# Supplementary material for: Astro-electrochemistry of NH3 clusters and ice: e− trapping, stability, and electron transfer
Source: Oxford University Press journal article supplement (doi:10.1093/mnras/stae735), 2024-05-06
Supplement: stae735_supplemental_file.pdf [file stae735_supplemental_file.pdf]

## **Electronic Supplementary Information**

### **Astro-electrochemistry of NH<sub>3</sub> clusters and ice: e<sup>-</sup> trapping, stability and electron transfer.**

Marco Fioroni<sup>1\*</sup>, Raghunath O. Ramabhadran<sup>2</sup> and Nathan J. DeYonker<sup>1\*</sup>

**1)** Department of Chemistry, 213 Smith Chemistry Building, The University of Memphis, Memphis, TN, USA, 38152

**2)** Center for Atomic, Molecular, and Optical Sciences and Technologies (CAMOST), Tirupati, Andhra Pradesh - 517507, India

**Corresponding Authors(\*):** Marco Fioroni: mfioroni@memphis.edu  
Nathan J. DeYonker: ndeyonker@memphis.edu

**Page 3-4 : Geometry Optimization+Freq+Set Parameters**

**Page 5-6 : DLPNO-CCSD(T)+Set Parameters**

**Page 7 : WF Stability**

**Page 8 : AIMD**

**Page 9-28 : Opt. Geom. XYZ (Å) of H<sub>2</sub>O and NH<sub>3</sub> Neat Clusters**

**Page 29 : ΔG NH<sub>3</sub> cluster conformers**

**Page 30-49: Opt. Geom. XYZ (Å) NH<sub>3</sub> Clusters + H<sub>2</sub>O, CH<sub>3</sub>OH, HCN, CO**

**Page 50-51: VDE Determination of the Solid Bulk Crystal Ammonia**

**Page 52-54: Level of theory and (NH<sub>3</sub>)<sub>n</sub> Electron Distribution**

**Page 55 : VAE dependency on the (NH<sub>3</sub>)<sub>23</sub> cluster geometry during a NVT AIMD simulation**

**Page 56 : AIMD Total Energy last 5 ps**

**Page 57 : AIMD : correlation r2-SCAN-3c with aug-cc-pVD(T)Z**

**Page 58-71: AIMD Snapshots (Å)**

**Page 71-72: Spin densities of (CO,H<sub>2</sub>O,HCN,CH<sub>3</sub>OH)-(NH<sub>3</sub>)<sub>n=8</sub> (no apparent electron transfer)**

**Page 73-74: Geometry Optimization+Freq, d-aug-cc-pVDZ**

**Page 75-76: DLPNO-CCSD(T), d-aug-cc-pV(D,T,Q)Z**

**Page 77: WF Stability, d-aug-cc-pV(D,T,Q)Z**

**Page 78: Opt. Geom. XYZ (Å) (NH<sub>3</sub>)<sub>4</sub>, d-aug-cc-pVDZ**

**Page 79: (NH<sub>3</sub>)<sub>4</sub> EA estimated by CBS**

## **Geometry Optimization+Freq**

```
! UKS RIJCOSX PBE0 def2-TZVPPD def2/J SmallPrint TightSCF Slowconv  
! D4  
! TightOpt  
! defgrid3  
! UNO  
! UCO  
! DIIS  
! MOREad
```

```
%moinp "Start.gbw"
```

```
%scf Maxiter=350  
end
```

```
%geom maxiter=300  
end
```

```
%geom  
Calc_Hess true  
NumHess true  
Recalc_Hess 5  
end
```

```
%geom  
inhess Read  
InHessName "Start.hess"  
end
```

```
%base "OPT"
```

```
* xyzfile -1 2 Start.xyz
```

```
$new_job  
%MaxCore 3000  
! UKS PBE0 RIJCOSX def2-TZVPPD def2/J SmallPrint TightSCF Slowconv  
! D4  
! NumFreq  
! defgrid3  
! UNO  
! UCO  
! DIIS  
! MORad
```

```
%moinp "OPT.gbw"
```

```
%scf Maxiter=150  
end
```

```
%base "FREQ"
```

```
%freq Temp 100, 200, 300  
CentralDiff true  
Increment 0.0030  
end
```

```
* xyzfile -1 2 OPT.xyz
```

### **TightSCF**

|                    |        |     |              |
|--------------------|--------|-----|--------------|
| Energy Change      | ToIE   | ... | 1.000e-08 Eh |
| 1 e- energy change |        | ... | 1.000e-05 Eh |
| DIIS Error         | ToIErr | ... | 5.000e-07    |

### **TightOPT**

Convergence Tolerances:

|                   |         |      |                    |
|-------------------|---------|------|--------------------|
| Energy Change     | ToIE    | .... | 1.0000e-06 Eh      |
| Max. Gradient     | ToIMAXG | .... | 1.0000e-04 Eh/bohr |
| RMS Gradient      | ToIRMSG | .... | 3.0000e-05 Eh/bohr |
| Max. Displacement | ToIMAXD | .... | 1.0000e-03 bohr    |
| RMS Displacement  | ToIRMSD | .... | 6.0000e-04 bohr    |

### **defgrid3**

|                              |                 |     |                      |
|------------------------------|-----------------|-----|----------------------|
| General Integration Accuracy | IntAcc          | ... | 4.871                |
| Radial Grid Type             | RadialGrid      | ... | OptM3 with GC (2021) |
| Angular Grid (max. ang.)     | AngularGrid     | ... | 4 (Lebedev-302)      |
| Angular grid pruning method  | GridPruning     | ... | 4 (adaptive)         |
| Weight generation scheme     | WeightScheme... |     | Becke                |
| Basis function cutoff        | BFCut           | ... | 1.0000e-11           |
| Integration weight cutoff    | WCut            | ... | 1.0000e-14           |

## **DLPNO-CCSD(T)**

```
! UHF RIJCOSX DLPNO-CCSD(T) aug-cc-pVQZ aug-cc-pVQZ/C NormalPNO TightSCF
SCFConvForced VerySlowConv
! UNO
! defgrid3
! DIIS
! MOrad

%moinp "OPT.gbw"

%base "DLPNO"

%scf sthresh 1e-7
end

%scf Maxiter 1500
    DIISMaxEq 15
    DirectResetFreq 1
end

%scf GuessMode CMatrix
end

%mdci Maxiter 500
end

%mdci MaxDIIS 14
LShift 0.1
end

%mdci
UseFullLMP2Guess false
end

%mdci LocRandom 0
end

%mdci KCOpt KC_MO
end

%mdci TrafoType trafo_full
end

%mdci Triples 2
end

* xyzfile -1 2 OPT.xyz
```

**NormalPNO**

TCutMKN: 1.000e-03  
TCutPAO: 1.000e-03  
TCutPNO: 3.330e-07  
TCutPNOSingles: 9.990e-09  
TCutPAOExt: 1.000e-01  
TCutPairs: 1.000e-04  
TCutPre: 1.000e-06  
TCutDOij: 1.000e-05  
PAO overlap thresh 1.000e-08

Number of singly-occupied orbitals: 1

TCutTNO: 1.000e-09  
TCutMP2Pairs: 1.000e-05  
TCutDOStrong: 2.000e-03  
TCutMKNStrong: 1.000e-02  
TCutMKNWeak: 1.000e-01  
TCutDOWeak: 4.000e-03  
NTCutTNO: 1

## **WF Stability**

```
%MaxCore 4000  
! UHF RIJCOSX aug-cc-pVQZ aug-cc-pVQZ/C SmallPrint TightSCF  
! defgrid3  
! DIIS  
! MOrad
```

```
%scf Maxiter 1500  
  DIISMaxEq 15  
  DirectResetFreq 1  
end
```

```
%scf  
HFTyp UHF  
STABPerform true  
end
```

```
%base "Stab"
```

```
%moinp "DLPNO.gbw"
```

```
* xyzfile -1 2 OPT.xyz
```

## **AIMD**

```
! r2scan-3c
! defgrid2
! UNO
! UCO
! DIIS
#! MOrad

#%moinp "Start.gbw"

%scf Maxiter=350
  end

%base "OPT"

%md
Timestep 0.5_fs
Initvel 210_K
Thermostat NHC 210_K Timecon 10.0_fs
Dump Position Stride 1 Filename "trajectory.xyz"

Restart IfExists

Run 5000
```



## Optimized Geometries XYZ Coordinates (Coord.=Å)

### Water Clusters

#### **(H<sub>2</sub>O)<sub>4</sub><sup>-</sup>**

12

Coordinates from ORCA-job OPT

|   |                   |                   |                  |
|---|-------------------|-------------------|------------------|
| O | -0.12652488318557 | -0.30451734839420 | 3.27262498255166 |
| O | 3.25666199988059  | -0.89919987238253 | 4.92784399353940 |
| O | 0.99158978555019  | 0.32410132887491  | 5.83798908092144 |
| H | 2.85323944624223  | -1.69574934587316 | 4.57668777886452 |
| H | -0.58906130292863 | 0.54902811524744  | 3.27141209120202 |
| H | 0.74248296683656  | -0.07007500562759 | 2.89179514728388 |
| H | 2.50604849930829  | -0.43361136871538 | 5.36676906309748 |
| O | 2.49201274227555  | 0.64925074851664  | 2.57522774417603 |
| H | 2.18141394171333  | 1.51914350984235  | 2.87888367157232 |
| H | 2.91194501345743  | 0.25780957398309  | 3.36073145207138 |
| H | 1.04558293883385  | 1.28686661915705  | 5.70781181301702 |
| H | 0.47115885201611  | 0.04269304537138  | 5.05926318170259 |

#### **(H<sub>2</sub>O)<sub>4</sub>**

12

Coordinates from ORCA-job OPT

|   |                   |                   |                  |
|---|-------------------|-------------------|------------------|
| O | -0.17899893938445 | 0.29499360355025  | 3.42677801525066 |
| O | 3.28081779273093  | -0.39925414688171 | 4.83501782008261 |
| O | 0.80404507766858  | -0.18779004902059 | 5.90699872745761 |
| H | 3.62641858856045  | -1.28359398398993 | 4.95724100002496 |
| H | -0.74397831080144 | 0.99090057298511  | 3.09378052961707 |
| H | 0.66155803002511  | 0.34717339006661  | 2.92376348513832 |
| H | 2.43372981780195  | -0.36737481502805 | 5.33140732649175 |
| O | 2.32869494395421  | 0.24863665051846  | 2.38533409880241 |
| H | 2.79119771490412  | 1.00965447295476  | 2.03520177489046 |
| H | 2.78598866092215  | 0.01441103403430  | 3.22299729855103 |
| H | 0.63243219792571  | 0.52493863541436  | 6.52207869077797 |
| H | 0.31464442569266  | 0.03304463539643  | 5.08644123291511 |

---

#### **I) (H<sub>2</sub>O)<sub>5</sub><sup>-</sup> (VDE=8.3 kcal/mol)**

15

Coordinates from ORCA-job OPT

|   |                   |                   |                  |
|---|-------------------|-------------------|------------------|
| O | 3.32839614813928  | 0.48057800995322  | 3.19497765724309 |
| O | 1.09364850080621  | 1.99485650478074  | 2.37260170140345 |
| O | -0.70871538353979 | 1.64219867211250  | 4.39803746815947 |
| O | 2.27927634783936  | -0.57272863194741 | 5.61997456637642 |
| O | -0.04521316204268 | -1.12864915216478 | 4.27139193049745 |
| H | 0.79038365360752  | 1.32247858438795  | 1.73956001730777 |
| H | -0.26736194195859 | 1.95945141140015  | 5.19131684199987 |
| H | 2.02084207162308  | 0.21300369847437  | 6.11072580472501 |
| H | -0.40732580636910 | -0.22135118136928 | 4.28821025431535 |
| H | 0.23815325397031  | -1.25115234387199 | 3.34852928019291 |
| H | 3.05603717215622  | 0.09806678824753  | 4.05213901867366 |
| H | 3.03563153638361  | -0.17959353991653 | 2.54594682822001 |
| H | 1.92256003317015  | 1.59656400744027  | 2.71216069414654 |
| H | -0.07641199987969 | 1.84349873973280  | 3.66751015545683 |
| H | 1.44720957609396  | -0.86042156725959 | 5.17499778128168 |

**I) (H2O)<sub>5</sub>**

15

Coordinates from ORCA-job OPT

|   |                   |                   |                  |
|---|-------------------|-------------------|------------------|
| O | 3.35088746867867  | 0.74580553128985  | 3.28742830244762 |
| O | 1.24630639337733  | 2.18560268557277  | 2.41602029767132 |
| O | -0.91175401059902 | 1.38400649485199  | 3.79683697480999 |
| O | 2.43823953780600  | -1.05730820357184 | 5.05496040602716 |
| O | -0.23076645337757 | -0.81259741929750 | 5.17895061940901 |
| H | 1.19241948557683  | 2.13579150076410  | 1.46204538515832 |
| H | -1.21186689831894 | 2.13924488350275  | 4.30246889837304 |
| H | 2.76335360288026  | -0.97035205333305 | 5.95100574433460 |
| H | -0.51685316928565 | -0.00699538464360 | 4.68985586768562 |
| H | -0.76424069952323 | -1.53102840600869 | 4.83983331492811 |
| H | 3.04642121770655  | 0.07702883194746  | 3.94338941428287 |
| H | 3.94616163616819  | 0.28336754026109  | 2.69826701875350 |
| H | 2.04177698087859  | 1.66776795861298  | 2.67502692964657 |
| H | -0.13985249710553 | 1.69988897521258  | 3.27328236213007 |
| H | 1.45687740513746  | -1.00342293516089 | 5.11870846434199 |

---

**II) (H2O)<sub>5</sub>**

15

Coordinates from ORCA-job OPT

|   |                   |                   |                  |
|---|-------------------|-------------------|------------------|
| O | 2.76942466871655  | 2.29971185345803  | 3.81767075063747 |
| O | 2.28794910293484  | 0.60188634054783  | 1.48912812835583 |
| O | 1.34722116157476  | -1.61736495188313 | 3.17394313799563 |
| O | 1.16071430153689  | -0.33190383839960 | 5.58862817299178 |
| H | 1.90808050565449  | 2.48295336309462  | 4.23104549998967 |
| H | 1.85613658402046  | -0.12345772230003 | 1.96162801584898 |
| H | 1.18868331660748  | -1.17189032459473 | 4.03310757729609 |
| H | 0.60887963194375  | -0.69165090891458 | 6.29018084222541 |
| H | 3.12398695588378  | 1.59338310609938  | 4.36161383254771 |
| H | 0.31265338263661  | 2.68863604752233  | 6.14149658063139 |
| O | 0.37374032389528  | 2.28329683744106  | 5.25775146568010 |
| H | 2.42050909658135  | 1.27328640633324  | 2.17381715557826 |
| H | -0.54012883657124 | 2.31639575677470  | 4.92777720159054 |
| H | 2.22879115128590  | -1.98086077033550 | 3.26135149737221 |
| H | 0.83411865329884  | 0.58914880515628  | 5.49489014125817 |

**II) (H2O)<sub>5</sub>**

15

Coordinates from ORCA-job OPT

|   |                   |                   |                  |
|---|-------------------|-------------------|------------------|
| O | 3.18465909657348  | 2.60848555524607  | 3.79640565493457 |
| O | 1.10634994471182  | 1.13882966261350  | 2.43091413400982 |
| O | 1.31677496104384  | -1.48552539066652 | 3.23643136718947 |
| O | 1.02447274228616  | -0.64098695752580 | 5.82990555741536 |
| H | 2.46650621836325  | 2.53685611777709  | 4.44087325139930 |
| H | 1.22889637623858  | 0.17682532422643  | 2.55092082689163 |
| H | 1.23162977213858  | -1.31837396922625 | 4.19643398689231 |
| H | 0.30709932425747  | -0.99040832812342 | 6.35862640026270 |
| H | 3.97761734047601  | 2.33405684433159  | 4.25704866762718 |
| H | -0.10830019827975 | 2.51000476090751  | 5.02049443362794 |
| O | 0.62772411606197  | 1.91157580317215  | 4.89253644605944 |
| H | 1.99170547407371  | 1.52228558902601  | 2.48381147328132 |
| H | 0.63386525331840  | 1.65349448396397  | 3.92966644269844 |
| H | 2.08979406316172  | -2.03900337827243 | 3.12814970803981 |
| H | 0.80196551557460  | 0.29345388255001  | 5.65181164967025 |

---

**I) (H<sub>2</sub>O)<sub>6</sub><sup>-</sup> (VDE=9.3 kcal/mol)**

18

Coordinates from ORCA-job OPT

|   |                  |                   |                  |
|---|------------------|-------------------|------------------|
| O | 3.23827474792069 | 1.61250311138276  | 3.56899230736888 |
| O | 0.68349702952601 | 0.41168003674783  | 3.41736926819815 |
| O | 3.78018505565776 | -0.70673587660556 | 5.13107663546416 |
| O | 1.19507972839110 | -0.87188784276347 | 5.88634868878994 |
| H | 2.70784212544820 | 2.24280667698358  | 4.07367539682562 |
| H | 0.06572073487895 | 0.47736787696752  | 2.67484010288927 |
| H | 0.47244957678356 | 1.99058975859840  | 4.39221562637137 |
| H | 0.82779364623543 | -0.55239475979065 | 5.04529829358060 |
| H | 3.50346176155215 | 0.92438150394280  | 4.20427632963050 |
| H | 0.24960048686476 | 3.46998920075415  | 4.77063462690158 |
| H | 1.09661169804032 | -0.11908762434935 | 6.49763582730048 |
| H | 1.54370961990423 | 0.74532480821298  | 3.09878964570768 |
| H | 2.85552590710394 | -0.83360460818444 | 5.45699973472372 |
| H | 3.85885028680461 | -1.31473194962787 | 4.39463968276584 |
| O | 1.17186114539355 | 1.52457606942626  | 7.39419509268467 |
| O | 0.79822562493320 | 2.70213956348344  | 4.98076116642378 |
| H | 2.10747905424873 | 1.68929114382675  | 7.52352289727031 |
| H | 0.94775177031246 | 2.04973291099468  | 6.59358867710239 |

**I) (H<sub>2</sub>O)<sub>6</sub><sup>-</sup>**

18

Coordinates from ORCA-job OPT

|   |                   |                   |                  |
|---|-------------------|-------------------|------------------|
| O | 3.33453316914665  | 0.88612752414751  | 2.91442375923612 |
| O | 0.75352828726963  | 0.98074301427634  | 3.47970958535118 |
| O | 3.93850194604348  | -0.64380618000837 | 5.00701949588644 |
| O | 1.39521748603367  | -0.67548420755331 | 5.77517285971965 |
| H | 3.82762802064983  | 1.70479164827622  | 2.96986080453118 |
| H | 0.22704089897802  | 0.74982591775123  | 2.71449515546480 |
| H | 0.36501590031232  | 2.31959811392542  | 4.60715087405721 |
| H | 0.99635160652970  | -0.26735010025285 | 4.99424354567626 |
| H | 3.67096761795259  | 0.31165065751582  | 3.64511247153038 |
| H | -0.60246627530098 | 3.34621311696868  | 5.24252652165892 |
| H | 1.19199115123753  | -0.05409755382706 | 6.50092263153214 |
| H | 1.70072593837875  | 0.98146528712901  | 3.18510467701317 |
| H | 3.02458353115247  | -0.71178882902622 | 5.38381699833647 |
| H | 4.24915543978795  | -1.54180779075505 | 4.89334584046678 |
| O | 0.75536399928075  | 1.35963251270909  | 7.53953918097707 |
| O | 0.25774598893868  | 2.94129118337344  | 5.35212617097535 |
| H | 1.46405468353593  | 1.74058945601357  | 8.05836221025634 |
| H | 0.55398061007283  | 2.01434622933641  | 6.84192721732995 |

**II) (H<sub>2</sub>O)<sub>6</sub><sup>-</sup> (VDE=8.3 kcal/mol)**

18

Coordinates from ORCA-job OPT

|   |                   |                   |                  |
|---|-------------------|-------------------|------------------|
| O | 3.40863786405635  | 1.42232501425841  | 3.82805429021672 |
| O | 1.04695573519539  | 1.48940308318008  | 2.34906742141434 |
| O | -0.56366179511168 | 2.15383145763799  | 4.52470406318353 |
| O | 3.07396174552973  | -1.21083472268352 | 4.67491655457511 |
| O | -0.89814288096366 | -0.47915609579097 | 5.37214357619371 |
| O | 1.46278825284573  | -0.54875994483903 | 6.85042561616064 |
| H | 0.83548647953702  | 0.55031047419197  | 2.26104435415067 |
| H | 1.67571168048895  | 0.39007742208919  | 6.93730862418870 |
| H | 3.13443244870616  | 1.92428638473588  | 4.60727654662244 |
| H | -0.02887290016709 | 1.99169342201435  | 3.71729143533257 |
| H | 3.38003841222859  | 0.48829689675506  | 4.13007730938670 |
| H | 0.58739807796884  | -0.54960478700860 | 6.40524761727035 |

|   |                   |                   |                  |
|---|-------------------|-------------------|------------------|
| H | 0.08592169860989  | 2.45702132472258  | 5.17316987717035 |
| H | 1.92215899125212  | 1.49065808684500  | 2.79438100307523 |
| H | -0.62212313691769 | -0.98002349244999 | 4.59282118762398 |
| H | -0.87012343585071 | 0.45520205008907  | 5.07117315392410 |
| H | 2.42537268557601  | -1.51450749093401 | 4.02568030265929 |
| H | 2.53842007701591  | -1.05076908281351 | 5.48235706685110 |

## II) (H<sub>2</sub>O)<sub>6</sub>

18

Coordinates from ORCA-job OPT

|   |                   |                   |                  |
|---|-------------------|-------------------|------------------|
| O | 3.48694287342026  | 1.05498205874063  | 3.25355118753482 |
| O | 1.14482703272173  | 2.12474418172077  | 2.52396152630167 |
| O | -0.98843949658128 | 1.83647807383961  | 4.11323531933447 |
| O | 3.50255125849924  | -0.88487308905163 | 5.09643800342033 |
| O | -0.97881508562346 | -0.11638507723174 | 5.94220544726536 |
| O | 1.36157875098444  | -1.18913141359583 | 6.67211163740895 |
| H | 1.03326633953407  | 1.87151034467168  | 1.60801120538166 |
| H | 1.47225898200641  | -0.93769296578325 | 7.58874446180512 |
| H | 4.16633749709789  | 1.66802549185840  | 3.53340394309402 |
| H | -0.19998462312765 | 1.92699803265525  | 3.53004013466481 |
| H | 3.47640251181131  | 0.33843779941007  | 3.92929892768259 |
| H | 0.50619163380780  | -0.79337973740268 | 6.38607362132282 |
| H | -1.17933260474565 | 2.71754333136631  | 4.43384370818627 |
| H | 2.00116130848353  | 1.73101246296577  | 2.80972000343642 |
| H | -1.65412918300962 | -0.72959083754406 | 5.65324855378623 |
| H | -0.96752242430007 | 0.60636102279176  | 5.27310451881312 |
| H | 3.70215547587541  | -1.76501159365586 | 4.77833454395678 |
| H | 2.70890975314561  | -0.98057808575520 | 5.67181325660440 |

## III) (H<sub>2</sub>O)<sub>6</sub><sup>-</sup> (VDE=7.5 kcal/mol)

18

Coordinates from ORCA-job OPT

|   |                   |                   |                   |
|---|-------------------|-------------------|-------------------|
| O | 1.41184228529580  | -0.27213145959234 | 1.42798548505304  |
| H | 0.56523503993019  | -0.72006374781828 | 1.63355041208227  |
| H | 2.09734916982052  | -0.66167860015516 | 1.98702181021947  |
| O | 0.75077026993368  | 1.95930266501937  | -0.11067336607511 |
| H | 1.08403656625813  | 1.45870214251340  | 0.65499699969056  |
| H | 1.11325778102453  | 1.43537282744982  | -0.84301489407808 |
| O | 1.58203634730829  | -0.49896944807445 | -1.32257363886498 |
| H | 2.37057673217646  | -0.83476926121478 | -1.76807864284107 |
| H | 1.75920662468927  | -0.61297096872715 | -0.36587256653683 |
| O | -1.82065950577960 | 1.26434507962125  | -0.04651019626025 |
| H | -0.88440988744743 | 1.59339195382351  | -0.07413963092465 |
| H | -2.37434585457180 | 2.03968681531430  | -0.13345957998459 |
| O | -1.10478599820335 | -1.27679533307910 | -1.39796895915581 |
| H | -0.15216747230857 | -1.10782518680462 | -1.52321963297292 |
| H | -1.47913327391958 | -0.39866211567788 | -1.25401702502662 |
| O | -1.21118964445289 | -1.19346252402693 | 1.42787632171733  |
| H | -1.14968573707053 | -1.50486288394338 | 0.50563026716252  |
| H | -1.59469521268312 | -0.31573480462762 | 1.30494044679572  |

## III) (H<sub>2</sub>O)<sub>6</sub> (Prismatic)

18

Coordinates from ORCA-job OPT

|   |                  |                   |                   |
|---|------------------|-------------------|-------------------|
| O | 1.46698224215191 | -0.37482780420978 | 1.38665975663261  |
| H | 0.53193600061862 | -0.70305423463334 | 1.50221896093689  |
| H | 1.97153281346353 | -0.68100407192302 | 2.13966566967876  |
| O | 0.76296621671074 | 1.97039708551623  | -0.06535748824424 |
| H | 1.09327804750425 | 1.42562863629834  | 0.66421982781905  |

|   |                   |                   |                   |
|---|-------------------|-------------------|-------------------|
| H | 1.12454872280053  | 1.52193962917076  | -0.83876580276800 |
| O | 1.65356752920947  | -0.50132419005112 | -1.33946426092700 |
| H | 2.38665216548571  | -0.93028115511320 | -1.78071566026719 |
| H | 1.78293901105915  | -0.63038293727176 | -0.38037789689548 |
| O | -1.84811403158840 | 1.24349117126292  | -0.06558691920628 |
| H | -0.94696300620570 | 1.63553763938012  | -0.07790573217498 |
| H | -2.46512914393791 | 1.96988554216507  | -0.15098989925795 |
| O | -1.12620176484609 | -1.26860439079565 | -1.34498892583251 |
| H | -0.19565555509512 | -1.08453831132076 | -1.53951760296070 |
| H | -1.53048506512491 | -0.39607349159159 | -1.24628319546720 |
| O | -1.05101696646554 | -1.11622626290954 | 1.40759674344092  |
| H | -1.11014746532766 | -1.44362927188955 | 0.48687375998478  |
| H | -1.53745152041259 | -0.28405843208414 | 1.34519227550851  |

---

### **Ammonia Clusters**

#### **Tetramer Neutral**

16

Coordinates from ORCA-job OPT

|   |                   |                   |                  |
|---|-------------------|-------------------|------------------|
| N | -0.44860736017956 | 0.58994029045208  | 3.31065939956275 |
| N | 3.41390358165641  | -0.88869508624130 | 4.86696275484252 |
| N | 0.58046574698600  | -0.42966709703999 | 6.06408366597763 |
| H | -1.13347724793384 | 0.03893020572840  | 2.80916155842495 |
| H | 4.10767824603059  | -0.35315714049141 | 5.37295257636076 |
| H | 0.04625423979966  | -1.23207656473068 | 6.37226662647613 |
| H | -0.73270937266833 | 1.55673902825288  | 3.21721048016707 |
| H | 0.44573971282125  | 0.48518331328969  | 2.82187072386809 |
| H | 2.52188162360359  | -0.77538539769451 | 5.35809425872547 |
| H | 3.68333526120680  | -1.86059820270308 | 4.95047191061915 |
| N | 2.39233600742818  | 0.15971350070535  | 2.12108404995263 |
| H | 2.92169236689497  | 0.97102488447268  | 1.82817509666977 |
| H | 2.82956943306168  | -0.19845593969937 | 2.97549455094945 |
| H | 2.51787155572667  | -0.54039764899870 | 1.40114449543103 |
| H | 0.46559384852696  | 0.28193906576650  | 6.77447254583381 |
| H | 0.14083235703896  | -0.08015721106854 | 5.20731530613869 |

#### **Tetramer+e<sup>-</sup>**

16

Coordinates from ORCA-job OPT

|   |                   |                   |                  |
|---|-------------------|-------------------|------------------|
| N | -0.47819606584141 | 0.58492466413842  | 3.30325987473134 |
| N | 3.45851033220667  | -0.90793756928774 | 4.86384521324361 |
| N | 0.57429430902461  | -0.43363504879575 | 6.13078630740876 |
| H | -1.14155414909633 | 0.02581432850777  | 2.77367630693189 |
| H | 4.14056581548183  | -0.36044196159990 | 5.38176813740004 |
| H | 0.01431947906807  | -1.22881108890940 | 6.42627883728932 |
| H | -0.75015713095209 | 1.55592343370308  | 3.17583143833744 |
| H | 0.43117495499379  | 0.47322509391372  | 2.84270073637235 |
| H | 2.55954385498413  | -0.78262020476672 | 5.34106812823981 |
| H | 3.71764642116425  | -1.88355666898408 | 4.98259423974817 |
| N | 2.42530259680939  | 0.17535139718259  | 2.05918334280723 |
| H | 2.95999404859175  | 1.00523319068005  | 1.81688308265585 |
| H | 2.82426360139289  | -0.18334077332948 | 2.93337644043047 |
| H | 2.62524685208565  | -0.51761920629476 | 1.34304588178841 |
| H | 0.42948841622520  | 0.29726818382205  | 6.82204711716920 |
| H | 0.16191666386152  | -0.09489776997985 | 5.25507491544588 |

### **Pentamer Neutral (Pentagonal)**

20

Coordinates from ORCA-job OPT

|   |                   |                   |                  |
|---|-------------------|-------------------|------------------|
| N | 3.67007369602507  | 1.00728414476839  | 3.39193241031469 |
| N | 1.13066998619011  | 1.98821890910820  | 1.90410530551409 |
| N | -0.78561592605230 | 2.06760520528720  | 4.34109915511458 |
| N | 2.57468971301175  | -1.44543331971092 | 4.96308094117101 |
| N | -0.47440145749705 | -0.88344451457634 | 5.26412142154216 |
| H | 3.98054421697723  | 1.70865573832148  | 4.05247203678276 |
| H | 0.82248704316055  | 1.28403678132422  | 1.24554854300626 |
| H | -1.68333526870587 | 2.42511094902724  | 4.04131540939006 |
| H | 2.96488599173617  | -1.58012409823280 | 5.88727981903321 |
| H | -0.63115000692298 | 0.08444256326687  | 4.96504619467999 |
| H | -1.05295961857224 | -1.47260025301612 | 4.67835630515850 |
| H | 3.33959120209043  | 0.20404614053499  | 3.93621412480315 |
| H | 4.49170934454545  | 0.70754402394798  | 2.88292428791958 |
| H | 1.36010011600440  | 2.80999762432081  | 1.36002503381963 |
| H | 2.00093345576856  | 1.64898108502362  | 2.32630030018313 |
| H | -0.43096960311398 | 2.71460963247034  | 5.03383928693615 |
| H | -0.15441811417902 | 2.11009270688583  | 3.53473088636896 |
| H | 1.56828733417344  | -1.28917585301213 | 5.07947438791670 |
| H | 2.68413388695156  | -2.32694198631679 | 4.47735886511069 |
| H | -0.84136599159133 | -0.96726547942207 | 6.20382528523446 |

### **Pentamer Neutral (Trigonal Bipyramidal distorted)**

20

Coordinates from ORCA-job OPT

|   |                   |                   |                  |
|---|-------------------|-------------------|------------------|
| N | 3.13747052306530  | 1.95491629872913  | 4.12959470737517 |
| N | 0.63791208984674  | 0.82387715276531  | 2.58088306304736 |
| N | 2.07794103977831  | -1.95711484973782 | 3.03093691181538 |
| N | 1.02634371808192  | -0.36113965777177 | 5.54428365798210 |
| H | 2.38349261331416  | 2.41999674422350  | 4.63143595922570 |
| H | 0.86134238959149  | -0.15916983963721 | 2.43397856275994 |
| H | 2.01203934154174  | -1.60983537982667 | 3.98593431229105 |
| H | 0.33913168301001  | -0.94870892018205 | 5.99811738120336 |
| H | 3.30950261504093  | 1.07920814912204  | 4.60818822037974 |
| H | 3.97112939828680  | 2.51868614815555  | 4.22843855547197 |
| H | 0.18377785688088  | 1.15990422241898  | 1.74177726422919 |
| H | 1.53447476917730  | 1.30022600727124  | 2.66267791795785 |
| H | 1.97016176016399  | -2.96232805834440 | 3.06071885524237 |
| H | 3.01711701645254  | -1.77052649261909 | 2.70387461019630 |
| H | 1.23040976911525  | 0.40140025103111  | 6.17743010778206 |
| H | 0.58693973651352  | 0.04988253520834  | 4.72410443175395 |
| N | 0.21532661833370  | 2.93124950220624  | 4.94860336105644 |
| H | -0.48965775547685 | 2.77123433825270  | 5.65629513327807 |
| H | 0.03901938467027  | 3.85159775616648  | 4.56654375645084 |
| H | 0.05924543261177  | 2.25558409256828  | 4.20156323050049 |

### **Pentamer+e<sup>-</sup>**

20

Coordinates from ORCA-job OPT

|   |                   |                   |                  |
|---|-------------------|-------------------|------------------|
| N | 3.74956805263399  | 1.58730251962560  | 3.37875573231814 |
| N | 0.68031602836917  | 0.90282078714299  | 2.12715891075018 |
| N | 0.63045908349877  | 2.62003246748312  | 5.04978875534186 |
| N | 2.42095362395534  | -0.76707077100311 | 5.31078353847368 |
| N | -0.90927970613656 | -1.17579399094018 | 3.85201105987417 |
| H | 2.83146601723253  | 1.58357093899525  | 2.93922214882675 |
| H | 0.12720437114803  | 0.23322295148164  | 2.67528557080600 |
| H | 1.44032863621060  | 2.26643110156659  | 5.54917409154015 |
| H | 1.90349683339988  | -0.66998596496646 | 6.18265020779875 |

|   |                   |                   |                  |
|---|-------------------|-------------------|------------------|
| H | -1.87278468577840 | -1.31804177319297 | 3.54930344885261 |
| H | -0.47377528186937 | -2.09978287814309 | 3.85867210154748 |
| H | 3.68648490213958  | 0.88113525311285  | 4.10945978593748 |
| H | 3.82066826779356  | 2.47815212303723  | 3.85689497988719 |
| H | 0.01950908764914  | 1.43510628288098  | 1.57126863871709 |
| H | 1.22309516791759  | 0.34800971044068  | 1.47329977446954 |
| H | -0.16408442794860 | 2.14205617702578  | 5.46573438394884 |
| H | 0.71370061845250  | 2.23042555937912  | 4.11269997844038 |
| H | 1.75272928435395  | -0.49699999276507 | 4.59263969369635 |
| H | 2.54139590667377  | -1.77010038086931 | 5.18738343876347 |
| H | -0.96066403010367 | -0.89153761377692 | 4.83283953026209 |

### **Hexamer Neutral (Hexagon)**

24

Coordinates from ORCA-job OPT

|   |                   |                   |                  |
|---|-------------------|-------------------|------------------|
| N | 3.76040571763479  | 1.16276656219368  | 3.48552860492754 |
| N | 1.09035576824120  | 1.68492334014856  | 1.98572453801074 |
| N | -0.93279595895370 | 2.25497192968996  | 4.27283534728319 |
| N | 3.30280535348820  | -1.58669360827181 | 4.85419404259277 |
| N | -1.35574630875850 | -0.58606200477164 | 5.44399767998553 |
| N | 1.24657725627951  | -0.95115880972377 | 7.08978099711418 |
| H | 3.91483533225871  | 1.85316577028177  | 4.20951152614666 |
| H | 0.85487028899299  | 0.84998804382035  | 1.46431273047326 |
| H | -1.70966038509958 | 2.79268475630255  | 3.91019848105989 |
| H | 4.10998495590207  | -2.05069862897636 | 5.25130971251889 |
| H | -1.28653270925705 | 0.36180470713866  | 5.05951961538682 |
| H | -1.36315467836773 | -1.22447267161523 | 4.65855523078518 |
| H | 1.09385782797947  | -1.61356117876208 | 7.83959912743632 |
| H | 1.46001720831833  | -0.06436245779316 | 7.52874075671220 |
| H | 3.64814336731015  | 0.25623212967492  | 3.95142607955185 |
| H | 4.61531664542109  | 1.11707351252451  | 2.94558149814291 |
| H | 1.23599622580960  | 2.41850542482553  | 1.30375586750970 |
| H | 1.99197068647823  | 1.51238201462291  | 2.44228046831082 |
| H | -0.46256818807075 | 2.84676535905194  | 4.94605159113295 |
| H | -0.27886089985129 | 2.10174181195876  | 3.49821653657185 |
| H | 2.63886714867118  | -1.42531052878071 | 5.61872399889574 |
| H | 2.87237449119123  | -2.25029251121116 | 4.22251125903563 |
| H | -2.26139969132390 | -0.66621680355193 | 5.88854614654595 |
| H | 0.35414054570541  | -0.83664615877627 | 6.59806816386845 |

### **Hexamer Neutral (Octahedron distorted)**

24

Coordinates from ORCA-job OPT

|   |                   |                   |                  |
|---|-------------------|-------------------|------------------|
| N | 3.32260530520537  | 1.76094221416106  | 3.81200917114339 |
| N | 0.67008678598867  | 0.67788774066278  | 2.73293894913672 |
| N | 3.65217508046021  | -0.87619481607352 | 5.50769334674299 |
| N | 0.57354870823945  | -0.72064073408490 | 5.73232882094888 |
| H | 2.84038753577702  | 2.44788283665573  | 4.37989407799763 |
| H | 0.68237428740102  | -0.32943733116605 | 2.63420661214813 |
| H | 4.03772477564682  | -1.17691044825060 | 6.39378887517713 |
| H | -0.18111446161957 | -1.30648934058288 | 6.06272173140782 |
| H | 3.58435138041658  | 0.99126247801328  | 4.42960503183523 |
| H | 4.17346092676092  | 2.18919982172625  | 3.47319183490219 |
| H | 0.35873926935115  | 1.05083313097922  | 1.84522423188757 |
| H | 1.63910159243298  | 0.97930306272265  | 2.87378727864625 |
| H | 2.64227638623936  | -1.03919289944536 | 5.54683557269710 |
| H | 4.03253817020446  | -1.49674523871800 | 4.80436781935035 |
| N | 1.98220457427866  | 1.60837487133456  | 7.24063268902527 |
| H | 2.21000783982382  | 2.14096081973170  | 8.06914242207911 |
| H | 2.85050771606375  | 1.25360936223753  | 6.85742463732479 |

|   |                   |                   |                  |
|---|-------------------|-------------------|------------------|
| H | 1.58912362758978  | 2.24929584893696  | 6.55293845341939 |
| H | 0.78156793065938  | -0.03418835033745 | 6.45659404489408 |
| H | 0.23627076681932  | -0.20743780046610 | 4.92497873235553 |
| N | 0.31109689277718  | 2.98852643429555  | 4.91389018171490 |
| H | -0.53929832209624 | 2.96566998479802  | 5.46254352476274 |
| H | 0.29094447089248  | 3.85190954855612  | 4.38643622994474 |
| H | 0.25298876068698  | 2.22302880431324  | 4.24218573045669 |

### **Hexamer Neutral (Boat)**

24

Coordinates from ORCA-job OPT

|   |                   |                   |                  |
|---|-------------------|-------------------|------------------|
| N | 3.79427563145844  | 1.08803586428016  | 3.40058546356535 |
| N | 2.22425339299591  | 2.74289293167888  | 5.48190517719049 |
| N | -0.72615781765874 | 2.18556503838058  | 4.41337705023060 |
| N | 3.55342155406286  | -1.49601205904029 | 5.07348675196412 |
| N | -1.46719142121152 | -0.78817294691769 | 5.11076459063670 |
| N | 1.22033596064081  | -0.26402054546474 | 6.65501956551373 |
| H | 4.76068695235822  | 1.31237641091429  | 3.20072737246401 |
| H | 2.71739360809955  | 2.65934955786434  | 6.36236295150939 |
| H | -1.33740061129241 | 2.87564439619374  | 4.83116731970124 |
| H | 4.31801088797218  | -1.75290040581450 | 5.68490713374094 |
| H | -1.32902829103060 | 0.17579174750775  | 4.79860334224154 |
| H | -1.46996848508878 | -1.37969103790483 | 4.29002667829595 |
| H | 1.14401312810834  | -0.28589038280933 | 7.66358856581256 |
| H | 1.28901683888046  | 0.71081355370022  | 6.38108650242517 |
| H | 3.78338272774729  | 0.18104388326852  | 3.87951251244969 |
| H | 3.33766177835716  | 0.96076280680427  | 2.50634757584997 |
| H | 2.78349135347395  | 2.24737562304920  | 4.77835472149133 |
| H | 2.24495608444628  | 3.72597022131429  | 5.24044019930364 |
| H | 0.20160680803404  | 2.32260223157966  | 4.81827079135889 |
| H | -0.65881895662438 | 2.41770477696621  | 3.43057052874503 |
| H | 2.78242795551333  | -1.17040438476322 | 5.66803975722326 |
| H | 3.24633946839870  | -2.35010391568853 | 4.62555779663002 |
| H | -2.39099573227493 | -0.84942385436241 | 5.51847182622839 |
| H | 0.33573718463357  | -0.60517951073663 | 6.27648582542709 |

### **Hexamer+e<sup>-</sup>**

24

Coordinates from ORCA-job OPT

|   |                   |                   |                  |
|---|-------------------|-------------------|------------------|
| N | 2.99264203158677  | 1.60406780054337  | 3.90492411551323 |
| N | 0.99858872849592  | -0.07978658857556 | 2.15108320871055 |
| N | 3.57896754565906  | -0.83208077541708 | 6.11974001056986 |
| N | 0.63858695235077  | -0.48758410186477 | 5.32830732642816 |
| H | 2.17562564784726  | 2.00728933033697  | 4.36123428695433 |
| H | 1.24046638446174  | -0.25665764071632 | 1.18264479261189 |
| H | 3.68262146851873  | -1.18610294732912 | 7.06318722820731 |
| H | -0.19115550599408 | -0.92346911306905 | 5.71328907955965 |
| H | 3.44859658912460  | 1.02918280227391  | 4.60918157063898 |
| H | 3.61116088963529  | 2.38236828615525  | 3.70792620433732 |
| H | 0.20579652912720  | 0.55681035584250  | 2.13702971165103 |
| H | 1.77098643503424  | 0.45327066911211  | 2.56127436964785 |
| H | 2.57139059650659  | -0.81431949532309 | 5.91376613931418 |
| H | 3.99524716484001  | -1.51652222755727 | 5.50002166007037 |
| N | 2.84774093899786  | 2.00828362246333  | 7.67859938911492 |
| H | 3.32486993466708  | 2.87882221111454  | 7.46786340290036 |
| H | 3.32134060397214  | 1.29361133407904  | 7.13110416057150 |
| H | 1.93402618230060  | 2.10633897705947  | 7.24335141436010 |
| H | 0.48820282037909  | 0.51895570944951  | 5.40005047524998 |
| H | 0.64515462912323  | -0.69364328932882 | 4.33032775516861 |
| N | 0.12686626738327  | 2.80590532010582  | 5.29797889150224 |



|   |                   |                  |                  |
|---|-------------------|------------------|------------------|
| H | -0.60428725998024 | 2.80813285623251 | 6.01226377551072 |
| H | 0.56218560036722  | 3.72984648246560 | 5.35144494046170 |
| H | -0.37171350085842 | 2.79472056792628 | 4.40391202801597 |

**Octamer Neutral**

32

Coordinates from ORCA-job OPT

|   |                   |                   |                  |
|---|-------------------|-------------------|------------------|
| N | -0.44196323024231 | 0.14316518630659  | 3.22119283055870 |
| N | 3.15408416727991  | -1.25569909107222 | 4.72846669100902 |
| N | 0.53619710348556  | 0.01335603364763  | 6.13101211430173 |
| H | -0.84760592516359 | -0.77061351983989 | 3.03606507169799 |
| H | 3.98090052615815  | -1.22407297199558 | 5.31024893175632 |
| H | -0.23569314772281 | 0.03515583054422  | 6.78530593517340 |
| H | -1.07630362033604 | 0.83476977859749  | 2.84392139954954 |
| H | 0.42114451553662  | 0.19887312054543  | 2.68576013069851 |
| H | 2.35424710555139  | -1.06439537008297 | 5.32742590941904 |
| H | 3.05692239943485  | -2.21149383798070 | 4.39629588219911 |
| N | 2.64176114877645  | 0.49177758450348  | 2.26220899731325 |
| H | 2.52690279833167  | 1.46746394854709  | 2.50655936978870 |
| H | 2.92860299651758  | -0.00695606735226 | 3.11250263988912 |
| H | 3.41623866073445  | 0.45045963746764  | 1.61178776641610 |
| H | 1.13040747671722  | 0.79911124730098  | 6.36411439986694 |
| H | 0.15070475829881  | 0.18587876451664  | 5.19549324049611 |
| N | -1.30538961341781 | -2.83667324731265 | 2.21929704420536 |
| N | 2.39704277492358  | -4.36669812857636 | 4.03210435365794 |
| N | -0.11560411619661 | -3.06430247595538 | 5.21980523768457 |
| H | -1.55359443940837 | -3.81103617689256 | 2.33715880415317 |
| H | 3.00619716163150  | -4.73301420318922 | 4.75264404954094 |
| H | -0.74863560492304 | -3.49477959191990 | 5.88092633342589 |
| H | -1.91338644549934 | -2.47355703535386 | 1.49608881361705 |
| H | -0.34505418940174 | -2.80618468977099 | 1.85715719930679 |
| H | 1.52905993442915  | -4.06352638813764 | 4.48857264373441 |
| H | 2.16634059334600  | -5.14709237613498 | 3.42993603168308 |
| N | 1.65144295394707  | -2.51405207266466 | 1.48579241477658 |
| H | 1.84355653203384  | -1.52170905661002 | 1.59578060201240 |
| H | 2.13095130643616  | -2.99729541855419 | 2.24177952267771 |
| H | 2.07993127065089  | -2.80860258318002 | 0.61826842985144 |
| H | 0.20298214016956  | -2.19204280198290 | 5.63340490645740 |
| H | -0.65847799207889 | -2.82079402741802 | 4.39460230308109 |

**Octamer+e<sup>-</sup>**

32

Coordinates from ORCA-job OPT

|   |                   |                   |                  |
|---|-------------------|-------------------|------------------|
| N | -0.53301877905903 | 0.10621558611356  | 3.18704262476033 |
| N | 3.21837056857382  | -1.34970135337377 | 4.72094223943469 |
| N | 0.62308172170755  | 0.15817519238853  | 6.06945450378102 |
| H | -0.89500661615047 | -0.82671678147155 | 2.99952255548288 |
| H | 4.04086498030130  | -1.36239810375148 | 5.31258223451735 |
| H | -0.09629885895182 | 0.31951807573483  | 6.76715782295188 |
| H | -1.17517655476048 | 0.76554733480284  | 2.76320780051995 |
| H | 0.34983263645747  | 0.19088373798081  | 2.68618127535989 |
| H | 2.43014751197941  | -1.10278197223390 | 5.31691487529569 |
| H | 3.06522340312800  | -2.30445036486538 | 4.40182039995437 |
| N | 2.62354081840736  | 0.61797832949723  | 2.39916823280454 |
| H | 2.43961421952478  | 1.53403322705941  | 2.80024903654882 |
| H | 2.92936725597222  | 0.01548281979826  | 3.17276881663142 |
| H | 3.42028479020850  | 0.72973684158709  | 1.78024890957679 |
| H | 1.27228483850829  | 0.93760721982646  | 6.13905347311543 |
| H | 0.16999324366056  | 0.23565802845554  | 5.15112478909353 |
| N | -1.25998406253190 | -3.01033681877355 | 2.21781586482154 |

|   |                   |                   |                  |
|---|-------------------|-------------------|------------------|
| N | 2.27893680885239  | -4.46262728217468 | 3.97451930793443 |
| N | -0.12045002323670 | -3.01579940824750 | 5.30598140165798 |
| H | -1.36457494624460 | -4.01036957441833 | 2.36869808872302 |
| H | 2.84234279490954  | -4.97246643964125 | 4.64745604260402 |
| H | -0.77793589456291 | -3.39683311487092 | 5.97622109049753 |
| H | -1.90486621040292 | -2.76181435083124 | 1.47429516545338 |
| H | -0.31207492597946 | -2.86628989275750 | 1.84985577626255 |
| H | 1.47256446938324  | -4.08468661420430 | 4.48603656528226 |
| H | 1.91217582151313  | -5.15245986822586 | 3.32385963789134 |
| N | 1.68964212329950  | -2.43937416181638 | 1.43425448753284 |
| H | 1.88185212794879  | -1.45243022470096 | 1.59483029160003 |
| H | 2.14019809441351  | -2.95783592743277 | 2.18611905674892 |
| H | 2.16066837549334  | -2.69859336849184 | 0.57539118046568 |
| H | 0.18651730524985  | -2.11480294085746 | 5.66727788068199 |
| H | -0.64420703761259 | -2.83264783010337 | 4.45162857201254 |

### **14mer Neutral**

56

Coordinates from ORCA-job OPT

|   |                   |                  |                   |
|---|-------------------|------------------|-------------------|
| N | 0.37581012794404  | 2.43096251351879 | 1.11261743101728  |
| H | -0.44664400428120 | 2.40050207715938 | 0.52457202274297  |
| H | 0.95171093943025  | 3.21170819633776 | 0.80007583221888  |
| H | 0.89346241464957  | 1.57974878598932 | 0.93547908322164  |
| N | 1.28859560582907  | 3.82971211248595 | 6.98923631770164  |
| N | 4.00238201886580  | 1.56402770784530 | 3.23421171213126  |
| H | 2.20066293148219  | 3.40530222074925 | 7.10451143447850  |
| H | 4.89329763246588  | 1.17303647262036 | 3.52528340034948  |
| H | 1.37884549337899  | 4.82085846248637 | 7.20858698502093  |
| H | 3.32666723348500  | 0.81068122684645 | 3.25156758757763  |
| H | 0.67281633460028  | 3.41271296496098 | 7.67429015817951  |
| H | 4.10669509962993  | 1.85127220178361 | 2.25871384403302  |
| N | 2.14665953944396  | 5.03974357048591 | 0.94727154953686  |
| N | 1.60403377819183  | 3.75801653937756 | 3.82367506909456  |
| H | 3.12263078140783  | 5.28725915541743 | 0.82000404628063  |
| H | 0.88099702873687  | 3.34791444037957 | 3.23849140859161  |
| H | 1.59191286425300  | 5.83603491144698 | 0.66230922410434  |
| H | 2.39267364449343  | 3.11769488967117 | 3.76689296990722  |
| H | 1.99954004660868  | 4.90386392505620 | 1.94600311434386  |
| H | 1.27989453427075  | 3.73658391154828 | 4.79012078630157  |
| N | 1.61094614694653  | 6.96675738534252 | 7.00792345748569  |
| N | 3.25340320671014  | 6.35955069990975 | 4.32124531996820  |
| H | 2.18546933700817  | 6.89871092153570 | 6.16837169683636  |
| H | 4.15268537642752  | 6.04762293307497 | 3.96646578773269  |
| H | 0.68081240969697  | 7.23739877923774 | 6.71494485840723  |
| H | 2.59346404551889  | 5.61443590674822 | 4.07881786624847  |
| H | 1.97524739541247  | 7.72730117899940 | 7.56660528124200  |
| H | 2.99416840065636  | 7.17817414401383 | 3.78570040110563  |
| N | 7.27733674505571  | 1.72096769075488 | 1.72523429555664  |
| N | 4.34163685039243  | 2.77278277023281 | 0.32272497705300  |
| H | 7.92052312113114  | 2.49972261451856 | 1.67668207848629  |
| H | 3.36634112901578  | 2.97340073240643 | 0.13071580379699  |
| H | 6.37245124900156  | 2.04688900119600 | 1.40600745467159  |
| H | 4.78629552899294  | 3.68617307314830 | 0.39017161102687  |
| H | 7.17970197108478  | 1.45302277302536 | 2.70186732678504  |
| H | 4.71899057658313  | 2.30334988775229 | -0.49042909503167 |
| N | 6.90442758972348  | 0.86864973563792 | 4.87842251921646  |
| N | 4.54594989319750  | 2.11573377574542 | 6.47696786119524  |
| H | 7.82166911348635  | 1.17827837604363 | 5.17466443040012  |
| H | 4.05034545881052  | 1.64060923564670 | 7.21909216715353  |
| H | 6.22760961171521  | 1.25085458924774 | 5.54482733273417  |

|   |                  |                   |                  |
|---|------------------|-------------------|------------------|
| H | 4.63193040559056 | 3.09994895851142  | 6.72650810234552 |
| H | 6.89981131853290 | -0.13817455236873 | 4.98464887067893 |
| H | 3.98236587904294 | 2.06180560035397  | 5.63487690026938 |
| N | 5.48112531360472 | 5.68525742383354  | 1.15874082214467 |
| N | 5.65790829200867 | 4.23787883098280  | 3.93722372461900 |
| H | 6.40684139742292 | 5.68588020660755  | 0.74880047844424 |
| H | 4.91972651320615 | 3.55337857367631  | 3.78764358876833 |
| H | 5.19337868460781 | 6.65444148167197  | 1.20736182861756 |
| H | 6.51623212092908 | 3.73699164774714  | 3.73797128409067 |
| H | 5.57533854108592 | 5.34662332634441  | 2.11904612109091 |
| H | 5.66038635716636 | 4.42201484641464  | 4.93475131420133 |
| N | 4.61044771467038 | 5.30611531769202  | 7.02008390577412 |
| H | 5.42528361249667 | 5.83542864810719  | 7.30341402674679 |
| H | 4.17793424845281 | 5.80385238387955  | 6.24260160274897 |
| H | 3.94929599972346 | 5.36066041615634  | 7.78551562055063 |

### **14mer+e<sup>-</sup>**

56

Coordinates from ORCA-job OPT

|   |                   |                  |                  |
|---|-------------------|------------------|------------------|
| N | -1.30019251500768 | 1.31768934879499 | 3.08586854626167 |
| H | -0.87818903425392 | 1.33190477093611 | 2.16524260325494 |
| H | -1.92858405763704 | 2.11108376700379 | 3.11892675935981 |
| H | -0.54699585512532 | 1.51660422444443 | 3.74985696351872 |
| N | 1.05108492035169  | 1.89951893968506 | 5.13806624725764 |
| N | 3.85392549672407  | 1.11855536199195 | 3.85503371970768 |
| H | 1.98891100157178  | 1.64805230858276 | 4.82009544372977 |
| H | 4.78466853943373  | 1.03740135850405 | 4.25314680043142 |
| H | 1.11681384786323  | 2.79416655431942 | 5.62646972676471 |
| H | 3.62060888006885  | 0.20528367292764 | 3.48504191944334 |
| H | 0.77884142597854  | 1.20713282484565 | 5.82444760354468 |
| H | 3.93870572256957  | 1.73879860952372 | 3.04915401864618 |
| N | 2.56709536882341  | 6.22272051871088 | 0.18621967170385 |
| N | 1.22351086319818  | 4.01328234622257 | 2.58630230383388 |
| H | 3.51370629167000  | 6.27901644458981 | 0.55887735030052 |
| H | 0.34142669059409  | 4.41553910038159 | 2.29585619970188 |
| H | 2.07018706743201  | 7.02605584796779 | 0.55186117568484 |
| H | 0.99618541267666  | 3.25869540990346 | 3.22803819643297 |
| H | 2.14693582160436  | 5.40824170237912 | 0.62153597360656 |
| H | 1.71143525114503  | 4.72458892033206 | 3.13083574662047 |
| N | 1.37974917355691  | 4.84022173646955 | 6.32802954702007 |
| N | 3.18247793455154  | 6.15771773430306 | 3.94340584759245 |
| H | 1.81283607800835  | 5.21566135969744 | 5.48540904593439 |
| H | 3.94610560702852  | 5.88595772620056 | 4.55812080579379 |
| H | 0.58648309848921  | 5.43792890689439 | 6.53089518757089 |
| H | 3.58376217242437  | 6.20513188910697 | 3.01016504985348 |
| H | 2.05109980785400  | 4.99877510027447 | 7.07381720627354 |
| H | 2.96507705905622  | 7.11463997816311 | 4.20673270164357 |
| N | 6.85397061344874  | 1.33324259813452 | 1.96363544657220 |
| N | 4.01775203458953  | 3.17385630765415 | 1.40025153843211 |
| H | 7.54819439834694  | 2.04434183892686 | 1.76926639509831 |
| H | 3.04873375511549  | 3.38482719982650 | 1.64800797161277 |
| H | 5.95040216728948  | 1.75970917100418 | 1.77673745736230 |
| H | 4.53725426471527  | 4.03519246954926 | 1.53471531248904 |
| H | 6.88594352816167  | 1.16218453935783 | 2.96589076158611 |
| H | 4.02808381442447  | 2.99020084230874 | 0.40453395418918 |
| N | 6.91818026822493  | 1.25798395960478 | 5.34662662405008 |
| N | 4.71052497147403  | 3.01635111628203 | 6.52913221985114 |
| H | 7.79496951846846  | 1.76568275216988 | 5.35163732359101 |
| H | 4.28671732373186  | 3.01088168510144 | 7.44966536910987 |
| H | 6.25179027427399  | 1.82329171682408 | 5.88649865756483 |

|   |                  |                  |                  |
|---|------------------|------------------|------------------|
| H | 4.94177807226709 | 3.98722040386706 | 6.33135282160621 |
| H | 7.07738686694251 | 0.40151951442696 | 5.86303857563522 |
| H | 3.98695771873258 | 2.73693918722227 | 5.87365481379719 |
| N | 5.56967991958619 | 6.45263078183993 | 1.55902929602270 |
| N | 6.72266424957809 | 4.55087321287404 | 3.69493921266582 |
| H | 6.15088136394565 | 6.52645569596089 | 0.73199465313044 |
| H | 6.43189156353964 | 3.58021159309969 | 3.64797965588954 |
| H | 5.57788440208335 | 7.36604650583782 | 2.00178580258833 |
| H | 7.72528902023434 | 4.54824888601064 | 3.84365602227978 |
| H | 6.04469377819927 | 5.81852444610025 | 2.21150862128904 |
| H | 6.31259564213824 | 4.95355052271336 | 4.53680596324958 |
| N | 5.63101246313996 | 6.24162529942331 | 6.28625231262290 |
| H | 5.82210169809597 | 7.10810266253389 | 5.77780514079376 |
| H | 4.85663260834966 | 6.46707541236733 | 6.91601069055803 |
| H | 6.44006087756937 | 6.09129684845556 | 6.89069522703874 |

### **23mer Neutral (amorphous)**

92

Coordinates from ORCA-job OPT

|   |                   |                   |                   |
|---|-------------------|-------------------|-------------------|
| N | 9.83010468028778  | 2.43660345167386  | 4.27140298564498  |
| H | 9.49575231025002  | 3.09986645535479  | 4.96878870530150  |
| H | 10.54478669576041 | 1.87894853377598  | 4.72188610257427  |
| H | 10.29338614131698 | 2.98252871600148  | 3.54112318494433  |
| N | 4.65729843461374  | 7.84305152736368  | 3.01767076922144  |
| N | 8.28394784689664  | 5.39945116024056  | 0.23171636860375  |
| H | 4.50189469917164  | 8.60998329477221  | 2.37709542837834  |
| H | 8.80877458546948  | 4.56705202786256  | -0.02688135525998 |
| H | 5.65537325192165  | 7.65905574426209  | 3.04083144405124  |
| H | 7.96393226916763  | 5.82967009246014  | -0.62602793597828 |
| H | 4.23700009522475  | 7.01228898945931  | 2.61136256856514  |
| H | 8.93944165990303  | 6.04208766303080  | 0.67065272374130  |
| N | 5.67930204621845  | -0.86557875562330 | 3.22544549285467  |
| N | 9.84198915726336  | 7.24396220978183  | 2.42356175303185  |
| H | 5.73507173232375  | -1.37060756235423 | 2.34889819720031  |
| H | 10.26752269004121 | 6.97344083417053  | 3.31302419324163  |
| H | 6.31362046249044  | -1.33522882453553 | 3.86053029265997  |
| H | 10.17883361288755 | 8.16811056072603  | 2.18801608528510  |
| H | 4.73102956326166  | -1.01762684418978 | 3.59077279637488  |
| H | 8.84692330353370  | 7.31682920636142  | 2.61039916061645  |
| N | 3.93240030656568  | 4.88980983875588  | 1.69678184870242  |
| N | 4.23124785959485  | 4.65272932650379  | 4.93657683919784  |
| H | 4.70383525537375  | 5.08442725828541  | 1.06923751044110  |
| H | 4.05190569074042  | 4.90788706036163  | 3.96769470328856  |
| H | 3.89152457381074  | 3.87273804676129  | 1.80152963082547  |
| H | 4.54051944344486  | 5.48938156697879  | 5.42196139981523  |
| H | 3.09065086236330  | 5.16303389851896  | 1.20464936484643  |
| H | 5.00105070650123  | 3.99188193552495  | 4.92637061956076  |
| N | 10.89042260256585 | 5.76739319500317  | 4.95312303833732  |
| N | 6.52815763449225  | 2.21911968459626  | 4.22896477708059  |
| H | 11.27774401592443 | 5.03634389089567  | 4.36703431427139  |
| H | 6.20364252534464  | 1.27951874550761  | 4.00968530295188  |
| H | 11.58987638723965 | 6.00785968306390  | 5.64276759981114  |
| H | 6.29707559926540  | 2.77347718097991  | 3.41152145197112  |
| H | 10.10508060703846 | 5.35051521405146  | 5.44826843603594  |
| H | 7.54535386467677  | 2.17163529035607  | 4.24063598468796  |
| N | 6.48108655484080  | 2.63928197345659  | 0.42936261727776  |
| N | 2.23302224136736  | 2.14487349222904  | 4.87420238657374  |
| H | 7.09650701262751  | 1.99415555252864  | 0.91204423075039  |
| H | 2.49772264354562  | 1.46662887692021  | 5.58043931346693  |

|   |                   |                   |                   |
|---|-------------------|-------------------|-------------------|
| H | 6.83522317369154  | 3.57333328769204  | 0.60688412041034  |
| H | 2.78110942652154  | 2.98741983348917  | 5.04064442897272  |
| H | 5.56599866582232  | 2.55820314979437  | 0.85676238898974  |
| H | 1.26356288359054  | 2.38199534236238  | 5.03881934049583  |
| N | 7.14199668259093  | 7.14648563341140  | 6.08991256429317  |
| N | 7.17113850663220  | 5.76080245170093  | 3.17212645604031  |
| H | 7.29018421344315  | 7.17868445237057  | 5.08634901988375  |
| H | 7.84036235512221  | 5.26872714338607  | 3.75218203841792  |
| H | 6.14613999630113  | 7.30787762884264  | 6.24615165728595  |
| H | 6.25658424059470  | 5.39769569446438  | 3.41006985637948  |
| H | 7.64826275423090  | 7.92279730707685  | 6.49462710747237  |
| H | 7.36725603849065  | 5.50593773896313  | 2.20510625581972  |
| N | 8.62898167546600  | 0.50199916789500  | 2.07217780117559  |
| H | 7.70323697511805  | 0.19421219123931  | 2.35138543162503  |
| H | 9.20646221683728  | -0.32632546390256 | 2.00501296507633  |
| H | 8.99240890379702  | 1.06918334130320  | 2.83962308716869  |
| N | 11.06388270695688 | 4.19512387071160  | 1.94016948483705  |
| H | 12.04148434356142 | 4.23164245121911  | 1.68059337620748  |
| H | 10.58139707688636 | 3.70880856755156  | 1.18660479126801  |
| H | 10.72629788338913 | 5.15549044179724  | 1.93947386436337  |
| N | 3.18957827371126  | -0.17843948724002 | 7.29944877009549  |
| H | 3.67454963120240  | -1.00897304490790 | 7.61604198021340  |
| H | 3.86340319205529  | 0.59447319438391  | 7.33154854791829  |
| H | 2.47543759204153  | 0.01416247762991  | 7.99047237029259  |
| N | 9.48951892715723  | 2.40904600796341  | -0.35233762673798 |
| N | 8.23861087509582  | 4.32616809702697  | 6.33438220934285  |
| H | 9.31085708799943  | 1.72299677207988  | 0.38272990512787  |
| H | 8.47190583837812  | 4.04474243646308  | 7.27834716440089  |
| H | 8.63668276212455  | 2.42839056248866  | -0.90167926979135 |
| H | 7.84212698532254  | 5.27273782952863  | 6.38939904643607  |
| H | 10.21794787485370 | 2.03828657415831  | -0.94878058254400 |
| H | 7.49360971132912  | 3.71142697131212  | 6.02334428725377  |
| N | 4.03857500695530  | 7.73177841925139  | 6.11491050216998  |
| N | 3.72209639330868  | 1.77098944523531  | 2.14191953213787  |
| H | 4.08372263698771  | 7.93024754279455  | 5.11441773568779  |
| H | 3.15547062304057  | 1.38671902161617  | 1.39635826502242  |
| H | 3.14555331739111  | 7.28183592879748  | 6.30524721017310  |
| H | 4.42182119704327  | 1.07006160367627  | 2.36447685000016  |
| H | 4.03140961178973  | 8.62071809324342  | 6.59807762731694  |
| H | 3.12631724601778  | 1.85396327713959  | 2.96871691721381  |
| N | 5.10672417172606  | 2.22729286133476  | 7.13351440864976  |
| N | 1.55750953276156  | 5.69389037761382  | 6.32926854314326  |
| H | 5.80956816977728  | 2.33547847696882  | 7.85331916606386  |
| H | 2.28609082599871  | 5.11881034954937  | 5.91167030742620  |
| H | 5.59407667104021  | 2.18787498197144  | 6.23771247491353  |
| H | 1.20049115990148  | 5.20279458366888  | 7.13796514238792  |
| H | 4.56916742744979  | 3.08596105445166  | 7.12208503916417  |
| H | 0.80006903699889  | 5.76365870671212  | 5.66270476095472  |
| N | 2.80725596490221  | -1.09314666570815 | 4.28683347278911  |
| H | 2.36008292691088  | -0.29724169995922 | 3.84721707095717  |
| H | 2.20582982790325  | -1.89419718565395 | 4.14658068468251  |
| H | 2.82511137833898  | -0.88639803434114 | 5.28641065649932  |

### **23mer+e<sup>-</sup> (amorphous)**

92

Coordinates from ORCA-job OPT

|   |                   |                  |                  |
|---|-------------------|------------------|------------------|
| N | 9.52053657312351  | 2.30018373991091 | 4.43870355337768 |
| H | 9.26808650761360  | 3.00188905602793 | 5.12830571322874 |
| H | 9.89602332166038  | 1.50890642238445 | 4.94898617077740 |
| H | 10.25440770445358 | 2.70145421288250 | 3.85727801255848 |

|   |                   |                   |                   |
|---|-------------------|-------------------|-------------------|
| N | 4.68584515596661  | 7.97303247468450  | 2.55021749245873  |
| N | 8.60768512823396  | 5.34242937487793  | 0.29577023916036  |
| H | 4.61473017579284  | 8.60807331852652  | 1.76571285080699  |
| H | 9.07734180399993  | 4.45293101858320  | 0.13843982091704  |
| H | 5.67433738998617  | 7.79272169229848  | 2.69974482814559  |
| H | 8.42067002772238  | 5.74986871814685  | -0.61091271680333 |
| H | 4.29240097668942  | 7.08192403563514  | 2.25320967536197  |
| H | 9.26158881067814  | 5.95270432921601  | 0.78032812897080  |
| N | 5.32801778674549  | -0.64477720916693 | 3.17347989369103  |
| N | 10.04675397259928 | 7.17721559914039  | 2.60818164050369  |
| H | 5.54231631118989  | -1.35106587736824 | 2.47681798669754  |
| H | 10.36152254131358 | 6.86050398311475  | 3.52939713251491  |
| H | 5.92767062564986  | -0.85355189874595 | 3.97033471838586  |
| H | 10.46096411092852 | 8.08496329568634  | 2.44049680715286  |
| H | 4.36662856737766  | -0.82373237709560 | 3.48019736181769  |
| H | 9.04418336899700  | 7.31399094954678  | 2.70063783622005  |
| N | 3.81584720937847  | 5.00854972926839  | 1.54470086202079  |
| N | 4.33361530171288  | 4.94174999052451  | 4.87274313403191  |
| H | 4.51165666309253  | 5.07458521996067  | 0.81070456968803  |
| H | 4.08807342292563  | 5.25594170400549  | 3.93883094361444  |
| H | 3.75838290134303  | 4.01734219121708  | 1.80536429427828  |
| H | 4.88737955876574  | 5.66918447038795  | 5.31274813774787  |
| H | 2.92793029536703  | 5.24078235557696  | 1.11562287957277  |
| H | 4.94167772769612  | 4.13319794431523  | 4.75598279925397  |
| N | 10.68945148661214 | 5.61142013986994  | 5.20402761199753  |
| N | 6.33955167359222  | 2.51898931555054  | 4.00259721714561  |
| H | 11.05462477341117 | 4.84877835707211  | 4.64207368690648  |
| H | 5.93579648830897  | 1.59739744415095  | 3.85476669877699  |
| H | 11.30719599980960 | 5.71536285873598  | 5.99873427957366  |
| H | 6.20810278064671  | 3.01205417581086  | 3.12544179999727  |
| H | 9.78855244807086  | 5.29426899905437  | 5.56769110369363  |
| H | 7.34495019950833  | 2.36919238535155  | 4.08716174362098  |
| N | 6.42791268835587  | 2.75932600822905  | 0.24657042266311  |
| N | 2.67562509630989  | 2.22568881026740  | 5.47376868675474  |
| H | 6.95099925785375  | 2.04296454978320  | 0.73913541589886  |
| H | 3.39521547607182  | 1.72818165888264  | 5.99487520747575  |
| H | 6.84176828351745  | 3.64820355643655  | 0.51000242770595  |
| H | 2.98280959523627  | 3.19536282107990  | 5.43256363635997  |
| H | 5.48592512346986  | 2.73088187169271  | 0.61929661691102  |
| H | 1.84083632535403  | 2.20610289805279  | 6.04671105100913  |
| N | 6.57796875616347  | 7.42969772071783  | 5.90739144196112  |
| N | 7.19109102610767  | 5.92985295927716  | 3.06434049047817  |
| H | 6.89134734471784  | 7.39279403157900  | 4.94238135482644  |
| H | 7.78404822416899  | 5.44306690605556  | 3.72795443749238  |
| H | 5.67769028081168  | 7.91478525514363  | 5.92082726264228  |
| H | 6.25586208518969  | 5.57162117658687  | 3.21824774761818  |
| H | 7.24295342053803  | 7.99996012148651  | 6.41347200359527  |
| H | 7.47954240084865  | 5.62963651395779  | 2.13394463345395  |
| N | 8.35824006629722  | 0.46807682241057  | 2.07930659966239  |
| H | 7.37615816261868  | 0.27390084132693  | 2.25657679647282  |
| H | 8.83064809096025  | -0.42591082681209 | 2.15972476346721  |
| H | 8.67165146936424  | 1.02693693435517  | 2.87434448485968  |
| N | 11.21825287232245 | 4.02132010548809  | 2.25746460859797  |
| H | 12.18921831070147 | 4.02305743441485  | 1.97126519003996  |
| H | 10.70383579893291 | 3.52046119444694  | 1.53599147917012  |
| H | 10.90368735022442 | 4.98837781189215  | 2.22440964212144  |
| N | 4.04442462602709  | -1.51344813478131 | 7.00737412015944  |
| H | 4.84662672747223  | -2.05168305397871 | 6.69000383755185  |
| H | 4.37190644535449  | -0.54678953720187 | 7.04649242687077  |
| H | 3.87125745569214  | -1.79818035871977 | 7.96512460075971  |

|   |                   |                   |                   |
|---|-------------------|-------------------|-------------------|
| N | 9.57983813498446  | 2.28227769033642  | -0.14998074086955 |
| N | 7.80824472387077  | 4.55082448373548  | 6.22509436514200  |
| H | 9.23648480825850  | 1.62853651267123  | 0.56167247671423  |
| H | 7.89876561372920  | 4.16510299532914  | 7.15827315057271  |
| H | 8.82253476924278  | 2.36230000483783  | -0.82070761628539 |
| H | 7.31102297361216  | 5.44005933064613  | 6.30784357745752  |
| H | 10.34665272737302 | 1.82703978533383  | -0.62933655077477 |
| H | 7.19164581508387  | 3.91695144906968  | 5.72324893602662  |
| N | 3.69307602728438  | 8.55713076191742  | 5.53999680454167  |
| N | 3.49036204162676  | 2.00444507235842  | 2.31431686295149  |
| H | 3.84141678734601  | 8.43588431195420  | 4.53790864105529  |
| H | 2.74028483179463  | 1.62552203039070  | 1.74802049610521  |
| H | 2.99142222204884  | 7.88394526942991  | 5.84227459936479  |
| H | 4.18579058264002  | 1.26284600548562  | 2.37679501312915  |
| H | 3.30491878498410  | 9.48058907645562  | 5.67863728457349  |
| H | 3.11415191972832  | 2.08922884061009  | 3.25953598212282  |
| N | 5.51409354109057  | 1.35948441097234  | 6.96195399873716  |
| N | 1.91529597195806  | 6.01480628152486  | 6.51258726904487  |
| H | 6.32624132479187  | 0.74990175850870  | 7.05809848168152  |
| H | 2.63434190987248  | 5.51041340415197  | 5.98855988737205  |
| H | 5.70900234947000  | 1.93678392627024  | 6.14556296449226  |
| H | 2.04082864611094  | 5.76733845168529  | 7.48619179362961  |
| H | 5.53050112576525  | 1.98091196038903  | 7.76620876053971  |
| H | 1.01868440170978  | 5.64090593763286  | 6.22892101482946  |
| N | 2.44959569647119  | -0.87716348814562 | 4.38223198316147  |
| H | 2.30363850085083  | 0.12184198300463  | 4.49668578760289  |
| H | 1.55042737722944  | -1.29954686418556 | 4.19131883449053  |
| H | 2.77668806130425  | -1.22828566109126 | 5.28412518463397  |

#### **14mer unit cell constrained**

56

NH\_3 & P 2\_1 3-T<sup>4</sup> #198 & cP16 & ND\_3 data from Wyckoff Vol II. pp. 117-9

|   |            |            |            |
|---|------------|------------|------------|
| N | 1.10474700 | 1.10474700 | 1.10474700 |
| H | 1.90403400 | 1.33995120 | 0.55695540 |
| H | 0.55695540 | 1.90403400 | 1.33995120 |
| H | 1.33995120 | 0.55695540 | 1.90403400 |
| N | 1.10474700 | 1.10474700 | 6.19574700 |
| N | 3.65024700 | 1.44075300 | 3.98625300 |
| H | 1.90403400 | 1.33995120 | 5.64795540 |
| H | 4.44953400 | 1.20554880 | 4.53404460 |
| H | 0.55695540 | 1.90403400 | 6.43095120 |
| H | 3.10245540 | 0.64146600 | 3.75104880 |
| H | 1.33995120 | 0.55695540 | 6.99503400 |
| H | 3.88545120 | 1.98854460 | 3.18696600 |
| N | 1.10474700 | 6.19574700 | 1.10474700 |
| N | 1.44075300 | 3.98625300 | 3.65024700 |
| H | 1.90403400 | 6.43095120 | 0.55695540 |
| H | 0.64146600 | 3.75104880 | 3.10245540 |
| H | 0.55695540 | 6.99503400 | 1.33995120 |
| H | 1.98854460 | 3.18696600 | 3.88545120 |
| H | 1.33995120 | 5.64795540 | 1.90403400 |
| H | 1.20554880 | 4.53404460 | 4.44953400 |
| N | 1.10474700 | 6.19574700 | 6.19574700 |
| N | 3.65024700 | 6.53175300 | 3.98625300 |
| H | 1.90403400 | 6.43095120 | 5.64795540 |
| H | 4.44953400 | 6.29654880 | 4.53404460 |
| H | 0.55695540 | 6.99503400 | 6.43095120 |
| H | 3.10245540 | 5.73246600 | 3.75104880 |
| H | 1.33995120 | 5.64795540 | 6.99503400 |
| H | 3.88545120 | 7.07954460 | 3.18696600 |

|   |            |            |            |
|---|------------|------------|------------|
| N | 6.19574700 | 1.10474700 | 1.10474700 |
| N | 3.98625300 | 3.65024700 | 1.44075300 |
| H | 6.99503400 | 1.33995120 | 0.55695540 |
| H | 3.18696600 | 3.88545120 | 1.98854460 |
| H | 5.64795540 | 1.90403400 | 1.33995120 |
| H | 4.53404460 | 4.44953400 | 1.20554880 |
| H | 6.43095120 | 0.55695540 | 1.90403400 |
| H | 3.75104880 | 3.10245540 | 0.64146600 |
| N | 6.19574700 | 1.10474700 | 6.19574700 |
| N | 3.98625300 | 3.65024700 | 6.53175300 |
| H | 6.99503400 | 1.33995120 | 5.64795540 |
| H | 3.18696600 | 3.88545120 | 7.07954460 |
| H | 5.64795540 | 1.90403400 | 6.43095120 |
| H | 4.53404460 | 4.44953400 | 6.29654880 |
| H | 6.43095120 | 0.55695540 | 6.99503400 |
| H | 3.75104880 | 3.10245540 | 5.73246600 |
| N | 6.19574700 | 6.19574700 | 1.10474700 |
| N | 6.53175300 | 3.98625300 | 3.65024700 |
| H | 6.99503400 | 6.43095120 | 0.55695540 |
| H | 5.73246600 | 3.75104880 | 3.10245540 |
| H | 5.64795540 | 6.99503400 | 1.33995120 |
| H | 7.07954460 | 3.18696600 | 3.88545120 |
| H | 6.43095120 | 5.64795540 | 1.90403400 |
| H | 6.29654880 | 4.53404460 | 4.44953400 |
| N | 6.19574700 | 6.19574700 | 6.19574700 |
| H | 6.99503400 | 6.43095120 | 5.64795540 |
| H | 5.64795540 | 6.99503400 | 6.43095120 |
| H | 6.43095120 | 5.64795540 | 6.99503400 |

### 23mer 2 unit cell constrained

92

NH\_3 & P 2\_1 3-T<sup>4</sup> #198 & cP16 & ND\_3 data from Wyckoff Vol II. pp. 117-9

|   |         |         |         |
|---|---------|---------|---------|
| N | 1.10475 | 1.10475 | 1.10475 |
| H | 1.90403 | 1.33995 | 0.55696 |
| H | 0.55696 | 1.90403 | 1.33995 |
| H | 1.33995 | 0.55696 | 1.90403 |
| N | 1.10475 | 1.10475 | 6.19575 |
| N | 3.65025 | 1.44075 | 3.98625 |
| H | 1.90403 | 1.33995 | 5.64796 |
| H | 4.44953 | 1.20555 | 4.53404 |
| H | 0.55696 | 1.90403 | 6.43095 |
| H | 3.10246 | 0.64147 | 3.75105 |
| H | 1.33995 | 0.55696 | 6.99503 |
| H | 3.88545 | 1.98854 | 3.18697 |
| N | 1.10475 | 6.19575 | 1.10475 |
| N | 1.44075 | 3.98625 | 3.65025 |
| H | 1.90403 | 6.43095 | 0.55696 |
| H | 0.64147 | 3.75105 | 3.10246 |
| H | 0.55696 | 6.99503 | 1.33995 |
| H | 1.98854 | 3.18697 | 3.88545 |
| H | 1.33995 | 5.64796 | 1.90403 |
| H | 1.20555 | 4.53404 | 4.44953 |
| N | 1.10475 | 6.19575 | 6.19575 |
| N | 3.65025 | 6.53175 | 3.98625 |
| H | 1.90403 | 6.43095 | 5.64796 |
| H | 4.44953 | 6.29655 | 4.53404 |
| H | 0.55696 | 6.99503 | 6.43095 |
| H | 3.10246 | 5.73247 | 3.75105 |
| H | 1.33995 | 5.64796 | 6.99503 |
| H | 3.88545 | 7.07954 | 3.18697 |



|   |          |         |         |
|---|----------|---------|---------|
| N | 6.19575  | 1.10475 | 1.10475 |
| N | 3.98625  | 3.65025 | 1.44075 |
| H | 6.99503  | 1.33995 | 0.55696 |
| H | 3.18697  | 3.88545 | 1.98854 |
| H | 5.64796  | 1.90403 | 1.33995 |
| H | 4.53404  | 4.44953 | 1.20555 |
| H | 6.43095  | 0.55696 | 1.90403 |
| H | 3.75105  | 3.10246 | 0.64147 |
| N | 6.19575  | 1.10475 | 6.19575 |
| N | 3.98625  | 3.65025 | 6.53175 |
| H | 6.99503  | 1.33995 | 5.64796 |
| H | 3.18697  | 3.88545 | 7.07954 |
| H | 5.64796  | 1.90403 | 6.43095 |
| H | 4.53404  | 4.44953 | 6.29655 |
| H | 6.43095  | 0.55696 | 6.99503 |
| H | 3.75105  | 3.10246 | 5.73247 |
| N | 6.19575  | 6.19575 | 1.10475 |
| N | 6.53175  | 3.98625 | 3.65025 |
| H | 6.99503  | 6.43095 | 0.55696 |
| H | 5.73247  | 3.75105 | 3.10246 |
| H | 5.64796  | 6.99503 | 1.33995 |
| H | 7.07954  | 3.18697 | 3.88545 |
| H | 6.43095  | 5.64796 | 1.90403 |
| H | 6.29655  | 4.53404 | 4.44953 |
| N | 6.19575  | 6.19575 | 6.19575 |
| H | 6.99503  | 6.43095 | 5.64796 |
| H | 5.64796  | 6.99503 | 6.43095 |
| H | 6.43095  | 5.64796 | 6.99503 |
| N | 8.69440  | 1.26639 | 3.95734 |
| H | 9.49369  | 1.03119 | 4.50513 |
| H | 8.14661  | 0.46710 | 3.72213 |
| H | 8.92961  | 1.81418 | 3.15805 |
| N | 8.69440  | 6.35739 | 3.95734 |
| H | 9.49369  | 6.12219 | 4.50513 |
| H | 8.14661  | 5.55810 | 3.72213 |
| H | 8.92961  | 6.90518 | 3.15805 |
| N | 11.23990 | 0.93038 | 1.07583 |
| N | 9.03041  | 3.47588 | 1.41184 |
| H | 12.03919 | 1.16559 | 0.52804 |
| H | 8.23112  | 3.71109 | 1.95963 |
| H | 10.69211 | 1.72967 | 1.31104 |
| H | 9.57820  | 4.27517 | 1.17663 |
| H | 11.47511 | 0.38259 | 1.87512 |
| H | 8.79520  | 2.92809 | 0.61255 |
| N | 11.23990 | 0.93038 | 6.16683 |
| N | 9.03041  | 3.47588 | 6.50284 |
| H | 12.03919 | 1.16559 | 5.61904 |
| H | 8.23112  | 3.71109 | 7.05063 |
| H | 10.69211 | 1.72967 | 6.40204 |
| H | 9.57820  | 4.27517 | 6.26763 |
| H | 11.47511 | 0.38259 | 6.96612 |
| H | 8.79520  | 2.92809 | 5.70355 |
| N | 11.23990 | 6.02138 | 1.07583 |
| N | 11.57591 | 3.81189 | 3.62133 |
| H | 12.03919 | 6.25659 | 0.52804 |
| H | 10.77662 | 3.57669 | 3.07354 |
| H | 10.69211 | 6.82067 | 1.31104 |
| H | 12.12370 | 3.01260 | 3.85654 |
| H | 11.47511 | 5.47359 | 1.87512 |
| H | 11.34070 | 4.35968 | 4.42062 |

|   |          |         |         |
|---|----------|---------|---------|
| N | 11.23990 | 6.02138 | 6.16683 |
| H | 12.03919 | 6.25659 | 5.61904 |
| H | 10.69211 | 6.82067 | 6.40204 |
| H | 11.47511 | 5.47359 | 6.96612 |

**38mer 4 unit cell constrained**

152

NH\_3 & P 2\_1 3-T<sup>4</sup> #198 & cP16 & ND\_3 data from Wyckoff Vol II. pp. 117-9

|   |         |         |         |
|---|---------|---------|---------|
| N | 1.10475 | 1.10475 | 1.10475 |
| H | 1.90403 | 1.33995 | 0.55696 |
| H | 0.55696 | 1.90403 | 1.33995 |
| H | 1.33995 | 0.55696 | 1.90403 |
| N | 1.10475 | 1.10475 | 6.19575 |
| N | 3.65025 | 1.44075 | 3.98625 |
| H | 1.90403 | 1.33995 | 5.64796 |
| H | 4.44953 | 1.20555 | 4.53404 |
| H | 0.55696 | 1.90403 | 6.43095 |
| H | 3.10246 | 0.64147 | 3.75105 |
| H | 1.33995 | 0.55696 | 6.99503 |
| H | 3.88545 | 1.98854 | 3.18697 |
| N | 1.10475 | 6.19575 | 1.10475 |
| N | 1.44075 | 3.98625 | 3.65025 |
| H | 1.90403 | 6.43095 | 0.55696 |
| H | 0.64147 | 3.75105 | 3.10246 |
| H | 0.55696 | 6.99503 | 1.33995 |
| H | 1.98854 | 3.18697 | 3.88545 |
| H | 1.33995 | 5.64796 | 1.90403 |
| H | 1.20555 | 4.53404 | 4.44953 |
| N | 1.10475 | 6.19575 | 6.19575 |
| N | 3.65025 | 6.53175 | 3.98625 |
| H | 1.90403 | 6.43095 | 5.64796 |
| H | 4.44953 | 6.29655 | 4.53404 |
| H | 0.55696 | 6.99503 | 6.43095 |
| H | 3.10246 | 5.73247 | 3.75105 |
| H | 1.33995 | 5.64796 | 6.99503 |
| H | 3.88545 | 7.07954 | 3.18697 |
| N | 6.19575 | 1.10475 | 1.10475 |
| N | 3.98625 | 3.65025 | 1.44075 |
| H | 6.99503 | 1.33995 | 0.55696 |
| H | 3.18697 | 3.88545 | 1.98854 |
| H | 5.64796 | 1.90403 | 1.33995 |
| H | 4.53404 | 4.44953 | 1.20555 |
| H | 6.43095 | 0.55696 | 1.90403 |
| H | 3.75105 | 3.10246 | 0.64147 |
| N | 6.19575 | 1.10475 | 6.19575 |
| N | 3.98625 | 3.65025 | 6.53175 |
| H | 6.99503 | 1.33995 | 5.64796 |
| H | 3.18697 | 3.88545 | 7.07954 |
| H | 5.64796 | 1.90403 | 6.43095 |
| H | 4.53404 | 4.44953 | 6.29655 |
| H | 6.43095 | 0.55696 | 6.99503 |
| H | 3.75105 | 3.10246 | 5.73247 |
| N | 6.19575 | 6.19575 | 1.10475 |
| N | 6.53175 | 3.98625 | 3.65025 |
| H | 6.99503 | 6.43095 | 0.55696 |
| H | 5.73247 | 3.75105 | 3.10246 |
| H | 5.64796 | 6.99503 | 1.33995 |
| H | 7.07954 | 3.18697 | 3.88545 |
| H | 6.43095 | 5.64796 | 1.90403 |
| H | 6.29655 | 4.53404 | 4.44953 |

|   |          |          |         |
|---|----------|----------|---------|
| N | 6.19575  | 6.19575  | 6.19575 |
| H | 6.99503  | 6.43095  | 5.64796 |
| H | 5.64796  | 6.99503  | 6.43095 |
| H | 6.43095  | 5.64796  | 6.99503 |
| N | 8.69440  | 1.26639  | 3.95734 |
| H | 9.49369  | 1.03119  | 4.50513 |
| H | 8.14661  | 0.46710  | 3.72213 |
| H | 8.92961  | 1.81418  | 3.15805 |
| N | 8.69440  | 6.35739  | 3.95734 |
| H | 9.49369  | 6.12219  | 4.50513 |
| H | 8.14661  | 5.55810  | 3.72213 |
| H | 8.92961  | 6.90518  | 3.15805 |
| N | 11.23990 | 0.93038  | 1.07583 |
| N | 9.03041  | 3.47588  | 1.41184 |
| H | 12.03919 | 1.16559  | 0.52804 |
| H | 8.23112  | 3.71109  | 1.95963 |
| H | 10.69211 | 1.72967  | 1.31104 |
| H | 9.57820  | 4.27517  | 1.17663 |
| H | 11.47511 | 0.38259  | 1.87512 |
| H | 8.79520  | 2.92809  | 0.61255 |
| N | 11.23990 | 0.93038  | 6.16683 |
| N | 9.03041  | 3.47588  | 6.50284 |
| H | 12.03919 | 1.16559  | 5.61904 |
| H | 8.23112  | 3.71109  | 7.05063 |
| H | 10.69211 | 1.72967  | 6.40204 |
| H | 9.57820  | 4.27517  | 6.26763 |
| H | 11.47511 | 0.38259  | 6.96612 |
| H | 8.79520  | 2.92809  | 5.70355 |
| N | 11.23990 | 6.02138  | 1.07583 |
| N | 11.57591 | 3.81189  | 3.62133 |
| H | 12.03919 | 6.25659  | 0.52804 |
| H | 10.77662 | 3.57669  | 3.07354 |
| H | 10.69211 | 6.82067  | 1.31104 |
| H | 12.12370 | 3.01260  | 3.85654 |
| H | 11.47511 | 5.47359  | 1.87512 |
| H | 11.34070 | 4.35968  | 4.42062 |
| N | 11.23990 | 6.02138  | 6.16683 |
| H | 12.03919 | 6.25659  | 5.61904 |
| H | 10.69211 | 6.82067  | 6.40204 |
| H | 11.47511 | 5.47359  | 6.96612 |
| N | 0.96111  | -3.64356 | 1.07901 |
| H | 1.76040  | -3.40836 | 0.53121 |
| H | 0.41332  | -2.84428 | 1.31421 |
| H | 1.19632  | -4.19136 | 1.87829 |
| N | 0.96111  | -3.64356 | 6.17001 |
| N | 3.50661  | -3.30756 | 3.96051 |
| H | 1.76040  | -3.40836 | 5.62221 |
| H | 4.30590  | -3.54276 | 4.50830 |
| H | 0.41332  | -2.84428 | 6.40521 |
| H | 2.95882  | -4.10685 | 3.72531 |
| H | 1.19632  | -4.19136 | 6.96929 |
| H | 3.74182  | -2.75977 | 3.16123 |
| N | 1.29712  | -0.76206 | 3.62451 |
| H | 0.49783  | -0.99726 | 3.07671 |
| H | 1.84491  | -1.56135 | 3.85971 |
| H | 1.06191  | -0.21427 | 4.42379 |
| N | 6.05211  | -3.64356 | 1.07901 |
| N | 3.84262  | -1.09806 | 1.41501 |
| H | 6.85140  | -3.40836 | 0.53121 |
| H | 3.04333  | -0.86286 | 1.96280 |

|   |          |          |         |
|---|----------|----------|---------|
| H | 5.50432  | -2.84428 | 1.31421 |
| H | 4.39041  | -0.29878 | 1.17981 |
| H | 6.28732  | -4.19136 | 1.87829 |
| H | 3.60741  | -1.64586 | 0.61573 |
| N | 6.05211  | -3.64356 | 6.17001 |
| N | 3.84262  | -1.09806 | 6.50601 |
| H | 6.85140  | -3.40836 | 5.62221 |
| H | 3.04333  | -0.86286 | 7.05380 |
| H | 5.50432  | -2.84428 | 6.40521 |
| H | 4.39041  | -0.29878 | 6.27081 |
| H | 6.28732  | -4.19136 | 6.96929 |
| H | 3.60741  | -1.64586 | 5.70673 |
| N | 6.38812  | -0.76206 | 3.62451 |
| H | 5.58883  | -0.99726 | 3.07671 |
| H | 6.93591  | -1.56135 | 3.85971 |
| H | 6.15291  | -0.21427 | 4.42379 |
| N | 8.55077  | -3.48192 | 3.93160 |
| H | 9.35005  | -3.71713 | 4.47939 |
| H | 8.00297  | -4.28121 | 3.69639 |
| H | 8.78597  | -2.93413 | 3.13231 |
| N | 11.09627 | -3.81793 | 1.05009 |
| N | 8.88677  | -1.27243 | 1.38610 |
| H | 11.89555 | -3.58272 | 0.50230 |
| H | 8.08748  | -1.03722 | 1.93389 |
| H | 10.54847 | -3.01864 | 1.28530 |
| H | 9.43456  | -0.47314 | 1.15089 |
| H | 11.33147 | -4.36572 | 1.84938 |
| H | 8.65157  | -1.82022 | 0.58681 |
| N | 11.09627 | -3.81793 | 6.14109 |
| N | 8.88677  | -1.27243 | 6.47710 |
| H | 11.89555 | -3.58272 | 5.59330 |
| H | 8.08748  | -1.03722 | 7.02489 |
| H | 10.54847 | -3.01864 | 6.37630 |
| H | 9.43456  | -0.47314 | 6.24189 |
| H | 11.33147 | -4.36572 | 6.94038 |
| H | 8.65157  | -1.82022 | 5.67781 |
| N | 11.43227 | -0.93642 | 3.59559 |
| H | 10.63298 | -1.17163 | 3.04780 |
| H | 11.98006 | -1.73571 | 3.83080 |
| H | 11.19707 | -0.38863 | 4.39488 |

## $\Delta G$ NH<sub>3</sub> cluster conformers

### 5 (NH<sub>3</sub>)

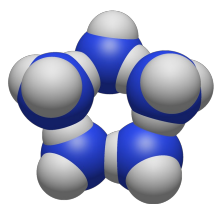

$\Delta G=0.0$  kcal/mol

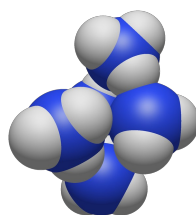

$\Delta G=0.4$  kcal/mol

### 6 (NH<sub>3</sub>)

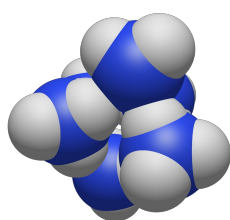

$\Delta G=0.0$  kcal/mol

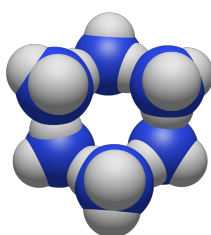

$\Delta G=0.6$  kcal/mol

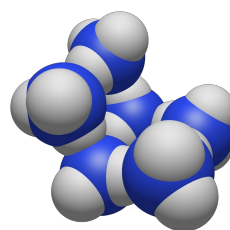

$\Delta G=1.3$  kcal/mol

**Figure S1.** Relative stability of the analyzed NH<sub>3</sub> clusters. The lower in energy were used as starting conformers for the radical-anion forms.

## Optimized Geometries Ammonia Clusters+ H<sub>2</sub>O, CH<sub>3</sub>OH, HCN, CO (Coord.=Å)

### 4mer+H<sub>2</sub>O neutral (no e- transfer)

19

Coordinates from ORCA-job OPT

|   |                   |                   |                  |
|---|-------------------|-------------------|------------------|
| N | 3.54001240950509  | 1.13232557981539  | 3.66178555192298 |
| N | 1.18916747346608  | 1.95811445771659  | 1.91946080085890 |
| O | -0.78519459377623 | 1.71156844815050  | 3.85892141595487 |
| N | 2.46282167458995  | -1.61436070832881 | 4.58953315400352 |
| N | -0.30733542828640 | -0.66977346416953 | 5.63944799222708 |
| H | 3.53840142156522  | 1.75386349942096  | 4.46087460213474 |
| H | 1.07744801937215  | 1.31683867194037  | 1.14473472470469 |
| H | -1.58828135375740 | 2.12717426029491  | 3.54809430957272 |
| H | 2.95255395210741  | -2.12261567017921 | 5.31495585659223 |
| H | -0.52360531445585 | 0.13434224478528  | 5.04922456800144 |
| H | -1.08383729349803 | -1.31406877058931 | 5.56192759663729 |
| H | 3.25117536785716  | 0.20768475938985  | 3.99857171404713 |
| H | 4.50117409757545  | 1.05761809472074  | 3.35436572113122 |
| H | 1.34687507753525  | 2.87527180071138  | 1.52225869616524 |
| H | 2.04238216522661  | 1.68838294226706  | 2.42599853390935 |
| H | -0.11857796775867 | 1.83543208223276  | 3.13786971432480 |
| H | 1.53762478749262  | -1.37224469432267 | 4.95848100034030 |
| H | 2.32047961164171  | -2.26596382895274 | 3.82815023384313 |
| H | -0.30136410640226 | -0.34054970490357 | 6.59646381362784 |

### 4mer+H<sub>2</sub>O e- (no e- transfer)

19

Coordinates from ORCA-job OPT

|   |                   |                   |                  |
|---|-------------------|-------------------|------------------|
| N | 3.08403254598391  | 1.55142481292962  | 4.28183450358638 |
| N | 1.59611178003225  | 1.14024743068023  | 1.51117990178498 |
| O | 0.04783936249642  | 1.41660568114428  | 3.91613596451872 |
| N | 1.95918085994295  | -1.47585373124649 | 3.83526897953427 |
| N | 0.06318481258334  | -0.51268435300648 | 6.19092638426008 |
| H | 2.11560451652366  | 1.82780755897627  | 4.43205937908085 |
| H | 1.95126544133588  | 0.52413718035835  | 0.78869828903936 |
| H | -0.77691882244573 | 1.91507532721624  | 3.85730103451950 |
| H | 1.90863125131499  | -2.43690512293962 | 3.52070952706321 |
| H | -0.06170580776369 | 0.17283093195202  | 5.44137310581856 |
| H | -0.86587931541402 | -0.72808771781072 | 6.53509351388899 |
| H | 3.08763285041834  | 0.53510835909524  | 4.33202325926500 |
| H | 3.62474467542159  | 1.89646145258214  | 5.06449564225475 |
| H | 1.23003995431397  | 1.96858143902624  | 1.05163053603998 |
| H | 2.37872528085758  | 1.42901828855970  | 2.09720857088967 |
| H | 0.29440994376169  | 1.20876498271733  | 2.99682128141868 |
| H | 1.36288245888103  | -1.39891894418737 | 4.65995057201962 |
| H | 1.51280254389566  | -0.91168653112888 | 3.11843186482789 |
| H | 0.53933566785974  | -0.02288704491828 | 6.93997769018804 |

### 4mer+H<sub>2</sub>O neutral (e- transfer)

19

Coordinates from ORCA-job OPT

|   |                   |                   |                  |
|---|-------------------|-------------------|------------------|
| N | -0.40246782513619 | -0.12516546656132 | 3.31298756498980 |
| N | 3.20966898996333  | -1.92790501967178 | 4.49947320338064 |
| N | 1.23007870753061  | -0.07571425482995 | 5.99269047587090 |
| H | -0.66124233036804 | -1.04380738003829 | 2.97649718249779 |
| H | 4.06410915117923  | -2.12148805009970 | 5.00522414273669 |
| H | 0.75812273107258  | -0.11106672830232 | 6.88633475865051 |
| H | -1.08232580445542 | 0.52300295166245  | 2.93755264048499 |
| H | 0.50677896043389  | 0.10426764463797  | 2.90091161272982 |

|   |                  |                   |                  |
|---|------------------|-------------------|------------------|
| H | 2.57137773057332 | -1.44753188042171 | 5.14026203387499 |
| H | 2.79613000353365 | -2.82397254559582 | 4.27577929409346 |
| N | 2.54678701704279 | 0.50337732184679  | 2.62712140151024 |
| O | 2.83491876467942 | 2.68137859923957  | 5.11151445337177 |
| H | 2.92808745845397 | -0.32819169371221 | 3.08128343520826 |
| H | 3.06420093701892 | 0.65551734817988  | 1.77181465194702 |
| H | 1.70026973658861 | 0.82034603494598  | 5.93274354479422 |
| H | 0.51661585802205 | -0.07969836453009 | 5.26189528347848 |
| H | 3.70705992938752 | 2.91775135732605  | 5.43067965365300 |
| H | 2.33725939455042 | 3.50019139048742  | 5.09855773406462 |
| H | 2.74085058992885 | 1.28402873543705  | 3.24404693266184 |

#### **4mer+H2O e- (e- transfer)**

19

Coordinates from ORCA-job OPT

|   |                   |                   |                  |
|---|-------------------|-------------------|------------------|
| N | -0.53738407410563 | 0.56824856454919  | 3.29284975800754 |
| N | 3.75383552713024  | -1.58707087259686 | 4.86905830845409 |
| N | 0.96720613582939  | -0.55890769394143 | 5.97264589581227 |
| H | -1.14520706865642 | 0.95376602558172  | 2.58091382793088 |
| H | 4.18870286036919  | -0.68254880719682 | 4.72402642333292 |
| H | 0.53034252447921  | -0.48873424090231 | 6.88259251495580 |
| H | -0.34794165981291 | 1.32187328124476  | 3.94429267771318 |
| H | 0.35543890450792  | 0.36170124380287  | 2.84049642185246 |
| H | 2.85109823758148  | -1.39369970768297 | 5.30778003858094 |
| H | 4.31924666410444  | -2.06566635252932 | 5.55916106018516 |
| N | 2.44247693302735  | 0.04291192548033  | 2.33790481598074 |
| O | 2.50194946844860  | 1.81951085945023  | 4.81879886617831 |
| H | 2.81284613985227  | -0.82874300127077 | 2.70364130260235 |
| H | 3.00762467384828  | 0.29538691459942  | 1.53748035221639 |
| H | 1.39508096792608  | 0.34494946252139  | 5.77689481543271 |
| H | 0.22353783183742  | -0.66129185152287 | 5.28893350890828 |
| H | 3.26368761260023  | 2.02195531010792  | 5.38063452554423 |
| H | 2.16316904805277  | 2.70171711231986  | 4.60947772620541 |
| H | 2.62056927297979  | 0.73996182798564  | 3.05978716010571 |

#### **4mer+CH3OH neutral (no e- transfer)**

22

Coordinates from ORCA-job OPT

|   |                   |                   |                  |
|---|-------------------|-------------------|------------------|
| H | 3.84951012436068  | 0.34712074877784  | 5.18055188069423 |
| N | 3.36071914945277  | -1.03713048528787 | 6.17683208564196 |
| N | 0.43135567453691  | -1.09120410909615 | 5.38051136399340 |
| H | 1.39595852222462  | -2.16885222718726 | 2.03648725657343 |
| H | 3.48914273239943  | -0.94293840193803 | 7.17601132546903 |
| H | -0.28244700246170 | -1.72170389051248 | 5.72216465504283 |
| C | 5.32818214303695  | 1.61922156316721  | 4.99114257594127 |
| N | 0.86496976416343  | -1.35813244169965 | 2.32836320666281 |
| H | 2.35239455788901  | -1.12874142224530 | 5.99741885206020 |
| H | 3.79845271791249  | -1.90838271256918 | 5.90618201372283 |
| N | 2.66599821590692  | 1.15066115024162  | 1.96931298397112 |
| O | 4.07908446151850  | 1.11871553043206  | 4.60569766046677 |
| H | 3.33449798464663  | 1.13656955007858  | 1.20978540669611 |
| H | 2.18112106184994  | 2.03688467136511  | 1.91101907569663 |
| H | 0.07997674533804  | -0.15223335392280 | 5.52133774250931 |
| H | 0.51106285223519  | -1.23134051224039 | 4.36780615027672 |
| H | 5.57941927401882  | 2.45950660331340  | 4.34078315307713 |
| H | 5.32790456644122  | 1.98561047732543  | 6.02593374810097 |
| H | 6.12670942197774  | 0.87152630383445  | 4.89647887356924 |
| H | 0.05607145487154  | -1.31004731616931 | 1.72201536915074 |
| H | 1.44157844301391  | -0.53302806624215 | 2.13502455872890 |
| H | 3.19648713466668  | 1.15667834057488  | 2.84210006195392 |

#### **4mer+CH3OH e- (no e- transfer)**

22

Coordinates from ORCA-job OPT

|   |                   |                   |                  |
|---|-------------------|-------------------|------------------|
| H | 3.57128256473166  | -0.19543941523306 | 5.42312182193708 |
| N | 4.25301107357938  | -1.74193893617096 | 4.95806302992226 |
| N | 0.22947146504063  | 1.29306233348457  | 4.82418350459938 |
| H | 0.51405918032410  | -2.11290900828479 | 3.16993424499102 |
| H | 4.73539177795277  | -2.26553538734399 | 5.68911690796361 |
| H | 0.40137059279621  | 1.12786669206499  | 3.83763653830558 |
| C | 4.29879130168354  | 1.57444984368066  | 5.81878296028044 |
| N | 0.71185515932415  | -1.94254872661945 | 2.18847691292990 |
| H | 3.51126921077486  | -2.35406882954831 | 4.61136766797203 |
| H | 4.91570184903848  | -1.65548131916667 | 4.18334796383255 |
| N | 2.63986689102856  | 0.75006243980771  | 2.41920199265818 |
| O | 3.21452942459482  | 0.72052505608667  | 5.59123847840789 |
| H | 3.31196774448830  | 0.08282223812389  | 2.04844646370087 |
| H | 2.91911003267737  | 1.66060960360602  | 2.07034461937199 |
| H | 1.13061057882463  | 1.13908891605495  | 5.27214086582361 |
| H | -0.36784358547393 | 0.53348057862172  | 5.12904576425877 |
| H | 3.92079441643136  | 2.59642642036232  | 5.91079072760560 |
| H | 4.83667701865958  | 1.32610992875683  | 6.74502197897299 |
| H | 5.02626652840038  | 1.55232648689329  | 4.99492547991721 |
| H | 1.49671546803165  | -2.55332045888323 | 1.97672573671009 |
| H | 1.09869326043109  | -1.00035719073178 | 2.15544679799488 |
| H | 2.79855804665973  | 0.76352873443863  | 3.42559954184301 |

#### **4mer+CH3OH neutral (e- transfer)**

22

Coordinates from ORCA-job OPT

|   |                   |                   |                  |
|---|-------------------|-------------------|------------------|
| N | -0.20433714028521 | 0.33535883022456  | 3.38595337896571 |
| N | 3.08445045891208  | -2.16536670898211 | 4.43618872908122 |
| N | 1.44989852188224  | -0.08507649994581 | 6.05911873592298 |
| H | -0.58490998105181 | -0.58800003442992 | 3.22101995981362 |
| H | 3.94670117467787  | -2.43121244444095 | 4.89399789584593 |
| H | 0.99101931720874  | -0.11554983508962 | 6.95969258126279 |
| H | -0.80193983186279 | 0.98403433293457  | 2.89001486104117 |
| H | 0.72102761827506  | 0.36298031809316  | 2.94530443792239 |
| H | 2.54019936592848  | -1.61114528446576 | 5.10321774186484 |
| H | 2.57317568329933  | -3.02083371940515 | 4.26143812035202 |
| N | 2.77273175870657  | 0.38042724850996  | 2.62973214446482 |
| O | 2.89838740361334  | 2.60443890382889  | 4.98616056081530 |
| H | 3.00861018848937  | -0.51502986388385 | 3.06098999620174 |
| H | 3.29313119438294  | 0.45372214537842  | 1.76586212968096 |
| H | 2.07685352021502  | 0.71177432547930  | 6.06495331786748 |
| H | 0.73983445705982  | 0.11261534290082  | 5.35427017668598 |
| H | 3.56873910203812  | 3.25018534483873  | 5.20978182351406 |
| C | 1.69644856902257  | 3.28084243676657  | 4.65903707865116 |
| H | 3.11367629512744  | 1.10358238490213  | 3.25377177764892 |
| H | 0.95046668408382  | 2.51643349657048  | 4.44699325517082 |
| H | 1.33920456019446  | 3.89704087394101  | 5.49009351367051 |
| H | 1.81496108008201  | 3.91072840627434  | 3.77166778355434 |

#### **4mer+CH3OH e- (e- transfer)**

22

Coordinates from ORCA-job OPT

|   |                   |                   |                  |
|---|-------------------|-------------------|------------------|
| N | -0.52484816585794 | 0.31778881048942  | 3.19999805536685 |
| N | 3.41488516617641  | -2.05042411745110 | 4.64461902785279 |
| N | 1.27053152780927  | -0.18384683753089 | 5.88531620462715 |
| H | -1.00786077569268 | -0.37376476377095 | 2.64034710968002 |



|   |                   |                   |                  |
|---|-------------------|-------------------|------------------|
| H | 4.25703813792482  | -1.52617654100709 | 4.85639244494040 |
| H | 0.90840824335165  | -0.06673887768244 | 6.82274987774275 |
| H | -0.91670523546016 | 1.21786489310207  | 2.95246160526759 |
| H | 0.45658007095867  | 0.32136755844494  | 2.89386203809740 |
| H | 2.65640643267565  | -1.57608136518139 | 5.14501492700509 |
| H | 3.52872188089774  | -2.96234926658476 | 5.06916738178660 |
| N | 2.48528115075604  | 0.28535568646505  | 2.62193349056748 |
| O | 2.88554303738351  | 2.23411908499610  | 4.92452326118295 |
| H | 2.79612298457868  | -0.62596142726685 | 2.95148086581326 |
| H | 3.01610223393818  | 0.49583865535481  | 1.78614759040722 |
| H | 1.89275127920991  | 0.60456375717814  | 5.71385591822796 |
| H | 0.49299003860679  | -0.07599785411357 | 5.23777506613584 |
| H | 3.70677130627159  | 2.60568689550922  | 5.27512925973672 |
| C | 1.92605739934870  | 3.24936821081765  | 4.76226463744862 |
| H | 2.78709148569138  | 0.95576366675019  | 3.32826654099485 |
| H | 1.01036625513606  | 2.76483031301869  | 4.41670296226285 |
| H | 1.71288571405674  | 3.76841250594394  | 5.70304028007021 |
| H | 2.23320983223865  | 3.99233101251869  | 4.01821145478461 |

### **8mer+H2O neutral (no e- transfer)**

35

Coordinates from ORCA-job OPT

|   |                   |                   |                  |
|---|-------------------|-------------------|------------------|
| N | -0.79638621887357 | 0.06065491429765  | 3.06754796758503 |
| N | 3.27439548732735  | -1.70842475165128 | 5.67401292828136 |
| N | 0.70365640603206  | 0.13447161864912  | 5.78432047617193 |
| H | -1.07395244282335 | -0.89593310042565 | 2.86502712455854 |
| H | 3.80430258865067  | -1.93854357698028 | 6.50408799149194 |
| H | 0.22006487585843  | 0.60341692826429  | 6.53929558499809 |
| H | -1.54072785513240 | 0.66625068338052  | 2.74835865599845 |
| H | 0.02523444227122  | 0.26037652923178  | 2.50347297152058 |
| H | 2.34330529458267  | -1.42112682020234 | 5.97039446545488 |
| H | 3.16230699482651  | -2.56496396790069 | 5.13207068330422 |
| N | 2.11550122975785  | 1.09569021318908  | 1.95980209533028 |
| O | 3.71565873430942  | 0.70030840529574  | 4.46765467486356 |
| H | 2.72283374123562  | 1.17021246691331  | 1.15353227938074 |
| H | 1.63486486684812  | 1.98341192907000  | 2.03642765171999 |
| H | 1.53688816953810  | 0.67763982985637  | 5.58275149045618 |
| H | 0.10786769157137  | 0.19798659885754  | 4.95359984435766 |
| N | -1.04790134941782 | -3.01937492325013 | 2.06922211031038 |
| N | 2.29282081075684  | -4.35449857995842 | 4.30559888280498 |
| N | -0.27814372690999 | -2.94343125656332 | 5.21082871272524 |
| H | -1.13675608298540 | -4.01304843253153 | 2.24027883899178 |
| H | 2.60823298762283  | -5.07466782479938 | 4.94289690814738 |
| H | -0.94898474423500 | -3.28218340948171 | 5.88775794868254 |
| H | -1.55442410855962 | -2.82759460607125 | 1.21442467110118 |
| H | -0.05707232450334 | -2.82449005792938 | 1.89162961013580 |
| H | 1.38275588426513  | -4.01999524698725 | 4.64314158749828 |
| H | 2.14032678069876  | -4.80554260530412 | 3.41255096523170 |
| N | 1.91754716733291  | -2.16547699723847 | 1.87908402315776 |
| H | 1.90990861075834  | -1.14835922563655 | 1.91060702880703 |
| H | 2.33833751262599  | -2.49383661709885 | 2.74187853949494 |
| H | 2.54468732967178  | -2.43111775607325 | 1.13079255735198 |
| H | 0.03135505367749  | -2.02642326202287 | 5.52551853840545 |
| H | -0.77678287179787 | -2.80001456379544 | 4.33683951444155 |
| H | 2.71449112872474  | 1.01191005019376  | 2.78269992937862 |
| H | 4.59440857918571  | 1.03368124729386  | 4.64471050304197 |
| H | 3.68042360221294  | -0.21145672941196 | 4.86769388759597 |

### **8mer+H2O neutral (geometry for e- transfer)**

35

Coordinates from ORCA-job OPT

|   |                   |                   |                  |
|---|-------------------|-------------------|------------------|
| N | 0.07782963132450  | 0.61521465623327  | 3.10602982678924 |
| N | 3.51133888331847  | -2.00350928066188 | 4.68220435808423 |
| N | 1.17680185018644  | -0.28719527550231 | 6.23782693329606 |
| H | -0.48679728432284 | -0.21960032986093 | 3.23992291799280 |
| H | 4.33599840972173  | -2.19135088771246 | 5.23623917313488 |
| H | 0.61008816672845  | -0.26704892768183 | 7.07645779760322 |
| H | -0.40577870981654 | 1.18012393743255  | 2.41827734252993 |
| H | 0.95682565985649  | 0.31564206215866  | 2.67883004055239 |
| H | 2.79396576085372  | -1.64944773575019 | 5.30966132403879 |
| H | 3.18295637328420  | -2.89107303470144 | 4.31226902153914 |
| N | 3.11736345444451  | 0.22249683658527  | 2.59249548324764 |
| O | 1.74290750629479  | 2.35621964622901  | 4.58120527705442 |
| H | 3.42850496467853  | -0.48907990757993 | 3.26106409257678 |
| H | 3.85093063481469  | 0.33811030486047  | 1.90548522771462 |
| H | 1.85832939238358  | 0.45744614012391  | 6.33152356505051 |
| H | 0.57815870486585  | 0.01476252748636  | 5.47580156444330 |
| N | -1.34513344519508 | -2.23500385653081 | 2.45936593346937 |
| N | 2.02689720150955  | -4.79783042227887 | 3.81390100600711 |
| N | -0.10219903573817 | -3.12869617632450 | 5.28740493699552 |
| H | -1.76806055219257 | -3.15354496858583 | 2.51317526748945 |
| H | 2.58028713773384  | -5.37212834536716 | 4.43728619445641 |
| H | -0.76470569947994 | -3.44934411668385 | 5.98124913287078 |
| H | -1.90696295422275 | -1.70802696919551 | 1.80240969402573 |
| H | -0.41225430078606 | -2.35093739002114 | 2.04463240311712 |
| H | 1.27150530017722  | -4.37999488367082 | 4.36711482941945 |
| H | 1.59983875352211  | -5.43176128072404 | 3.15002099417149 |
| N | 1.57371274372432  | -2.48234423859826 | 1.56942885700393 |
| H | 2.01456619825833  | -1.59554900160562 | 1.80284597881946 |
| H | 1.96160256956526  | -3.17761655497939 | 2.20273087170608 |
| H | 1.87979819639160  | -2.72535997347009 | 0.63621986577476 |
| H | 0.45970893424650  | -2.40209457907437 | 5.72201170698495 |
| H | -0.63169278090965 | -2.68460726983565 | 4.54073972970119 |
| H | 3.05142772373584  | 1.09460978062028  | 3.10873250813896 |
| H | 1.02552383073720  | 1.83301077500056  | 4.16333608810980 |
| H | 1.46776102541000  | 3.27101584284596  | 4.53261169886712 |

### **8mer+H2O e- (geometry after e- transfer)**

35

Coordinates from ORCA-job OPT

|   |                   |                   |                  |
|---|-------------------|-------------------|------------------|
| N | -0.53103766686590 | 0.30681396073430  | 3.35016967310415 |
| N | 3.59694332349922  | -1.69500439910778 | 4.67342266790291 |
| N | 0.99881028238531  | -0.24604127769706 | 6.00287675067245 |
| H | -1.10704047841749 | -0.43141937171707 | 2.96169428042548 |
| H | 4.40568675846053  | -1.50414312705114 | 5.24951667367132 |
| H | 0.59371428847830  | -0.08868015951932 | 6.91757490320856 |
| H | -0.94432916270212 | 1.19848678397024  | 3.11251500524952 |
| H | 0.37743492817756  | 0.26266666129314  | 2.89136379043098 |
| H | 2.77538732728716  | -1.40908264332393 | 5.20323956743468 |
| H | 3.53240768145788  | -2.69534822334418 | 4.52362369809891 |
| N | 2.60352334967625  | 0.27603739230569  | 2.48214001348025 |
| O | 2.60883175494241  | 2.03552775407514  | 4.90894015476799 |
| H | 3.16213126702681  | -0.37348186238888 | 3.04018116652688 |
| H | 3.18421180242077  | 0.59619671200613  | 1.71670462229430 |
| H | 1.71668487710998  | 0.46818289346429  | 5.88178105950948 |
| H | 0.29151534737860  | 0.00108490143273  | 5.30715592642833 |
| N | -1.46534781420428 | -2.64951016036569 | 1.97183372991047 |

|   |                   |                   |                  |
|---|-------------------|-------------------|------------------|
| N | 2.24898896946467  | -4.76476406921045 | 4.12892536940203 |
| N | -0.09850804388159 | -3.02671630480597 | 5.00171254072078 |
| H | -1.81448764697116 | -3.59960744170034 | 1.96961097737185 |
| H | 2.71651899312096  | -5.16368773302126 | 4.93322655647250 |
| H | -0.77765924826517 | -3.28850848464820 | 5.70493421472151 |
| H | -1.89802107049305 | -2.18033298765797 | 1.18616005449420 |
| H | -0.45515617825967 | -2.69294874970589 | 1.78262384266091 |
| H | 1.41968639121077  | -4.26398386444263 | 4.47478996475209 |
| H | 1.91959693709528  | -5.54223149469972 | 3.57063743281579 |
| N | 1.56594481708029  | -2.59807951374411 | 1.68134538903364 |
| H | 1.77015595284653  | -1.62443212303936 | 1.91400617201255 |
| H | 1.99663273892165  | -3.16245768420081 | 2.40882269711770 |
| H | 2.06730069225693  | -2.79849448603857 | 0.82535775769471 |
| H | 0.37580988166441  | -2.19284968226221 | 5.35406614371470 |
| H | -0.62669395063834 | -2.73118906247026 | 4.18509053398999 |
| H | 2.48072249571011  | 1.07702620969556  | 3.10139611978141 |
| H | 2.09609400949450  | 2.83483376372883  | 5.08519540111919 |
| H | 3.52459063863645  | 2.29164497663565  | 5.07787679178574 |

### **8mer+CH3OH neutral (geometry no e- transfer)**

38

Coordinates from ORCA-job OPT

|   |                   |                   |                  |
|---|-------------------|-------------------|------------------|
| N | -0.89913689344135 | 0.02534198664998  | 3.07416233046607 |
| N | 3.19100448078251  | -1.61853303120533 | 5.78597399265371 |
| N | 0.55067514607104  | 0.13284729540164  | 5.81692225903390 |
| H | -1.10964697966467 | -0.94194215753209 | 2.84341595472031 |
| H | 3.73189996421898  | -1.80875035888841 | 6.61895208573685 |
| H | 0.05011808372644  | 0.59111999595337  | 6.56732841070131 |
| H | -1.67309385036798 | 0.59002487681199  | 2.75045703471106 |
| H | -0.07898130404406 | 0.29120134956023  | 2.53575375896458 |
| H | 2.24429844093069  | -1.38141164166927 | 6.07579153487979 |
| H | 3.13033539283090  | -2.48517897919803 | 5.25050092370770 |
| N | 1.97693496072457  | 1.25679330095033  | 2.08624530137023 |
| O | 3.55725816759985  | 0.78258180761807  | 4.56753294324165 |
| H | 2.59270390867568  | 1.40831421503463  | 1.29744548254893 |
| H | 1.45858095857194  | 2.11713458168767  | 2.21237846323776 |
| H | 1.37538687879700  | 0.69208702895692  | 5.62374185443043 |
| H | -0.03731584450744 | 0.18409667824602  | 4.97994661420763 |
| N | -0.91016238328648 | -3.04490182854909 | 2.01860442162667 |
| N | 2.37796649652291  | -4.26303378628784 | 4.34237867679998 |
| N | -0.27802532306426 | -2.97951023666212 | 5.19167482559108 |
| H | -0.94603727062559 | -4.04496746523507 | 2.17055861300677 |
| H | 2.67394176536082  | -5.02922280535630 | 4.93351197226690 |
| H | -0.94951920997698 | -3.35437976430698 | 5.84868316996384 |
| H | -1.39751948583045 | -2.86732834102689 | 1.14966637039361 |
| H | 0.07255687175013  | -2.78930739406370 | 1.87848071544634 |
| H | 1.44190501723059  | -3.97631017798544 | 4.65124394930206 |
| H | 2.28831824713947  | -4.63666970694400 | 3.40612760072864 |
| N | 2.00519144821691  | -2.00623595692488 | 1.95843222282622 |
| H | 1.90925597374499  | -0.99337616770120 | 1.97520595187270 |
| H | 2.39873766905109  | -2.28681708217944 | 2.84999565561118 |
| H | 2.69833359198465  | -2.22462021517395 | 1.25445562967406 |
| H | -0.02469181498010 | -2.04938670888634 | 5.51818474855081 |
| H | -0.75902530286264 | -2.85705644620334 | 4.30471217078813 |
| H | 2.56478576106779  | 1.13898724015187  | 2.91394179955506 |
| C | 4.80488033531992  | 1.35269198650014  | 4.85553439230882 |
| H | 3.51808350572324  | -0.12996452743604 | 4.96487623151020 |
| H | 4.83540656858736  | 2.35589905767190  | 4.42569545795506 |
| H | 5.63386920421720  | 0.77571045959436  | 4.42686590900954 |
| H | 4.97771682380475  | 1.44539291862706  | 5.93518057059877 |

**8mer+CH3OH e- (no e- transfer)**

38

Coordinates from ORCA-job OPT

|   |                   |                   |                   |
|---|-------------------|-------------------|-------------------|
| N | -0.73166225455182 | 0.07315288453784  | 2.97593477093497  |
| N | 3.37203936525904  | -1.61886626782300 | 5.59117209238999  |
| N | -0.00833784104601 | 0.77459691125128  | 5.95929781700344  |
| H | -0.88452798123837 | -0.93255750302073 | 2.96403251881314  |
| H | 3.86308537291341  | -2.13967936823026 | 6.31065940252443  |
| H | -0.53424777946868 | 1.47189015157819  | 6.46865529221063  |
| H | -1.25863929614877 | 0.45945497937587  | 2.20295975682137  |
| H | 0.25660304119614  | 0.20690104886616  | 2.75479678903064  |
| H | 2.39888703202555  | -1.94143606229929 | 5.60870807449879  |
| H | 3.77007167944719  | -1.92637493629541 | 4.70328572727922  |
| N | 2.42063846543149  | 0.29759639788932  | 2.62730354413368  |
| O | 3.15417202532840  | 1.09051835567331  | 5.70459043055233  |
| H | 2.55302852920621  | 0.67862278525714  | 3.56257374216024  |
| H | 2.85696061433736  | -0.62523923105059 | 2.63247414693963  |
| H | 0.95717380863740  | 1.08709596526335  | 5.91931295437879  |
| H | -0.36831392515360 | 0.74694471618300  | 5.00398924432092  |
| N | -0.63384271977129 | -3.25810799924411 | 2.55394606266794  |
| N | 1.91852165947196  | -4.68830359483375 | 3.74241796992067  |
| N | 0.29839112932626  | -2.34194384773645 | 5.63337032390549  |
| H | 0.09231752684240  | -3.92242868994346 | 2.82760376439191  |
| H | 2.62176868622257  | -4.22273984541811 | 3.16523147024812  |
| H | -0.16804707314463 | -2.95069166064004 | 6.29343106177425  |
| H | -1.47694228921010 | -3.79515343518473 | 2.38948192908061  |
| H | -0.34790409850568 | -2.87890553294747 | 1.65348883465705  |
| H | 1.79184117082330  | -4.08226019084948 | 4.55016508761719  |
| H | 2.35929667914562  | -5.53632255610556 | 4.08468355604069  |
| N | 1.19412527254130  | -1.85852054576477 | 0.26940546165623  |
| H | 1.20939336008831  | -1.10847985154443 | 0.95685330767994  |
| H | 1.89162270565430  | -2.52165542885471 | 0.60690016659852  |
| H | 1.58763477690688  | -1.46318459235992 | -0.57848969640451 |
| H | 0.07855458500778  | -1.37820653323198 | 5.89081600954753  |
| H | -0.12230181267280 | -2.51795356587525 | 4.72326303829383  |
| H | 2.98635506719605  | 0.85511967544242  | 1.99584193706391  |
| C | 4.39824752446379  | 1.67664446855265  | 5.45230446902908  |
| H | 3.27359576944029  | 0.09761092150245  | 5.72093581586858  |
| H | 4.25789237850658  | 2.75281080938094  | 5.31755741746721  |
| H | 4.86556596155371  | 1.28195784673361  | 4.53867659391054  |
| H | 5.10397288393731  | 1.52941332176675  | 6.28292911499007  |

**8mer+CH3OH neutral (geometry e- transfer)**

38

Coordinates from ORCA-job OPT

|   |                   |                   |                  |
|---|-------------------|-------------------|------------------|
| N | -0.61709267518843 | 0.06036759454156  | 3.18260700314665 |
| N | 3.37100470616109  | -1.48902764960216 | 4.74174471880195 |
| N | 0.81051189329561  | 0.06360653205568  | 5.91315816604621 |
| H | -0.97917092863649 | -0.86461380051783 | 2.96848584667674 |
| H | 4.12787536140654  | -1.62601011912090 | 5.39895368759489 |
| H | 0.23083500098782  | 0.17969128800309  | 6.73432416462726 |
| H | -1.26156212406697 | 0.73680500425304  | 2.79614284601089 |
| H | 0.26799525052748  | 0.16208409785471  | 2.69152607238572 |
| H | 2.55746054853251  | -1.18661828797824 | 5.27658982443758 |
| H | 3.15217616929522  | -2.40236640888175 | 4.35263488965839 |
| N | 2.53566904791675  | 0.47286528917914  | 2.47704577229323 |
| O | 2.88021273886549  | 2.42893437847149  | 5.12499224656339 |
| H | 2.99644296923286  | -0.15435750193530 | 3.14087914173156 |
| H | 3.19790581041507  | 0.67683793677910  | 1.73966694060726 |

|   |                   |                   |                  |
|---|-------------------|-------------------|------------------|
| H | 1.43077785368650  | 0.86612679296410  | 5.87332109913292 |
| H | 0.20061114755082  | 0.13685104099535  | 5.09295440490593 |
| N | -1.35622035962560 | -2.95457728625310 | 2.17865918032464 |
| N | 2.29942024255650  | -4.48625641612683 | 3.95824212017472 |
| N | -0.10167263712105 | -3.02537167844596 | 5.17439484306930 |
| H | -1.55810036704652 | -3.93632274311507 | 2.32001211559455 |
| H | 2.89416142250592  | -4.90714101415100 | 4.66074188211727 |
| H | -0.70355848367966 | -3.34814039951228 | 5.92039467690161 |
| H | -1.97723265070949 | -2.63669623157577 | 1.44542987878518 |
| H | -0.39664500768224 | -2.88484296162562 | 1.82123876947891 |
| H | 1.46467937490405  | -4.12742022878282 | 4.43625279768933 |
| H | 2.00089264352175  | -5.23812714030421 | 3.34966208242578 |
| N | 1.60126095019389  | -2.51318737808449 | 1.49495955995875 |
| H | 1.76026556186160  | -1.53078151768260 | 1.70368408467617 |
| H | 2.07609603501106  | -3.05188750533180 | 2.21555220658161 |
| H | 2.06395318486565  | -2.71032236675173 | 0.61745264208527 |
| H | 0.29052779936463  | -2.13575982142268 | 5.47157329764279 |
| H | -0.69245117888711 | -2.83543596750329 | 4.36869927020908 |
| H | 2.38057621466483  | 1.33942233386942  | 2.98019086206511 |
| H | 2.79116936231539  | 3.33924019195927  | 5.40753685063372 |
| C | 4.22818122898196  | 2.02362363115481  | 5.28727826419500 |
| H | 4.28769423964116  | 0.98980372113666  | 4.95024675775662 |
| H | 4.91013817916562  | 2.62916802007500  | 4.68181322953280 |
| H | 4.54266147521521  | 2.07246657141347  | 6.33484780347970 |

### **8mer+CH3OH e- (geometry e- transfer)**

38

Coordinates from ORCA-job OPT

|   |                   |                   |                  |
|---|-------------------|-------------------|------------------|
| N | -0.68704182406367 | 0.09365278230247  | 3.26889318012943 |
| N | 3.52687382520780  | -1.66147621458627 | 4.72690879833640 |
| N | 1.03062929272721  | -0.00128068221859 | 5.86740985657959 |
| H | -1.11586631998637 | -0.72729726241508 | 2.85562694028036 |
| H | 4.31106581200632  | -1.70913613630921 | 5.36390118697618 |
| H | 0.64596126006808  | 0.16991638164487  | 6.78877662786604 |
| H | -1.23121678667001 | 0.90513715206643  | 3.00762066773659 |
| H | 0.23956931103849  | 0.20381538129701  | 2.85963977457728 |
| H | 2.74309939978076  | -1.25275078541720 | 5.23798677037832 |
| H | 3.27325805190831  | -2.61319707533520 | 4.48246524489386 |
| N | 2.48178940584970  | 0.41135240288939  | 2.59950293358606 |
| O | 2.75914331067185  | 2.34922933506988  | 4.92596533411471 |
| H | 3.05749884707342  | -0.25262657117338 | 3.11932978577926 |
| H | 3.03158420009211  | 0.73574716603529  | 1.81326361585503 |
| H | 1.61396294337192  | 0.80921425136355  | 5.66033436548579 |
| H | 0.25830345190683  | 0.06580919883189  | 5.20107243990681 |
| N | -1.40012170267055 | -2.93684436382869 | 2.02443548591033 |
| N | 2.20550799792307  | -4.67432530089042 | 3.99786605809350 |
| N | -0.04894909245834 | -2.94533924646620 | 5.07654127893750 |
| H | -1.60229081725058 | -3.91649422698009 | 2.17995979487185 |
| H | 2.68066739425294  | -5.17197464271298 | 4.74009742050283 |
| H | -0.66958214827358 | -3.17191264380743 | 5.84313098635675 |
| H | -1.92808158021070 | -2.65658562910238 | 1.20761654179625 |
| H | -0.40304578998782 | -2.86206833523003 | 1.78686488367030 |
| H | 1.39773867882286  | -4.19443735163213 | 4.41635811661243 |
| H | 1.84568899089030  | -5.37421644303689 | 3.36110084530508 |
| N | 1.59426909819619  | -2.49866580771569 | 1.61113210639810 |
| H | 1.71606195218507  | -1.52434682784537 | 1.88858495365890 |
| H | 2.06818041550448  | -3.06009616705391 | 2.31383715694569 |
| H | 2.10798123798557  | -2.61828403611459 | 0.74747106879308 |
| H | 0.43368062948972  | -2.08721663742067 | 5.34174038184082 |
| H | -0.63971394563939 | -2.70292060016830 | 4.28578905595031 |

|   |                  |                  |                  |
|---|------------------|------------------|------------------|
| H | 2.38694186579695 | 1.21274588422150 | 3.22297239556940 |
| H | 2.49966784819874 | 3.27306799407858 | 5.04656578240114 |
| C | 4.10867367683595 | 2.17824221384867 | 5.28555464210314 |
| H | 4.37126058076692 | 1.14543585499627 | 5.04774986317355 |
| H | 4.77047028833634 | 2.84645084972988 | 4.72430037759555 |
| H | 4.27383024032281 | 2.34630613908527 | 6.35552328103103 |

### **8mer+HCN Neutral**

35

Coordinates from ORCA-job OPT

|   |                   |                   |                   |
|---|-------------------|-------------------|-------------------|
| N | -2.89852439879609 | 1.59855283385812  | -0.35024673842149 |
| N | -3.93418945930831 | 2.94735737165121  | 3.57152224169655  |
| N | -5.10538848352201 | 3.44525588093563  | 0.71123555222493  |
| H | -3.22958339437463 | 0.63992764396229  | -0.28024295895402 |
| H | -4.48035655140204 | 3.31938933540961  | 4.33921166779754  |
| H | -5.94198502368020 | 3.41534349557025  | 0.14209141579574  |
| H | -2.50171824572406 | 1.71456544470679  | -1.27336358888418 |
| H | -2.14088994032941 | 1.70086540156441  | 0.31920219022958  |
| H | -4.52690982822935 | 2.98371011742372  | 2.73921655134547  |
| H | -3.78408823293605 | 1.96418641640392  | 3.78584430172830  |
| N | -0.94847141497557 | 2.55225248871772  | 2.11378414268854  |
| H | -0.14831668757628 | 2.45912290337851  | 2.72664726251749  |
| H | -0.79299540231187 | 3.39056274251309  | 1.56698727972896  |
| H | -4.79825414001533 | 4.41084542142414  | 0.70851156934395  |
| H | -4.38437764676330 | 2.89838966236908  | 0.22632202357023  |
| N | -3.53075838139068 | -1.54726006782888 | 0.25282017386987  |
| N | -4.41794886203587 | -0.19116176118813 | 4.32536592678784  |
| N | -5.79015073258881 | 0.30665241577577  | 1.62752181623217  |
| H | -4.10594151804356 | -2.33292195276027 | 0.53018089369542  |
| H | -4.95591331886802 | 0.16655092743144  | 5.10472659774370  |
| H | -6.73686367583533 | 0.05945586699811  | 1.37144372143830  |
| H | -2.98565373120522 | -1.86146860340967 | -0.54015065271140 |
| H | -2.87645599501370 | -1.36076739632712 | 1.02061337255706  |
| H | -4.99779188943737 | -0.09937379022211 | 3.48337051143487  |
| H | -4.29686483495702 | -1.18146996535896 | 4.49898592728642  |
| N | -1.75982967604703 | -0.56169110948682 | 2.56721384729997  |
| H | -1.35792914619135 | 0.31091746102584  | 2.23643030379111  |
| H | -2.45031771445059 | -0.32002677752188 | 3.27480262083379  |
| H | -1.02164114747113 | -1.07923906884313 | 3.02569357191463  |
| H | -5.68741166539224 | 1.30398459277774  | 1.46942756580941  |
| H | -5.16456573488210 | -0.16556683152897 | 0.97831631757060  |
| H | -1.75528775214627 | 2.73410497347860  | 2.70476420272788  |
| N | -2.25374236007611 | 6.42098157685131  | 1.94353525003497  |
| C | -2.62706832361997 | 5.49344629315631  | 2.50693794746979  |
| H | -2.98692469040121 | 4.59010605709160  | 3.00880717180502  |

### **8mer+HCN e-**

35

Coordinates from ORCA-job OPT

|   |                   |                  |                   |
|---|-------------------|------------------|-------------------|
| N | -3.52565849913367 | 1.40724978954830 | -0.72486775136796 |
| N | -4.97602942040773 | 3.45402212036271 | 3.76687722757962  |
| N | -3.16857964098806 | 3.87275710637895 | 1.15007940084012  |
| H | -4.10679237617463 | 0.59156017786218 | -0.55666691289843 |
| H | -5.90952896510937 | 3.50564730710962 | 3.37541169818567  |
| H | -3.54906265586477 | 4.73795765603240 | 0.78313062137595  |
| H | -3.53005506759258 | 1.56265843416947 | -1.72766498128584 |
| H | -2.57367136526684 | 1.11755771510611 | -0.50052887259512 |
| H | -4.33421525759678 | 3.61073060674787 | 2.98612855328780  |
| H | -4.85094906788650 | 2.48121786927941 | 4.06396562330803  |
| N | -0.35818377850467 | 0.52979219072607 | -0.27978628096490 |

|   |                   |                   |                   |
|---|-------------------|-------------------|-------------------|
| H | 0.38556745192668  | 0.02013305833016  | 0.20040694198828  |
| H | -0.53778132357737 | 0.00394683316754  | -1.13839058245584 |
| H | -2.15869463865975 | 3.96274519090267  | 1.09130669860943  |
| H | -3.42110102882659 | 3.13098535584331  | 0.48934412000965  |
| N | -3.26638574613903 | -1.59419790190425 | 1.15804223351983  |
| N | -4.54856435152219 | 0.40414359262527  | 4.24358401951419  |
| N | -6.02568930240378 | -0.14318219240630 | 1.49094048479679  |
| H | -3.13082572557895 | -2.46701646397473 | 1.65552892129747  |
| H | -4.51024443480549 | -0.23857367297871 | 5.02358471605883  |
| H | -6.77220787786402 | -0.41542671182540 | 0.86405660746207  |
| H | -2.70801800236612 | -1.65649710880610 | 0.31107374647200  |
| H | -2.82917482645119 | -0.86669544937343 | 1.72397947314026  |
| H | -5.23878238222516 | 0.05090755739587  | 3.58360027882303  |
| H | -3.65065818958977 | 0.35988968995247  | 3.76447152650100  |
| N | -1.90115328901229 | 1.03178209698424  | 2.51752741756216  |
| H | -1.41818550354332 | 0.89406906459757  | 1.62768867790482  |
| H | -2.38977087916762 | 1.91899655820468  | 2.43932342252530  |
| H | -1.17642775770001 | 1.16194792260325  | 3.21443825191926  |
| H | -5.77061128187948 | 0.80679186917780  | 1.24423230027441  |
| H | -5.21283579738165 | -0.72453501407728 | 1.27033188095314  |
| H | 0.05442142568819  | 1.41691741684320  | -0.57636491030515 |
| N | -4.71338261161781 | 6.16126354690267  | 6.81619118314706  |
| C | -4.74931225918376 | 5.39277597355009  | 5.96199222771821  |
| H | -4.80256557358925 | 4.64325781494039  | 5.12456203709630  |

### **8mer+CO Neutral**

34

Coordinates from ORCA-job OPT

|   |                   |                   |                  |
|---|-------------------|-------------------|------------------|
| N | -0.51713267805361 | 0.12792579897347  | 3.15290513306194 |
| N | 3.08957635326103  | -1.12475798839973 | 4.85905063240923 |
| N | 0.36746870759388  | 0.10734457150261  | 6.08845756870422 |
| H | -0.87643667374979 | -0.80298445239726 | 2.95844166656753 |
| H | 3.88766867639518  | -1.11103019390324 | 5.48037227579406 |
| H | -0.41879244016344 | 0.06982521699831  | 6.72489120902309 |
| H | -1.16085402496093 | 0.79033154700780  | 2.74086869121885 |
| H | 0.36761096129990  | 0.21573706669723  | 2.65883070874791 |
| H | 2.26198479039496  | -0.93130668832719 | 5.41925755948662 |
| H | 2.99965522783474  | -2.07437522073826 | 4.50745239328964 |
| N | 2.59545424882429  | 0.57997657498926  | 2.34775617185759 |
| O | 3.15965823249952  | 2.45106936310124  | 5.44380960847910 |
| H | 3.38522310733408  | 0.58005730257050  | 1.71500290629474 |
| H | 2.42691602692121  | 1.54650095053678  | 2.59654350557478 |
| H | 0.87142383054244  | 0.95650425461289  | 6.31156986120775 |
| H | -0.01072473962699 | 0.22097446576139  | 5.14070970500045 |
| N | -1.23664652518158 | -2.89859505993650 | 2.16354790535872 |
| N | 2.42550191478733  | -4.25124308269243 | 4.14739678773658 |
| N | -0.17250346615593 | -3.02171287333798 | 5.22104532586316 |
| H | -1.44545138977590 | -3.88169007785709 | 2.28530872281521 |
| H | 3.03315310860012  | -4.57610066174364 | 4.88881147507569 |
| H | -0.82497011556824 | -3.43774948929956 | 5.87229674210819 |
| H | -1.83888178638170 | -2.57020723424196 | 1.41922788633886 |
| H | -0.26849543880307 | -2.83015259834998 | 1.82899901138037 |
| H | 1.53514916882983  | -3.97650732052863 | 4.57753524362398 |
| H | 2.24188628321588  | -5.05305741509718 | 3.55729346834024 |
| N | 1.73376566621541  | -2.46679996304922 | 1.54291059598732 |
| H | 1.88487428367225  | -1.46836872764487 | 1.66065720436832 |
| H | 2.18995209557762  | -2.93227455178407 | 2.32430594377653 |
| H | 2.21854008927897  | -2.74563517492702 | 0.70015019772458 |
| H | 0.11776313187734  | -2.13080823120746 | 5.61402137403065 |
| H | -0.68456627988322 | -2.81811552298791 | 4.36578191310114 |

|   |                  |                  |                  |
|---|------------------|------------------|------------------|
| H | 2.88281505483213 | 0.08817352694720 | 3.20094479603417 |
| C | 4.05850554204602 | 1.85604800914261 | 5.76294614391424 |

### **8mer+CO e-**

34

Coordinates from ORCA-job OPT

|   |                   |                   |                  |
|---|-------------------|-------------------|------------------|
| N | -0.68123634847773 | 0.06773992365099  | 3.34166558048371 |
| N | 3.10583534532547  | -2.44491563016639 | 6.80946832336011 |
| N | 0.79248619973511  | -0.07717210611898 | 6.08545984990952 |
| H | -1.07434100514306 | -0.83171301391957 | 3.08041863216564 |
| H | 3.96731904451069  | -2.02475274218533 | 6.47468477406587 |
| H | 0.35156483456544  | 0.34845358254486  | 6.89275583540284 |
| H | -1.24594625149383 | 0.78492176523635  | 2.90497494776218 |
| H | 0.24803876803252  | 0.12490598814691  | 2.92401082028407 |
| H | 2.84364230238609  | -3.12189618441851 | 6.10040685417972 |
| H | 2.40470856182972  | -1.71058149346470 | 6.73340308937721 |
| N | 2.45177785258317  | 0.25436586945565  | 2.59386959862491 |
| O | 4.52338472327847  | 3.97794122251224  | 4.31893944608745 |
| H | 2.57521135130074  | 1.18482131116900  | 3.00226039730507 |
| H | 2.77750273301202  | -0.38388561035438 | 3.31873787540815 |
| H | 1.63651349053525  | 0.46029456595175  | 5.90279094902338 |
| H | 0.17787096095914  | 0.08523884586728  | 5.28275119102722 |
| N | -1.60541957709455 | -2.94364118366128 | 2.14870008210389 |
| N | 2.65966666950592  | -3.97647898715500 | 3.19070802956207 |
| N | 0.20536683587743  | -3.09663246837115 | 4.94165355360855 |
| H | -1.71783484378005 | -3.94730316365485 | 2.22640457922174 |
| H | 3.39359536375734  | -3.29842854299738 | 3.37203500243084 |
| H | -0.22912588265515 | -3.66743949706165 | 5.65603209792060 |
| H | -2.37270510516604 | -2.60961724388057 | 1.57852567185477 |
| H | -0.73787935912311 | -2.77896168395568 | 1.62177423175039 |
| H | 1.88312776246920  | -3.74332686019238 | 3.81785149298479 |
| H | 3.02109341499502  | -4.87759803486274 | 3.48004207391677 |
| N | 1.13580168549470  | -2.35529891559440 | 0.95691788960960 |
| H | 1.34756268634113  | -1.43858238619666 | 1.34597485379536 |
| H | 1.68802133026173  | -3.02247315213442 | 1.49889994293371 |
| H | 1.50160116280106  | -2.36111367554453 | 0.01286865868541 |
| H | 0.41023640031391  | -2.19599105458023 | 5.37268197581728 |
| H | -0.49605844942197 | -2.92935603919113 | 4.22481366345687 |
| H | 3.15274965903555  | 0.19456284864101  | 1.85876157267052 |
| C | 3.60030285429585  | 3.67346032288789  | 3.70382948031454 |

### **15mer+H2O Neutral (no e- conformer)**

59

Coordinates from ORCA-job OPT

|   |                  |                   |                   |
|---|------------------|-------------------|-------------------|
| N | 1.38298289200424 | 2.68373025236369  | 0.04618188200836  |
| H | 2.23721832450191 | 2.13264408194299  | 0.07106427173126  |
| H | 0.82563806724137 | 2.39394446967059  | 0.84021405250057  |
| H | 0.87346184885756 | 2.41498018481307  | -0.78532881535098 |
| N | 1.77354707713967 | 2.06065546723728  | 6.21903081516298  |
| N | 2.37435462488944 | 0.62836312979409  | 3.12157173089063  |
| H | 1.67871910642082 | 1.66105698460979  | 5.29105240831294  |
| H | 1.72299513709779 | -0.14090788616790 | 3.21450504577937  |
| H | 2.76600010330331 | 2.07164885680700  | 6.42325415007264  |
| H | 2.67453679705884 | 0.63677388042881  | 2.14988881105899  |
| H | 1.33120351716719 | 1.42951584240944  | 6.87366818720667  |
| H | 3.20028115702567 | 0.38066933926786  | 3.66087016074987  |
| N | 1.67044081100422 | 5.67197590761578  | 1.06555972226513  |
| N | 2.12575838943609 | 3.86193669460057  | 3.56888254740850  |
| H | 2.58841951895010 | 6.08019906559615  | 0.91709936110688  |
| H | 1.73077201565629 | 4.44747950536041  | 2.83195581792293  |



|   |                  |                   |                   |
|---|------------------|-------------------|-------------------|
| H | 1.62795747145310 | 4.80154091422391  | 0.53496282771280  |
| H | 2.06588020827186 | 2.88623735565742  | 3.28544601207734  |
| H | 0.98979700470599 | 6.30436699091179  | 0.66606329818075  |
| H | 1.54768565642602 | 3.94643543303359  | 4.39590413087195  |
| N | 2.86282147159951 | 5.01161550953076  | 7.24525244987723  |
| N | 3.52000633913336 | 6.64504344134738  | 4.43361409166870  |
| H | 2.92467584034787 | 5.69126685673621  | 6.49180680821340  |
| H | 4.37621844023441 | 6.83575290411669  | 3.92251255725815  |
| H | 2.18340777023007 | 4.30753165893403  | 6.97195521440024  |
| H | 3.18908490312032 | 5.74547423293411  | 4.08987978285422  |
| H | 2.49972662427377 | 5.48772058132901  | 8.05986899988984  |
| H | 2.83969613739628 | 7.33062208238195  | 4.13125534337907  |
| N | 5.86861904702392 | 1.20958805333523  | 2.29468952385731  |
| N | 4.73858094136067 | 4.02688112705324  | 1.66711054162408  |
| H | 6.82827192124537 | 0.92900472259766  | 2.14613004332826  |
| H | 3.97178739624013 | 3.98624309980843  | 2.33452383906535  |
| H | 5.84321812143530 | 2.22628748448897  | 2.34956662760781  |
| H | 4.69420608948975 | 4.95823764807701  | 1.26240650691839  |
| H | 5.56438618472300 | 0.82912933724239  | 3.18946232172494  |
| H | 4.49750100480993 | 3.37936815087319  | 0.92515797527368  |
| N | 4.94546209797158 | 0.25793604885143  | 5.20722076737003  |
| N | 4.75390695566563 | 3.28246829798107  | 5.46733967006246  |
| H | 5.83963217544052 | -0.10134376244815 | 5.51749525295701  |
| H | 4.42179752666296 | 3.82171346712086  | 6.26477393502855  |
| H | 4.91544681126251 | 1.25805509607829  | 5.44319007131059  |
| H | 5.64849833458913 | 3.67981304085752  | 5.20843238174720  |
| H | 4.24449785391487 | -0.20810977210982 | 5.76984248159591  |
| H | 4.10723524717889 | 3.50169395502475  | 4.71205307333914  |
| N | 4.75060871993053 | 7.23583105045081  | 0.98670185837181  |
| N | 6.59402374437696 | 6.09313044302496  | 3.28200695459874  |
| H | 4.15559002405187 | 0.27422162856023  | -0.25687142332003 |
| H | 6.28059793265177 | 5.19243878850134  | 2.92883657508693  |
| H | 4.20458156604174 | 8.05996510526651  | 1.20292589651301  |
| H | 7.55782477526653 | 6.20733065849511  | 2.99649441233038  |
| H | 5.39640252570231 | 7.08677670506081  | 1.76423193223340  |
| H | 6.58483223775362 | 6.06196389249056  | 4.30152348000088  |
| N | 6.02470817183756 | 6.40339383160006  | 6.39122133655224  |
| H | 6.39912731954710 | 7.26910662940076  | 6.75766865460075  |
| H | 5.09138796094753 | 6.60019393810860  | 6.03554407513637  |
| H | 5.90149323203060 | 5.77970917498100  | 7.17875557725174  |
| H | 5.30445740082812 | 7.46181917285606  | 0.17037667811398  |
| O | 3.94224503349237 | 0.94367901881786  | 0.39239055239574  |
| H | 4.70256697512953 | 0.95224820339918  | 1.04062373342284  |

### **15mer+H2O e- (no e- conformer)**

59

Coordinates from ORCA-job OPT

|   |                  |                  |                   |
|---|------------------|------------------|-------------------|
| N | 1.10424033372230 | 0.70088926003660 | 0.19446214398550  |
| H | 2.07114763582563 | 0.44130026278686 | 0.00816825541912  |
| H | 0.84704704264392 | 1.38764203406824 | -0.50307635933584 |
| H | 1.11775013516530 | 1.18710213765390 | 1.08408513844277  |
| N | 0.35828668819385 | 2.03323470059583 | 5.75168110597371  |
| N | 2.72185857326387 | 1.35369108553782 | 3.06615063506738  |
| H | 0.67867086756374 | 1.78999623031471 | 4.82093887818504  |
| H | 3.29294784909223 | 1.72343484063085 | 3.82573607638221  |
| H | 0.68614939911362 | 2.98217525748809 | 5.91984736047297  |
| H | 2.49797035455972 | 0.39405206733099 | 3.29683329294331  |
| H | 0.86794246253064 | 1.43613602449986 | 6.39164664080225  |
| H | 3.30543889618496 | 1.31790713031851 | 2.23784650432976  |
| N | 1.88308641741269 | 7.37101239158035 | 1.95943308453013  |

|   |                  |                   |                  |
|---|------------------|-------------------|------------------|
| N | 1.34603646720302 | 4.19463319071937  | 3.03317076384124 |
| H | 2.87280688621211 | 7.45646441843509  | 1.74320624899649 |
| H | 0.36461810833204 | 4.21551638471336  | 2.78543567220472 |
| H | 1.73179883236455 | 7.87657995628131  | 2.82360944761548 |
| H | 1.64131652998748 | 3.21816814233738  | 2.98721599721045 |
| H | 1.72264048402600 | 6.39003360080954  | 2.17386081131728 |
| H | 1.40357495211989 | 4.46394312919258  | 4.01099702857989 |
| N | 1.58112244331037 | 5.06502436415754  | 6.36917822128488 |
| N | 3.78713516625906 | 6.69095694630694  | 4.98426239688844 |
| H | 2.25619911110622 | 5.70251281750940  | 5.93032409395178 |
| H | 4.62585488987101 | 6.22124141690206  | 5.32315678533718 |
| H | 0.73695531977159 | 5.59573537163301  | 6.55055031567892 |
| H | 3.75032905716636 | 6.56211829860552  | 3.97891526657488 |
| H | 1.97214591326025 | 4.82649404976805  | 7.27489650040746 |
| H | 3.92968938977284 | 7.68093548300267  | 5.14609791072479 |
| N | 5.67429594516554 | 2.04585187454236  | 1.00390822642243 |
| N | 3.83398490650362 | 4.56266332063089  | 1.02176517707527 |
| H | 6.47165819429707 | 2.24857430225526  | 0.41461430590987 |
| H | 3.04583726936480 | 4.48244914716323  | 1.66410843775831 |
| H | 5.10649900212641 | 2.89802298362910  | 1.04506160246059 |
| H | 4.20468736529955 | 5.50140738387022  | 1.13885628938832 |
| H | 6.03271180796855 | 1.85245046801925  | 1.94265769414991 |
| H | 3.43897002297807 | 4.52347938070782  | 0.09001839358639 |
| N | 6.52829751901477 | 1.49121660423804  | 3.96743702644486 |
| N | 4.05046344547069 | 2.85887196026467  | 5.56933328677867 |
| H | 7.25405418463175 | 2.08103149892302  | 4.36609957363230 |
| H | 4.27215965148024 | 2.39675585363388  | 6.44692954353224 |
| H | 5.65962792227828 | 1.78999851970043  | 4.40929150736004 |
| H | 4.66225700008285 | 3.67083625377585  | 5.54153700829710 |
| H | 6.71195059465384 | 0.55227922256686  | 4.30338996569794 |
| H | 3.10838659308459 | 3.22711267213382  | 5.67314143459852 |
| N | 5.28567302067531 | 7.51638862594305  | 1.71625474039748 |
| N | 6.63269066764987 | 5.15354869879057  | 3.11993657693008 |
| H | 4.41999422088609 | -0.79631076022123 | 0.48910933020991 |
| H | 6.03588036713357 | 4.42905757023922  | 2.73340085794439 |
| H | 5.27884796643453 | 8.33254588619059  | 2.31601928154878 |
| H | 7.58473684535128 | 4.81705094635976  | 3.02867118022205 |
| H | 5.86400098716166 | 6.80901692257485  | 2.18554963948462 |
| H | 6.44515543492631 | 5.18877205904543  | 4.11974047651022 |
| N | 6.33130289897162 | 5.24273857531379  | 6.46284626400467 |
| H | 6.93234684425788 | 6.05620268433828  | 6.60043338425216 |
| H | 5.77620384968099 | 5.15795488600741  | 7.31713852538268 |
| H | 6.95872046065810 | 4.43438726878186  | 6.47072320118872 |
| H | 5.76749951180086 | 7.78631963420521  | 0.86745109744915 |
| O | 4.15683260891604 | -0.01571371432619 | 0.00234023010407 |
| H | 4.73604975532881 | 0.71665592916086  | 0.35389557706981 |

### **15mer+H2O Neutral (e- conformer)**

59

Coordinates from ORCA-job OPT

|   |                   |                  |                  |
|---|-------------------|------------------|------------------|
| N | 0.47027281886211  | 1.85399580660245 | 2.19858089010570 |
| H | 0.19159805038205  | 0.97647228399872 | 1.77970936218496 |
| H | 0.46017732775028  | 2.54921178747766 | 1.46291567935927 |
| H | 1.44126408003866  | 1.76147400755407 | 2.50087559516566 |
| N | -0.65723222897658 | 3.21440676032312 | 4.76177819957956 |
| N | 3.50162589386293  | 1.65966913114515 | 3.21370679143858 |
| H | -0.40984310236092 | 2.67548181907428 | 3.92756761428826 |
| H | 3.78859470724880  | 1.91639871832957 | 4.15975864087762 |
| H | -0.81450628455000 | 2.54926729064394 | 5.50863244305177 |
| H | 3.50944657338677  | 0.64765216123175 | 3.17820646840524 |

|   |                   |                  |                   |
|---|-------------------|------------------|-------------------|
| H | -1.54774829849598 | 3.66028264953196 | 4.58195967766673  |
| H | 4.23822984124146  | 1.97126825508514 | 2.58899435650628  |
| N | 1.51098923196451  | 7.23562732583424 | 1.68198521950318  |
| N | 2.00877024543873  | 4.61816428862163 | 3.18134622543329  |
| H | 1.96584018665561  | 7.24520667710526 | 0.77791836094878  |
| H | 1.12808647564882  | 4.45089019112085 | 3.65866474468973  |
| H | 1.60733048578857  | 6.28708268404208 | 2.06168551124673  |
| H | 2.42565242614743  | 3.69657580649708 | 3.08170305522718  |
| H | 0.52726882498474  | 7.41087673954455 | 1.52530549320514  |
| H | 2.59990278040532  | 5.11646528563575 | 3.84647465555179  |
| N | 1.92446204708087  | 4.20011411949745 | 6.53927413042389  |
| N | 4.03692895736833  | 6.26585403720542 | 5.00566235086787  |
| H | 2.43677035066187  | 4.94060045067631 | 6.06710896327426  |
| H | 4.34034515269436  | 6.44702383484397 | 5.95326150923155  |
| H | 1.09503531356434  | 4.00477283870160 | 5.98320040334252  |
| H | 4.83756713384575  | 5.88523847715555 | 4.50746330581023  |
| H | 1.61385108030420  | 4.56525645510221 | 7.42994170284287  |
| H | 3.79521898317633  | 7.16046426227367 | 4.58710796826156  |
| N | 6.19203645893379  | 2.32581314688979 | 0.82660931486833  |
| N | 4.31342847777953  | 5.05293336387367 | 0.92232130000871  |
| H | 5.62818230945256  | 1.54514053436349 | 0.51918041704345  |
| H | 3.41858415061976  | 4.94758306076374 | 1.39019251318636  |
| H | 5.60347584213515  | 3.15443162934175 | 0.85872602071394  |
| H | 4.63342993684419  | 6.01206777485290 | 1.07085475391628  |
| H | 6.51034324545772  | 2.13612825212341 | 1.76998492849100  |
| H | 4.16145083487593  | 4.92861793412680 | -0.06985064963982 |
| N | 6.82157455648595  | 1.68456524867506 | 4.20364843904395  |
| N | 4.49188356269194  | 2.44627912025871 | 6.20829175373091  |
| H | 7.63780438361801  | 1.71060862455135 | 4.80160155222861  |
| H | 4.54941526474442  | 1.72716696380767 | 6.91904091242325  |
| H | 6.00560211030299  | 1.82263737188473 | 4.80168772743838  |
| H | 5.20771394224065  | 3.13702286470731 | 6.43498058039074  |
| H | 6.76665343527406  | 0.74397647215412 | 3.83436223560267  |
| H | 3.59007891609432  | 2.91195036047422 | 6.34314009753471  |
| N | 5.51506615483135  | 7.77305991188976 | 1.90759622643442  |
| N | 6.52089413728177  | 4.75819438218577 | 3.27367576872772  |
| H | 2.41547317507988  | 8.27770459827309 | 2.78316081645703  |
| H | 5.83719537615225  | 4.78857642834806 | 2.51861311593190  |
| H | 4.79751184107838  | 8.32649821557107 | 2.36975261400711  |
| H | 7.39201695337736  | 5.07059618432027 | 2.86111003516555  |
| H | 6.07412279970814  | 7.34847773173912 | 2.63772016157344  |
| H | 6.65474170644392  | 3.76971865283411 | 3.48590191131507  |
| N | 6.86684600295498  | 4.64116401852142 | 6.43317899816081  |
| H | 6.75015444904489  | 4.88663787367366 | 5.45054903740364  |
| H | 6.74527355959369  | 5.48695564683032 | 6.97504735610558  |
| H | 7.83035628345811  | 4.35858652210742 | 6.55929623082473  |
| H | 6.11764056403841  | 8.40810745545114 | 1.40138270513090  |
| O | 3.04521450622176  | 8.75732309334980 | 3.38436366215893  |
| H | 2.59080391565776  | 9.54614286342530 | 3.67726408315727  |

### **15mer+H2O e- (e- conformer)**

59

Coordinates from ORCA-job OPT

|   |                  |                  |                   |
|---|------------------|------------------|-------------------|
| N | 1.37989734582129 | 1.77345426790521 | 0.44901608904192  |
| H | 2.12373262399559 | 1.67523907706575 | -0.23107665598395 |
| H | 1.23907480496456 | 2.76985980483162 | 0.57922755830871  |
| H | 1.75581040313419 | 1.45317077858325 | 1.33569996994308  |
| N | 0.34823974792913 | 2.02495941418690 | 5.65571715008041  |
| N | 2.98518060503743 | 1.49668527096612 | 3.51297491983792  |
| H | 0.85449487416819 | 1.80885179206854 | 4.80395766295894  |

|   |                  |                  |                   |
|---|------------------|------------------|-------------------|
| H | 3.33742506382659 | 1.93146103081581 | 4.36652259320425  |
| H | 0.84584365873241 | 2.79727423316263 | 6.09301415000414  |
| H | 2.97124181378266 | 0.49947831228360 | 3.68966086698562  |
| H | 0.44956636074789 | 1.22405659147069 | 6.26594759578068  |
| H | 3.70742828349699 | 1.64824329394659 | 2.81523723403768  |
| N | 1.85620226626086 | 7.75525909280040 | 1.64704872190695  |
| N | 1.31390278234287 | 4.17327069265655 | 2.72086132768325  |
| H | 2.87045817720017 | 7.69795905959291 | 1.58971865756419  |
| H | 0.31342135073430 | 4.16147142263683 | 2.87292706824530  |
| H | 1.65548715497231 | 8.12466213699161 | 2.56888882135937  |
| H | 1.65874296660085 | 3.25017746288821 | 2.97579485257298  |
| H | 1.51808520535430 | 6.79946040201461 | 1.64666327030983  |
| H | 1.71766244373107 | 4.81459918865622 | 3.40032037425230  |
| N | 1.61932633903920 | 4.86727355715971 | 6.59742564631789  |
| N | 3.42008028638963 | 5.92826486273480 | 4.31160561464229  |
| H | 2.04640602882618 | 5.26406485909459 | 5.75636922464229  |
| H | 4.20999187360363 | 5.43083260335562 | 4.70968614497709  |
| H | 0.62993561687153 | 5.08084603014035 | 6.55442086875741  |
| H | 3.59822147823583 | 5.97240197538077 | 3.31466962961666  |
| H | 1.99307311775851 | 5.39635907190639 | 7.37752951118817  |
| H | 3.52629592106570 | 6.89031009726219 | 4.62942554953659  |
| N | 5.62075918911965 | 1.81352912681731 | 1.04090612881109  |
| N | 3.90682659828859 | 4.68360553254425 | 0.88656972120208  |
| H | 5.00861159796340 | 1.06348195958905 | 0.74878850201683  |
| H | 2.98681710822797 | 4.53875348252976 | 1.30063605421808  |
| H | 5.08574239083132 | 2.67831041753137 | 1.02231447792709  |
| H | 4.14785611577588 | 5.66437934858260 | 1.02020123288426  |
| H | 5.89821585615055 | 1.63290480365479 | 2.00339783220444  |
| H | 3.80545329576848 | 4.54637156129036 | -0.11105617100437 |
| N | 6.46388277776522 | 1.54695493857420 | 4.19814051386715  |
| N | 4.22626063082036 | 2.94029463301472 | 6.15156462371492  |
| H | 7.17604949194006 | 2.26617686804065 | 4.22999045008334  |
| H | 4.43962792394962 | 2.41952820103968 | 6.99391000237376  |
| H | 5.66830893007791 | 1.90537021141660 | 4.72291722066592  |
| H | 4.90219974171742 | 3.70233049318277 | 6.10606581085547  |
| H | 6.82575812337714 | 0.75242675823885 | 4.71011020912314  |
| H | 3.31730291262084 | 3.37338296823958 | 6.30809828951115  |
| N | 5.15595804217512 | 7.57620716656923 | 1.89889769535963  |
| N | 6.60766222953096 | 4.87509130836440 | 2.66497085088122  |
| H | 4.08473085652293 | 9.60749836864350 | 5.00765307825345  |
| H | 5.76998840985118 | 4.55194065934081 | 2.18638691960369  |
| H | 4.99286561267496 | 8.09793099692026 | 2.75762868119007  |
| H | 7.35668429769542 | 4.25462000203496 | 2.38667617753111  |
| H | 5.87757091163528 | 6.88815935269684 | 2.11290960923405  |
| H | 6.45783428914528 | 4.75080815376899 | 3.65981662758901  |
| N | 6.30368235871489 | 5.52769056379706 | 6.06432920443975  |
| H | 6.65252043201806 | 6.23421537807379 | 5.41858349866607  |
| H | 5.75808984737345 | 6.06049006349162 | 6.74324722465146  |
| H | 7.11951428340180 | 5.19705916637212 | 6.57335012255038  |
| H | 5.55025660865829 | 8.22619806278863 | 1.23069571984729  |
| O | 4.45963433185201 | 8.74467854228073 | 4.78713694231646  |
| H | 5.13897411632848 | 8.62012497424041 | 5.47008226968920  |

**15mer+CH3OH neutral (no e- conformer)**

62

Coordinates from ORCA-job OPT

|   |                  |                  |                   |
|---|------------------|------------------|-------------------|
| N | 1.58730827662416 | 2.93720465528541 | -0.48208094598200 |
| H | 2.31818356038533 | 2.31192793910681 | -0.14759974436809 |
| H | 0.70110418613281 | 2.54213603585232 | -0.19479242351780 |
| H | 1.60609344926665 | 2.91160913611634 | -1.49316539099242 |

|   |                  |                   |                   |
|---|------------------|-------------------|-------------------|
| N | 1.85307277465668 | 2.01690488111596  | 6.25558696391445  |
| N | 2.38358021897445 | 0.55679985566427  | 3.28982393592352  |
| H | 1.83000344424355 | 1.62339343835675  | 5.31830081452180  |
| H | 1.75262223765219 | -0.23088123028693 | 3.36494508537554  |
| H | 2.82093635942722 | 1.98801283603797  | 6.55265758968090  |
| H | 2.60515766943114 | 0.66378687106811  | 2.30246180260325  |
| H | 1.32958892916248 | 1.39949159174387  | 6.86186983585839  |
| H | 3.25327341050780 | 0.28676477472407  | 3.74185766470571  |
| N | 1.64798386012978 | 5.69624743030980  | 1.10588735701252  |
| N | 2.12666109688104 | 3.83522387467868  | 3.56945650676468  |
| H | 2.54079168822173 | 6.17145130701924  | 1.01254918985916  |
| H | 1.71952135448459 | 4.41249308361654  | 2.83204069066102  |
| H | 1.66350398496071 | 4.89128994680564  | 0.47837500357183  |
| H | 2.05425947682466 | 2.85720747283809  | 3.30157351853141  |
| H | 0.93371850221102 | 6.32810897050883  | 0.76869593637542  |
| H | 1.56229583664259 | 3.92944109219993  | 4.40500303525862  |
| N | 2.93345162163196 | 4.94157158920125  | 7.26018457030347  |
| N | 3.47810996235589 | 6.63162064164932  | 4.46290039255436  |
| H | 2.96260072063857 | 5.63731025388080  | 6.51967341956280  |
| H | 4.32299025550003 | 6.84843410240506  | 3.94397916987359  |
| H | 2.27070611788318 | 4.22277998633497  | 6.98235928064892  |
| H | 3.16990730249103 | 5.72394690468001  | 4.11944484476381  |
| H | 2.56898086368232 | 5.39088603735685  | 8.08932195445474  |
| H | 2.77532886604220 | 7.29805305964048  | 4.16936718124131  |
| N | 5.77673471928626 | 1.25923471244093  | 2.22847856391427  |
| N | 4.71868064473472 | 4.11770656948382  | 1.66459324069242  |
| H | 6.70788701626600 | 0.95641905044621  | 1.97769997354121  |
| H | 3.95206912995788 | 4.04567628780971  | 2.33040013410293  |
| H | 5.78683350967927 | 2.27458250868223  | 2.30512792793437  |
| H | 4.67282395554684 | 5.06711254170854  | 1.30430858285440  |
| H | 5.55285370273953 | 0.86568607340202  | 3.14136162852328  |
| H | 4.47034026971799 | 3.50901346242844  | 0.89310200892185  |
| N | 5.08559936416865 | 0.26171885357256  | 5.18279589011895  |
| N | 4.82276516968822 | 3.27553748657736  | 5.39756086089053  |
| H | 6.00262869396394 | -0.06326086755601 | 5.46251165933441  |
| H | 4.49284980431292 | 3.78602711433565  | 6.21414451791260  |
| H | 5.03350031772162 | 1.26591572595447  | 5.40002050120335  |
| H | 5.68490444554428 | 3.72353730816709  | 5.11274393146503  |
| H | 4.42314286861862 | -0.21412029736993 | 5.78266889573698  |
| H | 4.13775714868615 | 3.46986192214033  | 4.66992945133921  |
| N | 4.71137211697604 | 7.35975465640337  | 1.08622641937323  |
| N | 6.58396999610652 | 6.15968083803354  | 3.31702669108669  |
| C | 3.85420925338734 | -0.15085584337873 | -0.33014442492439 |
| H | 6.27729785534249 | 5.26095806740199  | 2.95385928501702  |
| H | 4.18159044676172 | 8.18521182135320  | 1.33547378041717  |
| H | 7.55132196638342 | 6.27750507948013  | 3.04535372727085  |
| H | 5.37973781436954 | 7.18852362182187  | 1.84023098137937  |
| H | 6.56095318215409 | 6.12274153909668  | 4.33641863885206  |
| N | 5.98726072032390 | 6.43236615276977  | 6.41949468355151  |
| H | 6.35730306856557 | 7.28138894115521  | 6.82692973278004  |
| H | 5.05989316253934 | 6.64380920823900  | 6.05722047922136  |
| H | 5.84710500611542 | 5.77730536198990  | 7.17840443115252  |
| H | 5.24184756275049 | 7.59733087355063  | 0.25770714768742  |
| O | 3.71959116037907 | 0.97960861342635  | 0.49031018277434  |
| H | 3.89693709288631 | -1.07979180225099 | 0.25186281254274  |
| H | 4.75136594587141 | -0.09992604414806 | -0.95881414674237 |
| H | 2.98531922091657 | -0.20648060064281 | -0.98901143378421 |
| H | 4.51228710494136 | 1.03280684749197  | 1.09688149763287  |

**15mer+CH3OH + e- (no e- conformer)**

62

Coordinates from ORCA-job OPT

|   |                  |                   |                   |
|---|------------------|-------------------|-------------------|
| N | 0.90085090286907 | 0.34504010574439  | 0.28130408042800  |
| H | 1.90253340747916 | 0.32479570956949  | 0.10180752642786  |
| H | 0.48883877521304 | 0.94674418914487  | -0.42040989965513 |
| H | 0.79790754492301 | 0.82596715239554  | 1.16778364502851  |
| N | 0.33459198574848 | 2.01086799714973  | 5.62097018666276  |
| N | 2.59058847607376 | 1.15613311333746  | 3.08881255761420  |
| H | 0.71693603750910 | 1.73797811529023  | 4.72157675735354  |
| H | 3.25013634903895 | 1.58374015385255  | 3.73699191406381  |
| H | 0.66659436033120 | 2.95827887006645  | 5.78730250345307  |
| H | 2.36711474540042 | 0.24075324392803  | 3.45867420765955  |
| H | 0.78675627843258 | 1.42422518030172  | 6.31182037331438  |
| H | 3.07329407974013 | 0.99707543783528  | 2.20852163907977  |
| N | 1.93099703484729 | 7.40298579324758  | 1.96253286817131  |
| N | 1.43967930970096 | 4.13172439922511  | 2.93906631012671  |
| H | 2.92542221700884 | 7.54202107452509  | 1.80080858825942  |
| H | 0.47197086327760 | 4.21835179277905  | 2.65406874475097  |
| H | 1.71636608997205 | 7.85932740378415  | 2.84069115378109  |
| H | 1.66281821439344 | 3.13627296297441  | 2.91296695584282  |
| H | 1.80860405011461 | 6.40755894166861  | 2.12626238898227  |
| H | 1.47764288039080 | 4.40672496589713  | 3.91680395380650  |
| N | 1.60505975254594 | 5.02655147418150  | 6.24854106611299  |
| N | 3.81567503863069 | 6.76320424678594  | 5.00514418346210  |
| H | 2.27449395290614 | 5.69271046048238  | 5.84537099224151  |
| H | 4.64097577682583 | 6.26535209537326  | 5.33681807876563  |
| H | 0.75762486279439 | 5.54066313674552  | 6.46020293271572  |
| H | 3.82221118301919 | 6.72069231085931  | 3.99180221121395  |
| H | 2.00029419776794 | 4.74313154716513  | 7.13962810927413  |
| H | 3.94846822881235 | 7.73530713730314  | 5.25826589502461  |
| N | 5.77235675731735 | 2.13281280440717  | 0.93986458010721  |
| N | 3.96569815315015 | 4.65884627921061  | 1.04844557074952  |
| H | 6.56283943359176 | 2.30779402703965  | 0.33361214604433  |
| H | 3.17038626738861 | 4.50676488606802  | 1.67082956478759  |
| H | 5.23431302001289 | 3.00259878076940  | 1.00378886529730  |
| H | 4.29254704387910 | 5.60438201383297  | 1.22310523796244  |
| H | 6.13848202133905 | 1.91511505145098  | 1.87084167473416  |
| H | 3.58711757234573 | 4.65750414291976  | 0.10901352521819  |
| N | 6.56403827646390 | 1.47000361671845  | 3.87598105893646  |
| N | 4.07181165892094 | 2.82073511382728  | 5.42742734491045  |
| H | 7.27384345193447 | 2.03786418560122  | 4.33103202505129  |
| H | 4.28814886566567 | 2.37112619208364  | 6.31298720942187  |
| H | 5.67727483024524 | 1.75942919069182  | 4.28800615212075  |
| H | 4.67165368750557 | 3.64129069727972  | 5.40073051639954  |
| H | 6.72566136473506 | 0.51708491044910  | 4.18239680079250  |
| H | 3.12372012822126 | 3.17691450489144  | 5.51627532282581  |
| N | 5.32213266209286 | 7.67103345111268  | 1.85463744553354  |
| N | 6.66325338923601 | 5.23936227255987  | 3.13236662384006  |
| C | 4.52860968513910 | -1.01984768480756 | 0.75902246246718  |
| H | 6.05019074254984 | 4.55084771962691  | 2.70697399774482  |
| H | 5.33999621296081 | 8.46447693090536  | 2.48401787896278  |
| H | 7.60663172410960 | 4.88145366009772  | 3.03420911391708  |
| H | 5.91124294013981 | 6.94410899394694  | 2.27879542955677  |
| H | 6.46664399762096 | 5.23592181547745  | 4.13129195511842  |
| N | 6.31522529715378 | 5.21210575065376  | 6.45793250318903  |
| H | 6.91116828954754 | 6.01612602305614  | 6.65856335333942  |
| H | 5.72625361237700 | 5.08835185909943  | 7.28441228882009  |
| H | 6.94066333989033 | 4.40219463555370  | 6.45317935592253  |

|   |                  |                   |                  |
|---|------------------|-------------------|------------------|
| H | 5.77660148410375 | 7.96960777126711  | 1.00030231098237 |
| O | 3.99568046075181 | 0.19804449423079  | 0.32449976523195 |
| H | 4.94821854059017 | -0.95136356286956 | 1.77185138620574 |
| H | 5.32034370841554 | -1.39003285892412 | 0.09223203511781 |
| H | 3.72922223618648 | -1.76487552807714 | 0.77537687385365 |
| H | 4.67995197595415 | 0.91461560363669  | 0.47817608122310 |

### **15mer+CH3OH neutral (e- conformer)**

62

Coordinates from ORCA-job OPT

|   |                   |                  |                   |
|---|-------------------|------------------|-------------------|
| N | 1.52438689108474  | 1.40278359431778 | 1.39394219956180  |
| H | 0.99311621606701  | 0.74683021534030 | 0.83726749222084  |
| H | 2.47050552148878  | 1.43916811957998 | 1.01080767060017  |
| H | 1.61053009822501  | 1.01192249273780 | 2.32441161273064  |
| N | 0.33400312933890  | 2.32353380429711 | 4.86627958120180  |
| N | 3.30247450405167  | 2.11621475634107 | 3.99726910457372  |
| H | 1.28828704083748  | 2.08499172667246 | 4.58580987704805  |
| H | 3.74706195542165  | 2.48477321508512 | 4.83832952891798  |
| H | 0.11230369104749  | 1.77176773968593 | 5.68461125003280  |
| H | 3.90663880309058  | 1.39565344710039 | 3.62467588379779  |
| H | -0.28782435086975 | 2.01660945418931 | 4.12974597781629  |
| H | 3.29715155361108  | 2.86098904869444 | 3.31056012837316  |
| N | 2.10720687037931  | 7.81431606303799 | 1.41349957445490  |
| N | 0.92984444422570  | 4.30626677557291 | 2.29656034058877  |
| H | 3.08702342278111  | 7.80161390977329 | 1.67970668408947  |
| H | 1.01898786670020  | 3.37357196699793 | 1.88204205044159  |
| H | 1.66028136660870  | 8.53496728343077 | 1.96556736373821  |
| H | 0.55599062744311  | 4.16150299193767 | 3.22905191737246  |
| H | 1.72121498977648  | 6.93070125034019 | 1.72442423623846  |
| H | 0.21849247249528  | 4.79888632710526 | 1.77117733069130  |
| N | 1.59162887065627  | 4.72480071726339 | 6.62024278398161  |
| N | 3.21576884812465  | 5.78284906449799 | 4.17131679337926  |
| H | 1.92709682666586  | 5.44248216739856 | 5.98224817676580  |
| H | 3.85208528521414  | 5.09779867881294 | 4.55995345185902  |
| H | 0.99138532832124  | 4.10619910483904 | 6.07895363710957  |
| H | 2.54085119314977  | 5.28639176254793 | 3.59639390372689  |
| H | 1.01905243710765  | 5.17405870225859 | 7.32244426975600  |
| H | 3.76125381765830  | 6.35616568947772 | 3.53751610301588  |
| N | 4.47669419207966  | 1.87672363012451 | 0.37453501788012  |
| N | 3.79535205135646  | 4.89624594229250 | 0.83019236347309  |
| H | 5.32786305814454  | 1.58308445868432 | 0.83658784630569  |
| H | 2.91589945568156  | 4.73203979087779 | 1.31768968289156  |
| H | 4.39860010509033  | 2.88786212011054 | 0.50100615639998  |
| H | 4.19631847764696  | 5.73178360832968 | 1.24814389105984  |
| H | 4.61076613822415  | 1.70536989229028 | -0.61372124594834 |
| H | 3.54556161204959  | 5.15440690818831 | -0.11677780076291 |
| N | 6.80916175739153  | 2.25827690442553 | 4.86190000589245  |
| N | 4.49288167058854  | 3.53530375470218 | 6.64386364914126  |
| H | 7.61739184575667  | 2.49603346431419 | 5.42337728338876  |
| H | 4.77854894800700  | 3.09417566329383 | 7.50940575258328  |
| H | 5.98711430602141  | 2.56700335976904 | 5.38179736282941  |
| H | 5.10002539512942  | 4.34482553771899 | 6.50174555862588  |
| H | 6.77645484858461  | 1.24780271440656 | 4.81560310456935  |
| H | 3.54167742614885  | 3.88407338238606 | 6.79311427760077  |
| N | 5.43728108382803  | 7.37302766238906 | 2.32324803110982  |
| N | 6.61027001357305  | 4.38312791134529 | 2.55869592895261  |
| C | 3.88663079080971  | 8.84392368676028 | 5.67985374470562  |
| H | 5.78175269674380  | 4.25562602639741 | 1.98513568103134  |
| H | 5.47855843049289  | 7.95632694626859 | 3.15374931566563  |
| H | 7.40790502769639  | 4.31456794434435 | 1.93964988217634  |

|   |                  |                  |                  |
|---|------------------|------------------|------------------|
| H | 6.02083232162599 | 6.55533239945700 | 2.49672249946983 |
| H | 6.66762136511780 | 3.59467310807440 | 3.20674639925540 |
| N | 6.45698518853673 | 5.79026519147234 | 5.54393838140099 |
| H | 6.57750024220050 | 5.46907783075990 | 4.58576959936306 |
| H | 6.09491781257044 | 6.73723586916203 | 5.50298570281158 |
| H | 7.38029412016890 | 5.84892923808087 | 5.95331416217676 |
| H | 5.86142593320667 | 7.89463365804249 | 1.56704157803449 |
| O | 5.21124877112976 | 8.76636883632171 | 5.16970598912764 |
| H | 5.69395057150703 | 9.55270997923418 | 5.42500688537061 |
| H | 3.38941620867774 | 7.91498521035644 | 5.40462503351817 |
| H | 3.88302893295700 | 8.94074402009211 | 6.76896852696035 |
| H | 3.33881690567526 | 9.68443664553116 | 5.24384025960562 |

### **15mer+CH3OH + e- (e- conformer)**

62

Coordinates from ORCA-job OPT

|   |                  |                  |                   |
|---|------------------|------------------|-------------------|
| N | 1.39467227586538 | 1.82604453200004 | 0.39851026723835  |
| H | 2.16134751171085 | 1.74485651861354 | -0.25785253837659 |
| H | 1.26231728861682 | 2.81835806981604 | 0.56291317232076  |
| H | 1.73594735441727 | 1.46765827225335 | 1.28443341795620  |
| N | 0.34534236838738 | 2.10289238823073 | 5.72900570583964  |
| N | 2.92801049460220 | 1.43140054149237 | 3.49951637670407  |
| H | 0.83569446833542 | 1.87523614074910 | 4.87106091743477  |
| H | 3.28582294107911 | 1.82877236177402 | 4.36954207336555  |
| H | 0.83263892380939 | 2.90199339822420 | 6.12978819131528  |
| H | 2.85774116595932 | 0.43245747123187 | 3.65035638814054  |
| H | 0.49201091217671 | 1.32491023632222 | 6.35974536992785  |
| H | 3.66999872131280 | 1.56244751859483 | 2.81863123743475  |
| N | 1.91195904577122 | 7.78876877355154 | 1.85667842853982  |
| N | 1.37435064783746 | 4.18058989792764 | 2.74988967349648  |
| H | 2.92276174257863 | 7.73985000927207 | 1.74540602878366  |
| H | 0.37857202714394 | 4.21138495380441 | 2.92796149337568  |
| H | 1.75339250245858 | 7.95220043693319 | 2.84395768355630  |
| H | 1.68491085335796 | 3.24043034329962 | 2.98754799082926  |
| H | 1.56453616732957 | 6.85376846739780 | 1.67501259707437  |
| H | 1.82124488076282 | 4.79754247046296 | 3.42520601724005  |
| N | 1.70952736027027 | 4.91964685421726 | 6.63965686091135  |
| N | 3.55391613221254 | 5.88132224474520 | 4.33351855553463  |
| H | 2.13898369404107 | 5.28804678431416 | 5.78770868333127  |
| H | 4.32691123909340 | 5.42647612532520 | 4.81014804070774  |
| H | 0.75016200845990 | 5.24528972770694 | 6.65334334444706  |
| H | 3.77589127577525 | 5.84016433495618 | 3.34578375875200  |
| H | 2.18106057670098 | 5.38370099572872 | 7.40945838909383  |
| H | 3.63521344654044 | 6.86594894069103 | 4.57789511179880  |
| N | 5.54793819024446 | 1.79968115680176 | 1.01133616584961  |
| N | 3.93028703882608 | 4.72087302941600 | 0.90612813009399  |
| H | 4.90330001435933 | 1.07469468722400 | 0.72558499818159  |
| H | 3.00886137362819 | 4.57593170191105 | 1.31787574843117  |
| H | 5.03925027264439 | 2.68015698617253 | 1.02758055517008  |
| H | 4.17186143949495 | 5.70171371740037 | 1.03195349263318  |
| H | 5.84968831981954 | 1.59297556560104 | 1.96148415627949  |
| H | 3.83851504513115 | 4.57118184480319 | -0.09056674230107 |
| N | 6.42688610290075 | 1.55528597455197 | 4.13544070038194  |
| N | 4.16347731799386 | 2.81468389057991 | 6.14523225082163  |
| H | 7.01033144715831 | 2.38337057133789 | 4.11425253654613  |
| H | 4.37180154314591 | 2.29996862877376 | 6.99268033704370  |
| H | 5.61405554163830 | 1.80057731235789 | 4.69673207351359  |
| H | 4.86055041725527 | 3.55580823944038 | 6.08530392058425  |
| H | 6.94049836593720 | 0.84830265683716 | 4.64598789576195  |
| H | 3.27235683457391 | 3.28051944382281 | 6.30909607731423  |



|   |                  |                   |                  |
|---|------------------|-------------------|------------------|
| N | 5.21671512013903 | 7.64275779150431  | 1.93461317302994 |
| N | 6.67268314764268 | 4.94343496512065  | 2.64926128098856 |
| C | 3.66866839542789 | 10.00794826730286 | 4.80263571041967 |
| H | 5.85219050683529 | 4.55753610718237  | 2.18900485498671 |
| H | 5.08547384159263 | 8.12084960567413  | 2.82318157808347 |
| H | 7.45935839849867 | 4.36241410294494  | 2.39164787047986 |
| H | 5.92583047334460 | 6.92773941344806  | 2.09895634238480 |
| H | 6.53664506196218 | 4.85957559964973  | 3.65075890748007 |
| N | 6.31860062473279 | 5.35708826533392  | 6.13820227563066 |
| H | 6.66742532121380 | 6.17604334308562  | 5.64001440515485 |
| H | 5.77365820535172 | 5.76052069963724  | 6.90317770896937 |
| H | 7.13558949815588 | 4.94036317548413  | 6.57948533944792 |
| H | 5.61169779242724 | 8.31764867978471  | 1.29232379483828 |
| O | 4.40383880856336 | 8.80723865585981  | 4.75258957992130 |
| H | 4.91390688386018 | 8.70443437639247  | 5.57302094593365 |
| H | 3.16437551175529 | 10.11869059348320 | 3.84143928418240 |
| H | 2.91091109438431 | 9.99112184921598  | 5.59421231881992 |
| H | 4.31756764256641 | 10.87637533598065 | 4.96085910675329 |

## VDE Determination of the Solid Bulk Crystal Ammonia

|                          | $(\text{NH}_3)_{n=14}$ | $(\text{NH}_3)_{n=23}$ | $(\text{NH}_3)_{n=38}$ |
|--------------------------|------------------------|------------------------|------------------------|
|                          | <b>14</b>              | <b>23</b>              | <b>38</b>              |
|                          | $n^{-1/3}$             | $n^{-1/3}$             | $n^{-1/3}$             |
|                          | <b>0.41</b>            | <b>0.35</b>            | <b>0.30</b>            |
| <b>VDE (aug-cc-pVDZ)</b> | <b>-1.5</b>            | <b>1.0</b>             | <b>3.3</b>             |
| <b>VDE (aug-cc-pVTZ)</b> | <b>5.8</b>             | <b>8.0</b>             | <b>10.1</b>            |
| <b>VDE (aug-cc-pVQZ)</b> | <b>9.2</b>             | <b>11.4</b>            | -----                  |
| <b>VDE (CBS-2/3)</b>     | <b>7.8</b>             | <b>10.2</b>            | <b>12.4</b>            |
| <b>VDE (CBS-3/4)</b>     | <b>10.0</b>            | <b>12.2</b>            | -----                  |

**Table S1.**  $n^{-1/3}$  and calculated VDE (kcal/mol) values as obtained by different basis sets and CBS at the DLPNO-CCSD(T) level of theory for the three crystalline clusters. Unfortunately the aug-cc-pVQZ value of the  $(\text{NH}_3)_{38}$  cluster was computationally too heavy.

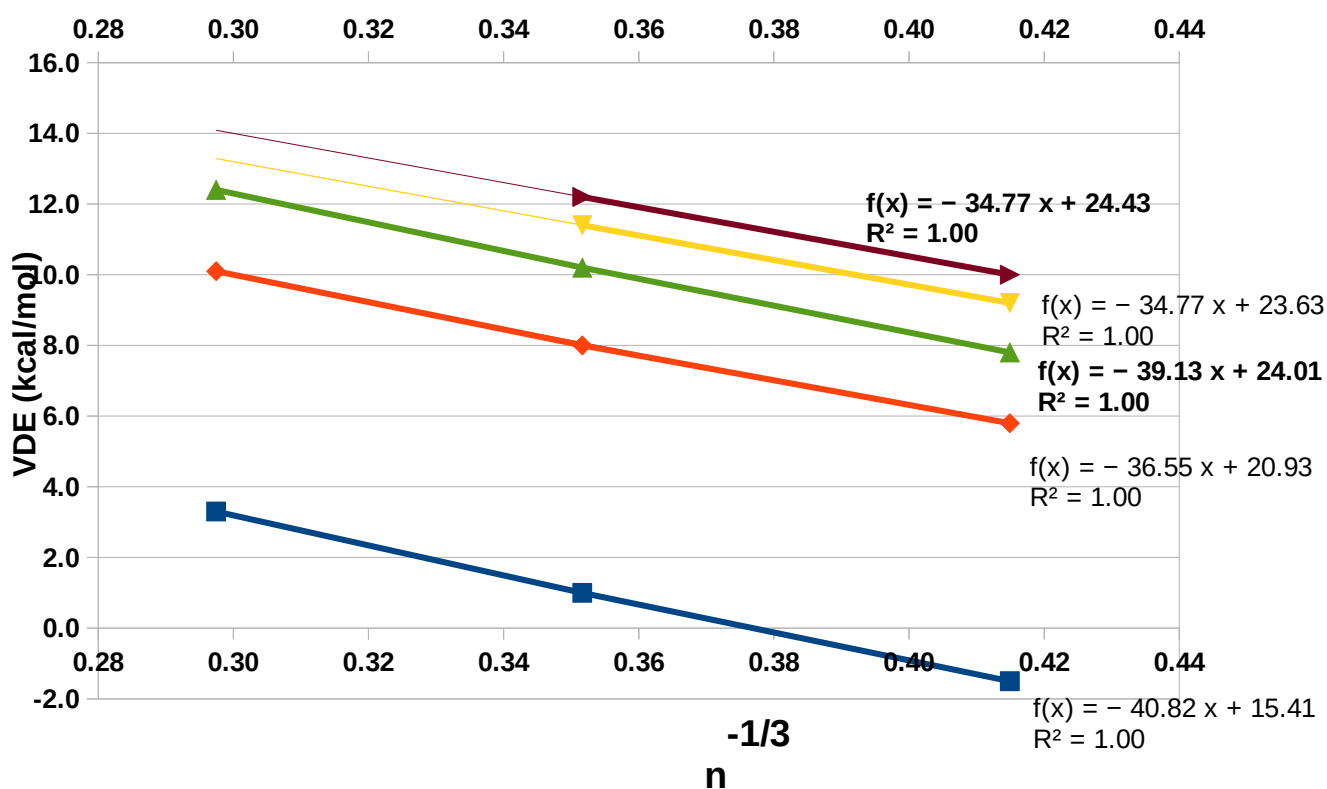

**Figure S2.** VDE Estimation in solid crystalline bulk by linear fitting of the data reported in Tab. S1. Blue line: aug-cc-pVDZ, orange line: aug-cc-pVTZ; green line: CBS aug-cc-pVDZ/aug-cc-pVTZ; yellow line: aug-cc-pVQZ; maroon: CBS aug-cc-pVTZ/aug-cc-pVQZ. The intercept determines the VDE in bulk.

|                                        |     | 14mer neutral | 14mer 1e-     | 23mer neutral  | 23mer 1e-      | 38mer neutral  | 38mer 1e-      |
|----------------------------------------|-----|---------------|---------------|----------------|----------------|----------------|----------------|
| HF                                     | n   |               |               |                |                |                |                |
| aug-cc-pVQZ                            | 4   | -787.15443839 | -787.16810917 | -1293.18693608 | -1293.20417052 |                |                |
| aug-cc-pVTZ                            | 3   | -787.10347721 | -787.11132559 | -1293.10363506 | -1293.11506888 | -2136.42275409 | -2136.43783999 |
| aug-cc-pVDZ                            | 2   | -786.89671989 | -786.88989513 | -1292.76672672 | -1292.76547058 | -2135.87315590 | -2135.87562281 |
| DLPNO-CCSD(T) (correlation correction) | n   |               |               |                |                |                |                |
| aug-cc-pVQZ                            | 4   | -3.84468785   | -3.84565862   | -6.33208117    | -6.33300258    |                |                |
| aug-cc-pVTZ                            | 3   | -3.68422854   | -3.68560625   | -6.06953765    | -6.07091153    | -10.07352512   | -10.07481413   |
| aug-cc-pVDZ                            | 2   | -3.11725913   | -3.12176600   | -5.13860898    | -5.14148463    | -8.53641350    | -8.53925865    |
| DLPNO-CCSD(T)=HF+correlation           | n   |               |               |                |                |                |                |
| aug-cc-pVQZ                            | 4   | -790.99912624 | -791.01376779 | -1299.51901725 | -1299.53717310 |                |                |
| aug-cc-pVTZ                            | 3   | -790.78770575 | -790.79693184 | -1299.17317271 | -1299.18598041 | -2146.49627921 | -2146.51265412 |
| aug-cc-pVDZ                            | 2   | -790.01397902 | -790.01166113 | -1297.90533570 | -1297.90695521 | -2144.40956940 | -2144.41488146 |
|                                        | m,n |               |               |                |                |                |                |
| CBS E <sub>scf</sub> (34)              | 34  | -787.16814429 | -787.18338099 | -1293.20933971 | -1293.22813422 |                |                |
| CBS E <sub>scf</sub> (23)              | 23  | -787.17422670 | -787.18709602 | -1293.21892042 | -1293.23469657 | -2136.61081897 | -2136.63022292 |
|                                        | m,n |               |               |                |                |                |                |
| CBS E <sub>corr</sub> (34)             | 34  | -3.95891715   | -3.95959822   | -6.51898314    | -6.51958245    |                |                |
| CBS E <sub>corr</sub> (23)             | 23  | -4.00511734   | -4.00472403   | -6.59641718    | -6.59694110    | -10.94348721   | -10.94389549   |
| Estimated CBS total energy (3/4)       |     | -791.12706144 | -791.14297922 | -1299.72832285 | -1299.74771666 |                |                |
| Estimated CBS total energy (2/3)       |     | -791.17934404 | -791.19182006 | -1299.81533761 | -1299.83163767 | -2147.55430619 | -2147.57411841 |

$$E_{SCF}(n) = E_{SCF}(CBS) + A \exp(-z \sqrt{n}) \quad (1)$$

$$E_{SCF}(CBS) = \frac{E_{SCF}(n) \exp(-z \sqrt{m}) - E_{SCF}(m) \exp(-z \sqrt{n})}{\exp(-z \sqrt{m}) - \exp(-z \sqrt{n})} \quad (2)$$

|                 |                 |
|-----------------|-----------------|
| Z <sub>23</sub> | Z <sub>34</sub> |
| 4.30            | 5.79            |

|                 |                 |
|-----------------|-----------------|
| Y <sub>23</sub> | Y <sub>34</sub> |
| 2.51            | 3.05            |

$$E_{corr}(n) = E_{corr}(CBS) + An^{-\gamma} \quad (3)$$

$$E_{corr}(CBS) = \frac{n^\gamma E_{corr}(n) - m^\gamma E_{corr}(m)}{n^\gamma - m^\gamma} \quad (4)$$

## Level of Theory and (NH<sub>3</sub>)<sub>8</sub><sup>-</sup> Electron Distribution

In Section values "Computational Methods" the validation of the adopted computational procedure by the available experimental data on single molecules as well as on water clusters, was reported.

Further analysis considered the spin densities visualization, an important parameter to understand electron localization (internal vs. external states) and cluster reactivity based on the DLPNO-CCSD(T)/aug-cc-pVQZ level of theory.

As such, the knowledge of the spin densities dependency vs. level of theory by comparing DFT and DLPNO-CCSD(T) results will give important clues to better understand/interpret the calculated data.

For such a scope, spin densities derived by two functionals (PBE0, BHandHLYP) and DLPNO-CCSD(T) by using, in each method, four different basis sets; def2-T(Q)ZVPPD, aug-cc-pVT(Q)Z; are performed and results are reported in Figure S3 and Figure S4.

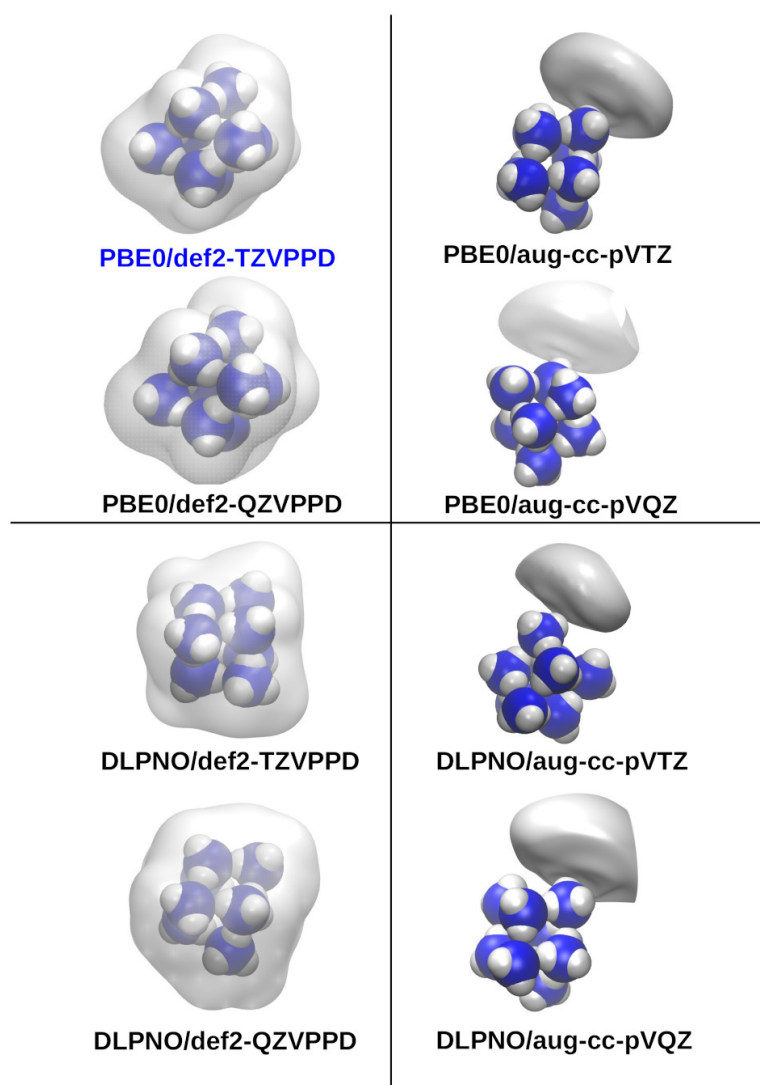

**Figure S3.** Spin densities calculated at different levels of theory based on the PBE0/def2-TZVPPD (NH<sub>3</sub>)<sub>8</sub><sup>-</sup> optimized structures. Isosurface value: 0.0001 a.u.

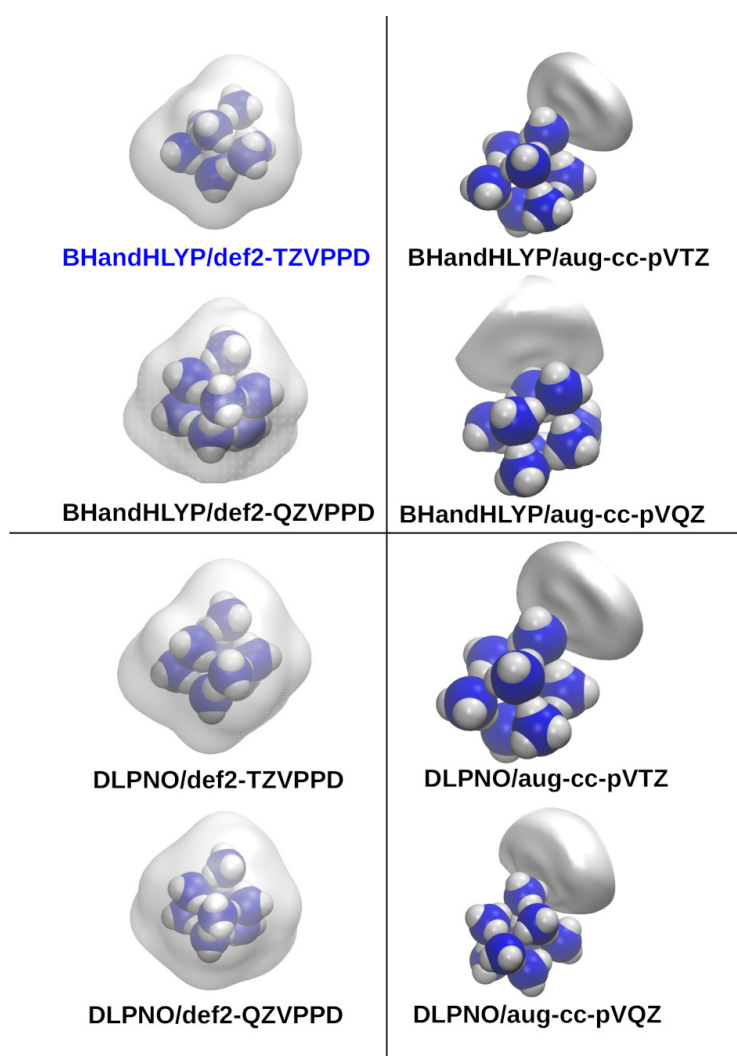

**Figure S4.** Spin densities calculated at different levels of theory based on the BHandHLYP/def2-TZVPPD  $(\text{NH}_3)_8^{\cdot-}$  optimized structure. Isosurface value: 0.0001 a.u.

The BHandHLYP functional (Becke1993) was included being reported as a good descriptor of the ammoniated electron in clusters (Baranyi2019, Baranyi2020).

By observing Figure S3 and Figure S4, the spin distribution shows a basis set dependency independent by the applied computational method.

In fact, while both def2-T(Q)ZVPPD basis sets report a spin density enveloping the entire cluster, the electron in both the aug-cc-pVT(Q)Z basis sets is always externally well localized. However due to the nature of the study, the correlation consistent basis sets should be the preferred one.

A further analysis was performed by comparing the EA estimated by the same computational methods applied to the spin density study.

| Method                    | def2-T | def2-Q | aug-T | aug-Q | $\Delta[\text{aug-Q-T}]$ |
|---------------------------|--------|--------|-------|-------|--------------------------|
| PBE0                      | -21.7  | -30.2  | 1.6   | 7.0   | 5.4                      |
| BHandHLYP                 | -26.8  | -23.1  | -2.1  | 3.2   | 5.3                      |
| DLPNO <sub>PBE0</sub>     | -28.2  | -24.5  | -2.5  | 1.2   | 3.7                      |
| DLPNO <sub>BHandLYP</sub> | -28.4  | -24.7  | -2.4  | 1.3   | 3.7                      |

**Table S2.** Calculated EA (kcal/mol) at different levels of theory based on the optimized geometries (PBE0/def2-TZVPPD; BHandLYP/def2-TZVPPD) of the neutral and radical-anion  $(\text{NH}_3)_8$

model clusters. Abbreviations: def2-T(Q)ZVPPD=def2-T(Q); aug-cc-pVT(Q)Z=aug-T(Q); DLPNO-CCSD(T) with optimized DFT/def2-TZVPPD input geometry=DLPNO<sub>DFT</sub>.

Assuming the DLPNO-CCSD(T)/aug-cc-pVQZ values as reference, both DFT functionals are in very good agreement reporting only a  $\Delta E_{\text{PBE0-BHandLYP}} = -0.1$  kcal/mol.

However, the general trend shows the correlation consistent basis sets to be the main "driving force" determining a good EA estimation also when coupled to DFT methods.

Furthermore though based only on eight data points and a cluster type and conformer, the  $\Delta[\text{aug-(Q-T)}]$  of the EA values as reported in Table S2 show a consistent  $\sim 5.3$  kcal/mol for both DFT functionals and 3.7 kcal/mol in case of the DLPNO-CCSD(T).

A similar trend was found on the calculated VAE based on the difference  $\Delta[\text{aug-(T-D)}]$  as reported in the Appendix A.

If confirmed on a larger data set based on different cluster dimensions and conformations, such trends can be used to extrapolate values when lower levels of theory are used.

#### REFERENCES

- Baranyi B., Turi L., 2019, *J. Chem. Phys.*, 151  
Baranyi B., Turi L., 2020, *J. Phys. Chem. B*, 124, 7205  
Becke A. D., 1993, *J. Chem. Phys.*, 98, 1372

## VAE dependency on the (NH<sub>3</sub>)<sub>23</sub> cluster geometry during a NVT AIMD simulation

As reported in Section 2, the amorphous (NH<sub>3</sub>)<sub>23</sub> cluster was obtained by "melting" two ammonia crystal cells (1×1×2) in an AIMD simulation.

In a later Section~\ref{sec:metval} while validating the adopted computational procedure on water clusters, the limitations in comparing experimental to computational data were listed: **I)** experimental data are measured on a finite T PES, while calculated geometries are based on a 0 K PES; **II)** experimental data are measured on a conformational ensemble to be compared to a singly or few computationally optimized cluster conformers.

As such, it was interesting to correlate changes in cluster conformational geometry to VAE during an AIMD simulation.

The VAE is computationally simple to obtain, measuring the neutral cluster ability to stabilize/accept an electron to become a radical-anion at the fixed neutral cluster geometry *i.e.* vertical excitation.

Specifically, eight geometries were extracted by the AIMD trajectory and on each single geometry a DLPNO-CCSD(T)/aug-cc-pVD(T)Z analysis, was conducted.

Results are reported in Table S3.

| t (ps) | VAE (DZ) | VAE (TZ) | $\Delta(\text{VAE})_{(\text{TZ-DZ})}$ |
|--------|----------|----------|---------------------------------------|
| 0.0    | 3.6      | -2.9     | -6.6                                  |
| 2.0    | 3.5      | -3.2     | -6.8                                  |
| 2.5    | 2.1      | -5.1     | -7.2                                  |
| 3.0    | 5.3      | -1.6     | -6.9                                  |
| 3.5    | 4.5      | -2.4     | -6.9                                  |
| 4.0    | 1.2      | -5.6     | -6.8                                  |
| 4.5    | 6.4      | 1.0      | -5.4                                  |
| 5.0    | 3.7      | -2.1     | -5.8                                  |

**Table S3.** Calculated VAE (kcal/mol) on single AIMD snapshots (T=210 K) of the (NH<sub>3</sub>)<sub>23</sub> cluster. Single points evaluated at the DLPNO-CCSD(T)/aug-cc-pVD(T)Z level of theory.

Though based on a simple evaluation by not considering, for example, Boltzmann weights or any population analysis, the results show considerable VAE fluctuations during cluster dynamics.

Notably, as reported in the ESI, by comparing the composite method r2-SCAN-3c (Gasevic2022) (potential energies) and the aug-cc-pVD(T)Z (electronic energies), do show the same trend reporting a MAD=0.6 kcal/mol (compared to aug-cc-pVTZ) proposing the composite electronic-structure method r2-SCAN-3c as a valid tool in cluster AIMD studies (at least in the neutral form).

As such, conformational changes at finite T are important for a better understanding of the cluster behavior and sophisticated AIMD enhanced sampling techniques to expand the conformational space exploration should be applied.

However, single point calculations at high level of theory (correlation consistent) can be properly used to estimate, on the selected AIMD geometric ensemble, electronic related parameters such as EA, VAE and VDE.

To be noticed, a quite constant  $\Delta(\text{VAE})_{(\text{TZ-DZ})} \approx 6.5$  kcal/mol between the double- $\zeta$  and triple- $\zeta$  basis sets, denoting a possible "correction parameter" characteristic of the theoretical level and cluster (number of NH<sub>3</sub>), as similarly found in the spin density distribution (see ESI "Level of Theory and (NH<sub>3</sub>)<sub>n</sub> Electron Distribution").

## REFERENCES

Thomas Gasevic, Julius B. Stückrath, Stefan Grimme, and Markus Bursch  
*J. Phys. Chem. A* **2022** 126 (23), 3826-3838 DOI: 10.1021/acs.jpca.2c02951

## AIMD

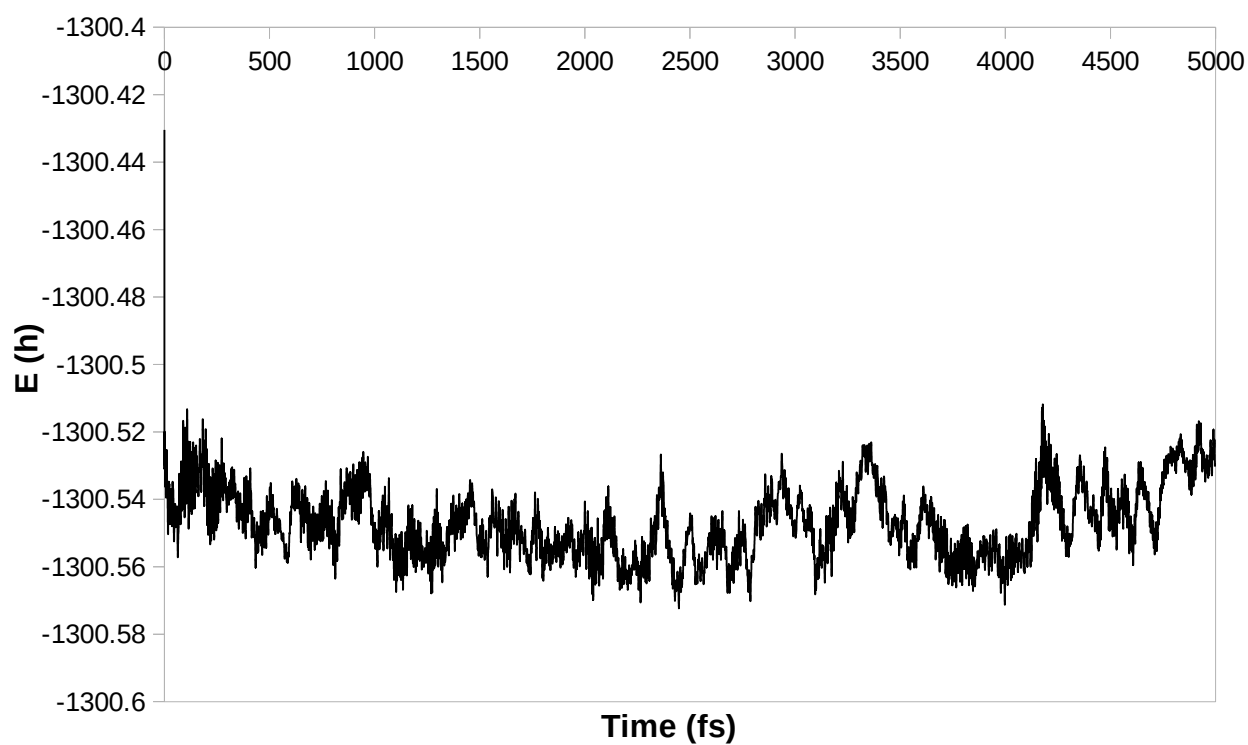

**Figure S5.** Potential energy time evolution of 23  $NH_3$  molecules, NVE,  $T=210$  K. Only the last 5ps of a 10 ps simulation are reported.



## AIMD : correlation r2-SCAN-3c with aug-cc-pVD(T)Z

| Simulation time (fs)      | 0              | 2000           | 2500           | 3000           | 3500           | 4000           | 4500            | 5000           |
|---------------------------|----------------|----------------|----------------|----------------|----------------|----------------|-----------------|----------------|
| SHOME/Neutral(TZ)         | 0fs            | 2000fs         | 2500fs         | 3000fs         | 3500fs         | 4000fs         | 4500fs          | 5000fs         |
| E_pot (AIMD, r2SCAN-3c)   | -1300.52876973 | -1300.54064459 | -1300.54493584 | -1300.54825785 | -1300.55002641 | -1300.55987042 | -1300.54514401  | -1300.52737086 |
| DLPNO-CCSD(T)/aug-cc-pVDZ | -1297.86635452 | -1297.87541010 | -1297.88493661 | -1297.88336004 | -1297.88889504 | -1297.89510379 | -1297.88819251  | -1297.86152378 |
| DLPNO-CCSD(T)/aug-cc-pVTZ | -1299.12059553 | -1299.13024475 | -1299.13726464 | -1299.13859682 | -1299.14334703 | -1299.15203753 | -1299.140473545 | -1299.12015285 |

|       |       |        |        |        |        |        |      |                           |
|-------|-------|--------|--------|--------|--------|--------|------|---------------------------|
| -0.88 | -8.33 | -11.02 | -13.11 | -14.22 | -20.39 | -11.15 | 0.00 | E_pot (AIMD, r2SCAN-3c)   |
| -3.03 | -8.71 | -14.69 | -13.70 | -17.18 | -21.07 | -16.73 | 0.00 | DLPNO-CCSD(T)/aug-cc-pVDZ |
| -0.28 | -6.33 | -10.74 | -11.57 | -14.55 | -20.01 | -12.75 | 0.00 | DLPNO-CCSD(T)/aug-cc-pVTZ |

|      |      |      |      |     |      |     |     |                                    | median |
|------|------|------|------|-----|------|-----|-----|------------------------------------|--------|
| 2.2  | 0.4  | 3.7  | 0.6  | 3.0 | 0.7  | 5.6 | 0.0 | $\Delta$ (r2SCAN-3c – aug-cc-pVDZ) | 2.2    |
| -0.6 | -2.0 | -0.3 | -1.5 | 0.3 | -0.4 | 1.6 | 0.0 | $\Delta$ (r2SCAN-3c – aug-cc-pVTZ) | -0.4   |

|     |     |     |     |     |     |     |     |         |
|-----|-----|-----|-----|-----|-----|-----|-----|---------|
| 0.0 | 1.8 | 1.5 | 1.6 | 0.8 | 1.5 | 3.4 | 2.2 | abs dev |
| 0.2 | 1.6 | 0.1 | 1.1 | 0.7 | 0.0 | 2.0 | 0.4 | abs dev |

|     |     |
|-----|-----|
| 1.3 | MAD |
| 0.6 | MAD |

### Figure S6.

**1<sup>st</sup> Table:** list of AIMD r2-SCAN-3c and aug-cc-pVD(T)Z potential energies (hartree) calculated on the selected time-shots;

**2<sup>nd</sup> Table:** potential energies differences subtracting the highest value in energy within the same set of data (kcal/mol);

**3<sup>rd</sup> Table:** differences between the r2-SCAN-3c and the aug-cc-pVD(T)Z calculated by the 2<sup>nd</sup> Table and median of the differences (kcal/mol);

**4<sup>th</sup> Table:** absolute deviations by Table 3 (kcal/mol);

**5<sup>th</sup> Table:** MAD (Median Absolute Deviation) by Table 4<sup>th</sup> (kcal/mol).

## AIMD snapshots: XYZ Coordinates (Coord.=Å)

### Neutral+Radical Anion input

Ofs

92

# ORCA AIMD Position Step 0, t=0.00 fs, E\_Pot=-1300.52876973 Hartree, Unit is Angstrom

|   |               |               |               |
|---|---------------|---------------|---------------|
| N | 6.3409889473  | 9.4343937027  | 0.0697164183  |
| H | 6.0386790025  | 9.1260673142  | 0.9807012059  |
| H | 6.5620012291  | 10.3753305083 | 0.0587013636  |
| H | 5.6045803572  | 9.2096365607  | -0.5361504531 |
| N | 1.3962307587  | 2.5106044097  | 0.2560356663  |
| N | 4.3832297025  | 2.1958270671  | 1.1736249999  |
| H | 0.8807777048  | 3.0577938001  | -0.4579340763 |
| H | 3.8659298491  | 2.7824916281  | 1.7445077973  |
| H | 2.3201844073  | 2.8571773168  | 0.3505162119  |
| H | 4.8494153807  | 1.6116701124  | 1.9310050977  |
| H | 1.5222490315  | 1.5320111221  | -0.0592894740 |
| H | 5.1778464486  | 2.7884754886  | 0.8372748869  |
| N | 9.2694773031  | 9.1940495290  | 4.0013802625  |
| N | 4.3517393080  | 6.3861168386  | 1.0427461714  |
| H | 9.4713904881  | 9.3615710758  | 4.9970847718  |
| H | 3.8646286580  | 7.2836892542  | 0.9343439844  |
| H | 8.9218480619  | 8.2512990388  | 4.0041882859  |
| H | 5.3671073304  | 6.5053531501  | 0.9359535269  |
| H | 10.1611022440 | 9.1360405983  | 3.4829134504  |
| H | 4.0448735108  | 5.7355220493  | 0.3062706338  |
| N | 0.8421044542  | 4.8109130911  | 3.2152769584  |
| N | 3.5430094754  | 5.4749990442  | 7.0242445416  |
| H | 0.9728912505  | 5.8151199504  | 3.2356973861  |
| H | 3.2561091739  | 5.0398950139  | 7.8968870632  |
| H | 1.1850407068  | 4.4998333564  | 2.2962144108  |
| H | 2.7825149505  | 5.9118398268  | 6.5337014921  |
| H | -0.1738212685 | 4.6559593710  | 3.1910872691  |
| H | 3.9931514904  | 4.8250891951  | 6.4040332525  |
| N | 7.3872753579  | 3.5887565326  | -0.6792091096 |
| N | 6.0145591248  | 9.7023261136  | 3.4507954203  |
| H | 7.9591348396  | 2.7498773692  | -0.4032715606 |
| H | 6.8794663771  | 9.9258008526  | 3.8810423361  |
| H | 7.8656659392  | 4.0629861796  | -1.4313380451 |
| H | 5.3165953109  | 10.3967983169 | 3.6861518829  |
| H | 7.4565521205  | 4.1419048563  | 0.1529603518  |
| H | 5.7006737812  | 8.7799454381  | 3.8795787310  |
| N | 5.8740071573  | -1.2944030425 | 3.8943812146  |
| N | 1.8833047806  | 1.8470640609  | 4.0472615851  |
| H | 6.8704865828  | -1.1997788590 | 3.7939409760  |
| H | 2.0263440130  | 2.1806733290  | 3.0468797613  |
| H | 5.6957824682  | -1.9318292127 | 4.6800907352  |
| H | 1.4469768315  | 0.9275080412  | 3.8827062439  |
| H | 5.5270781371  | -1.8179718947 | 3.1011527287  |
| H | 1.1571850075  | 2.3753771564  | 4.4576790402  |
| N | 6.6087381561  | 6.6815334959  | 4.8104923510  |
| N | 4.0913592021  | 4.6779694257  | 3.8325071332  |
| H | 7.5961403973  | 6.2687621443  | 4.8571496786  |
| H | 4.4034404206  | 5.0112660489  | 2.8976224131  |
| H | 6.2865066924  | 6.4169666206  | 5.7301970302  |
| H | 4.3192775390  | 3.7228059807  | 3.8938239257  |
| H | 6.0468978306  | 6.1529696632  | 4.1525861782  |
| H | 3.0974340890  | 4.7106886321  | 3.8653558070  |

|   |               |               |              |
|---|---------------|---------------|--------------|
| N | 5.0815253958  | 1.3001059686  | 5.2824906478 |
| H | 5.6141047975  | 1.2880624772  | 6.1352658222 |
| H | 4.1933936170  | 1.7009074735  | 5.4429686137 |
| H | 5.1034617218  | 0.4096386901  | 4.7581738977 |
| N | 7.2713846268  | 3.6443040287  | 3.1879537188 |
| H | 6.6710777508  | 4.0981644402  | 2.4924511329 |
| H | 6.7472084561  | 2.8125602698  | 3.4348297284 |
| H | 7.2675776529  | 4.2624448650  | 3.9885270578 |
| N | 6.8917127691  | 4.3734786124  | 7.5737845371 |
| H | 6.7110636713  | 4.3346666286  | 8.5540839238 |
| H | 5.9977293486  | 4.2776611950  | 7.1039227477 |
| H | 7.5063913033  | 3.6094077907  | 7.1884315793 |
| N | 9.8620121084  | 1.0882073954  | 2.5338571192 |
| N | 7.6506612306  | 6.8709457037  | 1.2944445986 |
| H | 9.6358260222  | 0.2640042439  | 3.1076814372 |
| H | 7.4542048549  | 7.5286129208  | 0.5432852160 |
| H | 9.2256762988  | 1.8311701700  | 2.8072012801 |
| H | 7.4983801612  | 7.2387774696  | 2.2173604797 |
| H | 9.7615426419  | 0.9026929903  | 1.5405361479 |
| H | 8.6032064612  | 6.6210710343  | 1.1282240180 |
| N | 10.7731693329 | -1.8049799459 | 5.2261441487 |
| N | 8.2823948153  | 0.7745524775  | 5.4006794269 |
| H | 10.8326678914 | -2.6309034543 | 4.6642960300 |
| H | 9.0598800058  | 1.2344749328  | 5.7952484374 |
| H | 10.0701157219 | -1.2240256539 | 4.7972398922 |
| H | 7.5723623159  | 1.4534183565  | 5.0815803464 |
| H | 11.6810987805 | -1.3615643746 | 5.2329944715 |
| H | 7.9277001815  | 0.3692464621  | 6.2385120844 |
| N | 10.0159460659 | 2.8610702430  | 7.7582422550 |
| N | 11.9824289902 | 2.3738110443  | 4.6631882660 |
| H | 10.2099621862 | 2.1834788578  | 8.4887219292 |
| H | 11.4744745083 | 1.9526580025  | 3.8349984604 |
| H | 10.5964351350 | 2.6768142494  | 6.8723019463 |
| H | 12.7851723627 | 2.8722987198  | 4.2677457758 |
| H | 10.3616371521 | 3.7548728817  | 8.1519858434 |
| H | 12.3166516142 | 1.5213711660  | 5.0747638667 |
| N | 4.8512085421  | -1.5382085840 | 7.6355994353 |
| H | 4.6180646758  | -0.6769026495 | 7.1006382564 |
| H | 5.7208654804  | -1.5012729321 | 8.0887403833 |
| H | 5.1409547329  | -2.2113012464 | 6.8954452832 |

## 2000fs

# ORCA AIMD Position Step 4000, t=2000.00 fs, E\_Pot=-1300.54064459 Hartree, Unit is Angstrom

|   |               |              |               |
|---|---------------|--------------|---------------|
| N | 9.9501766874  | 8.3251252404 | 3.4859308972  |
| H | 9.4642772673  | 8.4753356004 | 2.5817182460  |
| H | 9.9249922273  | 7.3835797986 | 3.8299925871  |
| H | 9.6734539727  | 9.0580246890 | 4.0686810075  |
| N | 1.0945570578  | 5.6598578975 | 0.1213164050  |
| N | 4.1427313892  | 4.3170088179 | 1.2598274777  |
| H | 1.6209481603  | 5.8121383297 | 1.0142188396  |
| H | 4.8302535828  | 3.5696522971 | 1.2102444933  |
| H | 1.7741531709  | 5.9818459653 | -0.5487395508 |
| H | 3.5878425294  | 4.2492144827 | 0.3552639214  |
| H | 0.4241665193  | 6.4463346306 | 0.1167147988  |
| H | 4.7322874522  | 5.1356464346 | 1.2155455514  |
| N | 11.8510734848 | 5.0450531472 | 5.4597285336  |
| N | 6.2052997533  | 7.2612473718 | 1.2161644632  |
| H | 12.4736612852 | 5.8064608253 | 5.3057392647  |

|   |               |               |               |
|---|---------------|---------------|---------------|
| H | 5.9697506982  | 7.7672328521  | 2.0529647432  |
| H | 11.1218113644 | 5.0469489400  | 4.7402473170  |
| H | 6.9862534382  | 6.6647442349  | 1.3301274752  |
| H | 11.3508113412 | 5.1912178253  | 6.3663955800  |
| H | 6.4180568867  | 7.9331637851  | 0.5155476415  |
| N | 1.7973760711  | 3.3834760546  | 3.2951875815  |
| N | 4.0213725901  | 5.9335813611  | 8.1584415842  |
| H | 1.2808732479  | 3.8904046314  | 3.9601594984  |
| H | 4.5658667272  | 5.2342199859  | 7.6745032359  |
| H | 2.4524113756  | 3.9996310881  | 2.7832967949  |
| H | 3.0442010443  | 5.6499562722  | 8.1433828833  |
| H | 1.1085450069  | 3.1896931979  | 2.5792346309  |
| H | 4.1261472945  | 6.7355688541  | 7.5779211421  |
| N | 9.3323129478  | 6.9475010665  | -0.1814060149 |
| N | 7.3517674192  | 5.3476433944  | 7.9132716574  |
| H | 9.6234670112  | 7.8621851016  | -0.5989887212 |
| H | 6.7470580243  | 6.1401411123  | 8.2318123486  |
| H | 10.1627878730 | 6.5333577680  | 0.1073625459  |
| H | 6.9661120411  | 4.5552295985  | 8.3475311475  |
| H | 9.0716417259  | 6.4152837211  | -1.0058946608 |
| H | 8.3120198056  | 5.4301558090  | 8.2917188506  |
| N | 6.6546767715  | 0.8543115256  | -0.2760954220 |
| N | 3.2777825032  | 2.0832531112  | 5.9787038068  |
| H | 5.8466087968  | 0.9075028869  | 0.3481236393  |
| H | 4.2763815114  | 1.9724442897  | 5.7014698969  |
| H | 6.9978641137  | 1.8030597937  | -0.4024380802 |
| H | 3.0778787448  | 1.2944791639  | 6.6293603194  |
| H | 6.3566371218  | 0.5599004867  | -1.1994676145 |
| H | 2.7266005525  | 2.1004274132  | 5.1238765834  |
| N | 6.2636932525  | 7.5688093461  | 5.1058434011  |
| N | 4.8245870715  | 4.6084129297  | 5.0027377456  |
| H | 6.2730955486  | 8.4978130027  | 5.4182282459  |
| H | 4.0397051395  | 4.2578241308  | 5.5262922775  |
| H | 6.8920618613  | 7.0827263767  | 5.7814076255  |
| H | 5.1755727274  | 5.5676835791  | 5.3222189942  |
| H | 6.8605966880  | 7.5352491966  | 4.2445113572  |
| H | 4.5903038012  | 4.7774552575  | 4.0068517912  |
| N | 5.9570090751  | 2.2704100474  | 2.6875472661  |
| H | 5.2747777327  | 2.7116502097  | 3.2756401344  |
| H | 5.6835989770  | 1.3158189748  | 2.7400076923  |
| H | 6.9493058295  | 2.4013891876  | 2.9106029059  |
| N | 8.4674477325  | 3.9042201946  | 1.1070904480  |
| H | 7.4745476935  | 3.8171374016  | 1.3334754695  |
| H | 8.7625811769  | 2.9517318828  | 1.3082904615  |
| H | 8.9368940601  | 4.4567942863  | 1.7957462871  |
| N | 8.5093857175  | 4.8061959511  | 4.7469139727  |
| H | 7.7046205929  | 4.7426266785  | 4.1562586602  |
| H | 8.8768296771  | 3.8656674756  | 4.6772511730  |
| H | 8.1031204241  | 4.7571218241  | 5.7165267157  |
| N | 9.1243311397  | 0.2692238264  | 2.7330785400  |
| N | 11.6152606309 | 5.8562704234  | 1.6131862613  |
| H | 8.1849636733  | 0.3114937090  | 2.3625038703  |
| H | 11.3240640098 | 5.2480471044  | 2.3789332402  |
| H | 9.7129913608  | -0.0412314578 | 1.9695366374  |
| H | 12.6022700184 | 5.6294572005  | 1.5002894728  |
| H | 9.1278551724  | -0.4835637195 | 3.3867540469  |
| H | 11.5991394192 | 6.7857949168  | 1.9845645096  |
| N | 2.1483265226  | -1.8180826526 | 3.0769250537  |
| N | 5.3349421021  | -1.3738311240 | 2.7947242136  |
| H | 1.3055431481  | -1.6608169536 | 2.5572601687  |

|   |              |               |              |
|---|--------------|---------------|--------------|
| H | 5.7683079599 | -1.4530412323 | 1.8908273040 |
| H | 1.9929551314 | -2.6978736458 | 3.5796017958 |
| H | 5.9629816261 | -1.8737322451 | 3.4100791679 |
| H | 2.3096442337 | -1.0375772637 | 3.7016966230 |
| H | 4.3905646482 | -1.7268118589 | 2.7972460044 |
| N | 5.4559603574 | 2.8383257664  | 8.9563255546 |
| N | 4.5769125862 | -1.1986148595 | 6.3156338839 |
| H | 5.9889692259 | 2.3958322756  | 8.2302714093 |
| H | 4.7607741204 | -0.8571786695 | 5.4080019822 |
| H | 5.2826701016 | 2.1654884835  | 9.7206882934 |
| H | 4.9091484806 | -0.5665860253 | 7.0439512661 |
| H | 4.6865497999 | 3.3670994435  | 8.5561868115 |
| H | 5.2218890005 | -1.9672500643 | 6.4514645760 |
| N | 6.7047960610 | 2.0684056340  | 6.0800243251 |
| H | 6.4897413623 | 2.9994267594  | 5.5940246153 |
| H | 7.6654377127 | 2.0851041859  | 6.3134853717 |
| H | 6.5142136290 | 1.3916819676  | 5.3407686495 |

## 2500fs

92

# ORCA AIMD Position Step 5000, t=2500.00 fs, E\_Pot=-1300.54493584 Hartree, Unit is Angstrom

|   |               |              |               |
|---|---------------|--------------|---------------|
| N | 9.2627555839  | 7.3013855881 | 3.7433859221  |
| H | 9.4141699412  | 8.3350659986 | 3.9064659718  |
| H | 8.3261608091  | 6.8855907310 | 3.7987942336  |
| H | 9.9419825387  | 6.7924069782 | 4.2581270190  |
| N | 2.8803426801  | 6.5089175444 | 3.1786753250  |
| N | 5.8341822650  | 4.1648200301 | 0.5670444749  |
| H | 3.7841400252  | 6.8633618258 | 3.5693334128  |
| H | 6.7113593222  | 3.6746243897 | 0.8036745526  |
| H | 2.9539098761  | 5.5107615730 | 3.3174221977  |
| H | 6.1777068967  | 5.0163952061 | 0.2468096745  |
| H | 3.1089418874  | 6.5889109561 | 2.1482119601  |
| H | 5.3584826596  | 4.2197831172 | 1.4855567666  |
| N | 12.5400380860 | 4.7074571257 | 4.4923304825  |
| N | 6.3290235590  | 7.8056542331 | 2.7581475493  |
| H | 11.8697900065 | 5.3692644257 | 4.8347632624  |
| H | 6.4115885210  | 8.2909157889 | 3.6978211846  |
| H | 12.0937368495 | 4.0274428533 | 3.8532630527  |
| H | 7.2206089388  | 7.7620094920 | 2.2216156426  |
| H | 12.9062625458 | 4.2040962398 | 5.3130464183  |
| H | 5.7676387680  | 8.4698275088 | 2.2394831189  |
| N | 3.6206424886  | 2.8946621017 | 2.4399194277  |
| N | 3.2683259848  | 6.0279479358 | 6.1979775449  |
| H | 3.4178074130  | 3.4595291059 | 1.5902571796  |
| H | 3.4172663512  | 5.0731887742 | 5.9209899067  |
| H | 2.7950645481  | 2.4950089180 | 2.8333979255  |
| H | 2.4841861336  | 6.1108200898 | 6.8332130751  |
| H | 4.0604964138  | 3.5585086555 | 3.1008886391  |
| H | 2.9755993598  | 6.5174648926 | 5.3787767078  |
| N | 8.7409596031  | 7.2590203336 | -0.1699320353 |
| N | 6.2653620659  | 3.6718121055 | 7.6842542816  |
| H | 9.0432921022  | 6.2692805512 | -0.4237523600 |
| H | 5.3785531212  | 3.5869442446 | 7.2483430219  |
| H | 9.1398578288  | 7.8937172401 | -0.8622614861 |
| H | 6.0303120913  | 3.8325563256 | 8.6943341312  |
| H | 9.2418237867  | 7.4215431262 | 0.6793692288  |
| H | 6.7139294374  | 4.5052841783 | 7.3800210210  |
| N | 7.4166447721  | 1.2378514685 | -0.8559422969 |

|   |               |               |               |
|---|---------------|---------------|---------------|
| N | 3.9816257589  | 1.6021594668  | 5.9724754155  |
| H | 6.4147169602  | 1.4063026532  | -0.8465087875 |
| H | 4.8160592153  | 1.1992990936  | 6.4195052397  |
| H | 7.7915355129  | 2.1560452135  | -0.6242349302 |
| H | 3.2087374559  | 1.5164985908  | 6.5671609412  |
| H | 7.7560922033  | 0.9372797097  | -1.7595053043 |
| H | 3.7719307349  | 1.1547256776  | 5.0915329281  |
| N | 6.4068068615  | 8.3732078639  | 5.6885476801  |
| N | 6.7706927361  | 5.0081130140  | 4.1820087156  |
| H | 5.8330940479  | 7.6383543788  | 6.0972440408  |
| H | 6.0592978131  | 4.5245490191  | 4.6940099178  |
| H | 7.4026660825  | 8.0681496970  | 5.6439597194  |
| H | 6.4103290686  | 5.5422338883  | 3.4093566198  |
| H | 6.3545421048  | 9.1828078877  | 6.3246390479  |
| H | 7.2629196689  | 4.2671731080  | 3.6954110449  |
| N | 7.0524255126  | 1.2138531468  | 3.5607596967  |
| H | 6.8557269213  | 0.9368359178  | 4.5397228083  |
| H | 6.1499904009  | 1.5756878811  | 3.2051680400  |
| H | 7.1120221355  | 0.3652412286  | 3.0054579187  |
| N | 9.1415647242  | 2.9591157348  | 1.3684583724  |
| H | 9.1937331332  | 3.1438133585  | 2.3675279486  |
| H | 9.1190484597  | 1.9600205766  | 1.2640088249  |
| H | 9.9048236879  | 3.3990680480  | 0.9062678740  |
| N | 9.2892782696  | 5.3280156303  | 6.3295987552  |
| H | 8.5388848195  | 5.3202237133  | 5.6374260906  |
| H | 9.1280276889  | 4.6383729779  | 7.0465639416  |
| H | 9.4379875742  | 6.2431622745  | 6.7087050744  |
| N | 7.7460850959  | -1.1433944439 | 1.1279463582  |
| N | 11.0528396258 | 5.4981263179  | 1.1215050950  |
| H | 7.7624885663  | -0.3631109958 | 0.4486295207  |
| H | 11.8475577854 | 5.1864797590  | 1.6379436012  |
| H | 8.7230024277  | -1.4209060059 | 1.2490677403  |
| H | 11.3749039002 | 5.7245463407  | 0.1912034812  |
| H | 7.3378291240  | -1.9218608128 | 0.5945954449  |
| H | 10.7623666166 | 6.3811789554  | 1.5743463975  |
| N | 0.8232917896  | 1.7548021078  | 3.7918853738  |
| N | 4.1610418940  | -0.3310510890 | 1.6700186893  |
| H | 1.1678524706  | 0.7794545575  | 3.9849438809  |
| H | 5.0930796892  | -0.7529253073 | 1.4590724514  |
| H | 1.0167922874  | 2.1968872579  | 4.6937970483  |
| H | 3.6798092774  | -0.5250180368 | 0.7570889296  |
| H | -0.1719772337 | 1.6232664694  | 3.6095498860  |
| H | 4.2397971620  | 0.7202692395  | 1.7395284751  |
| N | 2.8059651551  | 3.9827369892  | 9.5865975916  |
| N | 2.4262837658  | -1.0775232685 | 4.5936124943  |
| H | 1.8596679489  | 4.1833544951  | 9.8303773270  |
| H | 2.9977290056  | -1.3199544573 | 3.7393989232  |
| H | 3.2892270360  | 4.8133131351  | 9.3214970026  |
| H | 3.0717537967  | -1.0907174803 | 5.3732099416  |
| H | 2.8545067024  | 3.2741323348  | 8.8789408898  |
| H | 1.7795354061  | -1.8149411637 | 4.8325095805  |
| N | 6.7928720955  | 0.2801254169  | 7.5043584694  |
| H | 7.2416396803  | 1.0906975237  | 7.2299455257  |
| H | 6.5575977771  | 0.3868187864  | 8.4664560388  |
| H | 7.4748517705  | -0.4863199067 | 7.3979231771  |

**3000fs**

92

# ORCA AIMD Position Step 6000, t=3000.00 fs, E\_Pot=-1300.54825785 Hartree, Unit is Angstrom

|   |               |              |               |
|---|---------------|--------------|---------------|
| N | 10.0588547546 | 6.0813163950 | 4.2397093886  |
| H | 9.3423365361  | 6.5526576775 | 3.6909876181  |
| H | 9.6659234343  | 5.1918143687 | 4.5833938192  |
| H | 10.3027493424 | 6.6378624563 | 5.0062461529  |
| N | 3.8119671695  | 6.8815935758 | 3.5861959899  |
| N | 6.0145183374  | 4.7906424916 | -0.2309497631 |
| H | 3.5113941237  | 7.6217028207 | 4.1832106092  |
| H | 6.9622449228  | 4.6003656639 | 0.0814948503  |
| H | 4.1372239561  | 7.3909032791 | 2.7907960293  |
| H | 5.8667431522  | 4.0231044335 | -0.9507019485 |
| H | 2.9673425997  | 6.4570320907 | 3.1866445894  |
| H | 6.1198334994  | 5.6894451518 | -0.6778158997 |
| N | 10.7051711179 | 2.8135475433 | 6.1818621593  |
| N | 6.7511028574  | 8.0584021640 | 2.5937285031  |
| H | 10.4244572166 | 3.4204965816 | 6.9550356615  |
| H | 6.4089827521  | 7.3454789470 | 3.2139551588  |
| H | 11.7003454301 | 2.8783554484 | 5.9621814934  |
| H | 7.0884558567  | 7.7304842011 | 1.7314282325  |
| H | 10.1525714656 | 2.9703392095 | 5.3455723757  |
| H | 7.5299452321  | 8.3856216369 | 3.1110475634  |
| N | 3.4297116658  | 2.9133673674 | 1.4963133478  |
| N | 3.4997198697  | 4.6828789725 | 5.9916277517  |
| H | 3.8830210530  | 3.6659084284 | 0.9676401075  |
| H | 3.5881441220  | 3.7954548424 | 5.5236682752  |
| H | 2.4632790707  | 2.8631848982 | 1.2955436802  |
| H | 4.2336847571  | 5.2375972916 | 5.5607469651  |
| H | 3.6355607292  | 3.0856089241 | 2.4973439122  |
| H | 3.8642556685  | 4.5645218415 | 6.9298468592  |
| N | 8.5469981807  | 7.1306416301 | -0.3980053559 |
| N | 7.0465330532  | 3.7975968316 | 7.6627213024  |
| H | 9.3330872128  | 6.5314737513 | -0.1170977698 |
| H | 6.6681660125  | 3.0822167391 | 6.9762409524  |
| H | 8.4148187313  | 7.0274134898 | -1.4115516437 |
| H | 6.3790044597  | 3.8144745180 | 8.4012961606  |
| H | 8.9184804416  | 8.1258544601 | -0.2922139287 |
| H | 6.8011285294  | 4.6799338486 | 7.2330794774  |
| N | 6.3414157731  | 1.3174779191 | -0.2197931873 |
| N | 3.8259666289  | 1.6895230699 | 4.6317660893  |
| H | 5.6710328596  | 1.1787881577 | -0.9595161260 |
| H | 3.9953478129  | 0.9762522840 | 5.2975930261  |
| H | 5.8898611872  | 1.9683043282 | 0.4228934978  |
| H | 2.8074396210  | 1.6278715143 | 4.3408907124  |
| H | 7.1523717881  | 1.7599507365 | -0.6281933675 |
| H | 4.3252351048  | 1.2675635700 | 3.8530032918  |
| N | 7.4741968200  | 6.9699615742 | 6.7386848546  |
| N | 6.6932118793  | 4.3995868585 | 4.1627068451  |
| H | 8.3084393927  | 7.3582254479 | 7.1492803194  |
| H | 5.9590021192  | 4.1992110669 | 4.8358108787  |
| H | 7.7986589245  | 6.3565304685 | 5.9903846936  |
| H | 6.3146710006  | 4.9427655957 | 3.4116025750  |
| H | 6.9930997071  | 7.7810469448 | 6.3468419386  |
| H | 6.9629768335  | 3.4973970582 | 3.7449612673  |
| N | 7.5443871473  | 1.4273853671 | 3.1645943437  |
| H | 7.3874596158  | 1.3794403176 | 4.1699039296  |
| H | 6.7281832339  | 0.9838152180 | 2.7745434543  |
| H | 8.2903651441  | 0.7939288343 | 2.8511751538  |

|   |               |               |               |
|---|---------------|---------------|---------------|
| N | 8.7118703940  | 3.7946645516  | 1.0640693297  |
| H | 9.5609185437  | 3.6780215277  | 0.5195603475  |
| H | 8.7658243985  | 4.5563669108  | 1.7136418294  |
| H | 8.5510280840  | 2.9528706179  | 1.6313120565  |
| N | 10.0287803578 | 3.6504289289  | 9.3400788206  |
| H | 9.0803091266  | 3.7486364493  | 8.9495401003  |
| H | 10.2160880087 | 2.6641301148  | 9.4267280932  |
| H | 10.1508818476 | 4.1552962468  | 10.2295418061 |
| N | 8.2773788599  | -1.2390024448 | 1.3955046841  |
| N | 11.5022790533 | 5.7955544702  | 0.9936094136  |
| H | 7.6219610227  | -0.9328279403 | 0.6987697598  |
| H | 11.6040028521 | 4.9680872408  | 1.5808328219  |
| H | 9.1099119228  | -1.6876595947 | 1.0132657472  |
| H | 12.3487876704 | 5.8611334182  | 0.3902601610  |
| H | 7.7702676768  | -1.8985686290 | 1.9623435417  |
| H | 11.5342785391 | 6.5597904952  | 1.6418706523  |
| N | -1.1491216020 | 5.1459954509  | 4.9978857517  |
| N | 3.8916825777  | -0.3990668032 | 1.1495146641  |
| H | -0.3361317518 | 5.1840878058  | 5.6410175557  |
| H | 4.6720505386  | -0.7479967644 | 0.6432028248  |
| H | -1.9784364681 | 4.8913679640  | 5.5519940784  |
| H | 4.0192866227  | 0.5742390334  | 1.1287048125  |
| H | -0.8575362633 | 4.3369719922  | 4.4272525172  |
| H | 4.0781290053  | -0.6698542565 | 2.1273990919  |
| N | 3.6604559608  | 4.9236928335  | 9.1636165394  |
| N | 0.9935225986  | 0.6854277624  | 2.1462317501  |
| H | 2.9918910064  | 4.2567387927  | 9.5216895552  |
| H | 1.7006889512  | 0.2728747053  | 1.5535513684  |
| H | 4.0214114848  | 5.2772716794  | 10.0153418946 |
| H | 0.3003592940  | -0.0457068043 | 2.3488679564  |
| H | 2.9691458580  | 5.6048996521  | 8.8234655306  |
| H | 0.4592526462  | 1.2765239078  | 1.5120471512  |
| N | 6.9481006288  | -0.1981501842 | 6.7514070142  |
| H | 7.3451765242  | 0.6148420653  | 7.1563126404  |
| H | 6.7667614929  | -0.8487715878 | 7.5301009758  |
| H | 7.8180606161  | -0.6585403617 | 6.3886008274  |

### 3500fs

92

# ORCA AIMD Position Step 7000, t=3500.00 fs, E\_Pot=-1300.55002641 Hartree, Unit is Angstrom

|   |               |               |               |
|---|---------------|---------------|---------------|
| N | 10.2935918830 | 3.4874289691  | 4.7589770280  |
| H | 10.2925602519 | 4.3017367634  | 5.3454697795  |
| H | 9.3079828299  | 3.3820449357  | 4.6601561196  |
| H | 10.4663924718 | 2.6772032884  | 5.3882340476  |
| N | 3.5777039704  | 6.2556619705  | 3.8103102268  |
| N | 6.3531757228  | 5.9491960571  | 0.2630925545  |
| H | 2.6290023334  | 6.0334992983  | 3.9628058487  |
| H | 7.0119902117  | 5.2098805034  | 0.1960441950  |
| H | 3.7128340282  | 7.1511187537  | 4.1752397944  |
| H | 6.1060795138  | 6.2545785535  | -0.7013905398 |
| H | 3.8094878751  | 6.3350348936  | 2.8233561504  |
| H | 6.9139689338  | 6.7039266024  | 0.7195960126  |
| N | 9.1636332284  | -0.3702107600 | 5.6677232320  |
| N | 7.6054132357  | 8.3694772259  | 1.9789772961  |
| H | 9.8072773165  | -0.7174209045 | 4.9431504000  |
| H | 8.4170219414  | 8.7162806719  | 2.4203510068  |
| H | 8.9498174614  | 0.6149146985  | 5.4335424012  |



|   |               |               |               |
|---|---------------|---------------|---------------|
| H | 6.9124241574  | 9.1433687187  | 1.9758016922  |
| H | 9.6862590019  | -0.3556147872 | 6.5315108719  |
| H | 7.3031401803  | 7.6816771546  | 2.6924486625  |
| N | 4.3888382053  | 3.2372894632  | 2.3595254286  |
| N | 2.3375625822  | 4.4643747559  | 6.8264715898  |
| H | 4.9866588150  | 3.9010066581  | 1.8321442812  |
| H | 2.4326363943  | 3.4925123801  | 7.0622205707  |
| H | 3.6057440589  | 3.1215628932  | 1.7285891066  |
| H | 2.9720783864  | 4.5704787720  | 6.0305966635  |
| H | 4.0678972624  | 3.7326456054  | 3.1574352373  |
| H | 2.7565429357  | 5.0672651966  | 7.5201424620  |
| N | 10.2810517801 | 8.2191826393  | -0.8244132055 |
| N | 5.2348627310  | 2.5340700533  | 7.4435922087  |
| H | 10.6595720162 | 7.3421778744  | -1.0940897783 |
| H | 5.5094167548  | 1.5640629028  | 7.4464034760  |
| H | 9.3460657728  | 7.9966160736  | -0.5295786215 |
| H | 4.4730999730  | 2.4666256148  | 6.7258616732  |
| H | 10.1592992704 | 8.7372148640  | -1.7313060732 |
| H | 5.9708687327  | 2.9697301341  | 6.8289880174  |
| N | 6.4778350915  | 2.0901984869  | -0.1937591750 |
| N | 2.9177950032  | 0.9392318459  | 5.4547192524  |
| H | 5.5466364021  | 1.7067382377  | -0.1154454980 |
| H | 3.4602056930  | 1.4723834180  | 4.7739400477  |
| H | 6.5314695535  | 2.6829616429  | 0.6273910399  |
| H | 3.3561675586  | 0.0080698645  | 5.6446819303  |
| H | 6.3650885850  | 2.7238925862  | -0.9807425679 |
| H | 2.0376361504  | 0.8522067752  | 4.9800361574  |
| N | 6.1922324408  | 5.7183110121  | 5.8468530364  |
| N | 7.3779768812  | 5.2706449528  | 2.9797593829  |
| H | 6.0598912815  | 6.4302332722  | 6.5710851702  |
| H | 7.4164101108  | 4.5589115184  | 3.7239064394  |
| H | 6.7921964772  | 6.1518527609  | 5.1502612394  |
| H | 6.5071352841  | 5.2642954078  | 2.4685478381  |
| H | 5.2914877500  | 5.6995634483  | 5.3910080516  |
| H | 8.0501817482  | 4.9259733858  | 2.3258653672  |
| N | 7.2719468823  | 2.0335958830  | 3.9066889716  |
| H | 7.0193968539  | 1.6534271943  | 4.7991435428  |
| H | 6.3770843489  | 2.1034975843  | 3.4320585309  |
| H | 7.8747551074  | 1.4096619694  | 3.3975535316  |
| N | 9.3523032716  | 3.9840085520  | 0.8052188825  |
| H | 9.9134739500  | 4.4093195596  | 1.5569355924  |
| H | 9.3313464351  | 2.9774439511  | 0.9886643476  |
| H | 9.9154103927  | 4.2126996690  | -0.0135061056 |
| N | 9.0360379451  | 1.9635335637  | 8.3518804486  |
| H | 8.0677263014  | 2.1825028956  | 8.2411995848  |
| H | 9.3761798344  | 2.3861871542  | 9.2143880957  |
| H | 9.4914096285  | 2.3501961862  | 7.4928191922  |
| N | 8.5921710338  | 0.1574716345  | 1.1195963717  |
| N | 11.6230916876 | 5.7750573579  | 1.6603312373  |
| H | 9.2092362993  | -0.3144403512 | 0.4511806646  |
| H | 11.1724562255 | 6.6779399487  | 1.6921193290  |
| H | 8.0211062811  | -0.5633192229 | 1.5949715355  |
| H | 11.6675163812 | 5.4491408061  | 2.6226619494  |
| H | 7.9701078120  | 0.6227519703  | 0.4664931185  |
| H | 12.5791808241 | 5.9883239274  | 1.4059000446  |
| N | 0.6118558171  | 6.5449090060  | 4.7377548060  |
| N | 3.2288090422  | 0.3119599265  | 1.7195916850  |
| H | -0.3884171772 | 6.6202477386  | 4.8913514741  |
| H | 2.9158151355  | 0.3988600624  | 0.7548369949  |
| H | 1.0704814290  | 5.9293016933  | 5.4421867868  |

|   |              |               |               |
|---|--------------|---------------|---------------|
| H | 3.9856114765 | 1.0106014185  | 1.9720796903  |
| H | 0.9273248584 | 7.4822367200  | 5.0228017045  |
| H | 3.6522614001 | -0.6295493154 | 1.8999679771  |
| N | 4.6915711024 | 5.4676011215  | 9.3837989098  |
| N | 1.3719040010 | 3.0728167788  | 1.3325751386  |
| H | 5.4891825098 | 6.0675471486  | 9.1281287958  |
| H | 1.3628177501 | 2.1958373921  | 1.7822232800  |
| H | 5.0834366359 | 5.1676812735  | 10.2213459067 |
| H | 1.1561391408 | 3.7956390396  | 1.9958417353  |
| H | 4.7838156396 | 4.6986291900  | 8.7211783710  |
| H | 0.6094396293 | 3.0667436127  | 0.6871750753  |
| N | 6.6565814439 | -0.5149914389 | 7.3057419150  |
| H | 5.9618882959 | -1.2432800120 | 7.5098585004  |
| H | 7.3230036475 | -0.7419781993 | 6.6179197517  |
| H | 7.2256000797 | -0.4292500909 | 8.1352981261  |

#### 4000fs

92

# ORCA AIMD Position Step 8000, t=4000.00 fs, E\_Pot=-1300.55987042 Hartree, Unit is Angstrom

|   |               |               |               |
|---|---------------|---------------|---------------|
| N | 10.0721911885 | 1.9514400814  | 4.2647907689  |
| H | 9.0933664712  | 2.0133914728  | 4.3401863455  |
| H | 10.4801291905 | 1.3097161299  | 4.9914361432  |
| H | 10.5886882837 | 2.8517357321  | 4.3841072446  |
| N | 4.0099509520  | 9.2617219515  | 1.6697316695  |
| N | 7.1171852616  | 5.3689349844  | 0.7705558594  |
| H | 3.7186628114  | 8.6885415089  | 0.8998651830  |
| H | 7.8373032388  | 5.2855293164  | 0.0813355946  |
| H | 3.5071086442  | 8.8334275998  | 2.5119999623  |
| H | 6.2621615410  | 5.3542817738  | 0.3002337706  |
| H | 3.6335905104  | 10.2000966494 | 1.6166920284  |
| H | 7.1985802757  | 6.3055955251  | 1.2299964199  |
| N | 8.8411722808  | -2.3819318085 | 4.4932495192  |
| N | 6.9552367860  | 8.1978615164  | 2.3778754463  |
| H | 9.4827198914  | -1.8252460013 | 5.0079915343  |
| H | 7.6430898915  | 8.8392552358  | 2.8326822899  |
| H | 9.3750343893  | -3.2446718964 | 4.3914350483  |
| H | 6.1539368652  | 8.7489782565  | 2.1343446256  |
| H | 8.8657945832  | -1.9393144704 | 3.5838358646  |
| H | 6.6814323763  | 7.5113581468  | 3.1338072215  |
| N | 4.7406170032  | 4.7162324690  | 2.9629227012  |
| N | 2.1510422447  | 5.2305227979  | 6.7310674666  |
| H | 5.5965895096  | 4.5053439081  | 2.4884561901  |
| H | 2.4373107587  | 4.2390622087  | 6.7027877630  |
| H | 4.2746390902  | 5.4579200202  | 2.4490988187  |
| H | 2.4692596498  | 5.5315843554  | 7.6554436556  |
| H | 4.9800081321  | 5.1107128374  | 3.9040289172  |
| H | 1.1354494741  | 5.2939996699  | 6.7969158367  |
| N | 9.5809774801  | 7.7959635778  | -0.2745365224 |
| N | 4.7471038629  | 1.8961611316  | 7.3228623723  |
| H | 9.1775223501  | 7.3753657417  | -1.0775331705 |
| H | 4.9602155520  | 0.9388603617  | 7.1158213689  |
| H | 9.9562103183  | 7.0627588678  | 0.2677643784  |
| H | 3.8034070927  | 2.0462699129  | 6.9694607275  |
| H | 8.7951291051  | 8.1109755798  | 0.2627125124  |
| H | 5.3524481563  | 2.5030510552  | 6.8789710080  |
| N | 7.7719395252  | 2.0517202311  | -0.2067550562 |
| N | 1.5520695456  | 1.7945266881  | 6.2344720479  |
| H | 7.1245275998  | 2.0248996201  | -0.9656424252 |

|   |               |               |               |
|---|---------------|---------------|---------------|
| H | 1.6424324178  | 2.1247002650  | 5.2434795333  |
| H | 7.3754626244  | 2.4573569812  | 0.6193628416  |
| H | 1.5093038529  | 0.7653680271  | 6.2542148949  |
| H | 8.5149158244  | 2.6662981914  | -0.5038252330 |
| H | 0.6393226618  | 2.1069702492  | 6.4579207651  |
| N | 5.7570053912  | 6.6238906613  | 5.8522018506  |
| N | 8.5521332176  | 4.9242362489  | 3.6421320822  |
| H | 5.5051960041  | 5.9459376389  | 6.5578290739  |
| H | 7.9772211662  | 5.3341351476  | 4.3953803669  |
| H | 6.2829817574  | 7.3442404866  | 6.4024040374  |
| H | 8.0245349166  | 5.0794331531  | 2.7944088945  |
| H | 4.8710996971  | 7.0681865628  | 5.5908148753  |
| H | 8.5233464904  | 3.9316482419  | 3.8446933367  |
| N | 6.7972595833  | 1.5405022756  | 4.0352265882  |
| H | 6.9465329335  | 0.9846332053  | 3.1871783480  |
| H | 6.3680538869  | 0.8581704299  | 4.6810867832  |
| H | 6.1117477086  | 2.2831193351  | 3.8326104912  |
| N | 10.5617831836 | 3.9906741127  | -0.2020283271 |
| H | 10.6910692654 | 3.0768859723  | 0.2426874335  |
| H | 11.3769127868 | 4.1100785223  | -0.7978753510 |
| H | 10.6989148078 | 4.6488126068  | 0.5779207177  |
| N | 8.7577419920  | 0.1800187550  | 6.6841613798  |
| H | 8.0773206701  | 0.6082456899  | 6.0715595012  |
| H | 8.2012361075  | -0.1592343286 | 7.4800780071  |
| H | 9.2816577757  | 1.0056164140  | 6.9347707814  |
| N | 8.8846711723  | -0.2132263133 | 1.6626054062  |
| N | 11.5536174453 | 4.8920432750  | 4.1169428378  |
| H | 9.1153505736  | 0.3879432080  | 2.4257345211  |
| H | 12.3852490207 | 4.9080898470  | 3.5354277118  |
| H | 9.6951489861  | -0.7007777355 | 1.3090196223  |
| H | 10.7967119942 | 5.2716289139  | 3.5883831614  |
| H | 8.5756613895  | 0.4519146929  | 0.9700884144  |
| H | 11.7314589403 | 5.5460580076  | 4.8936866221  |
| N | 2.0595549488  | 8.0861414791  | 4.2307560446  |
| N | 3.7361025399  | 1.3989508502  | 2.1870489377  |
| H | 1.1556527136  | 8.4717207299  | 3.9327357230  |
| H | 3.9733111980  | 2.1487781980  | 2.8091459771  |
| H | 1.8651708867  | 7.2102149370  | 4.6853628571  |
| H | 3.6830631824  | 0.5189399822  | 2.6401128092  |
| H | 2.3621947823  | 8.7901826633  | 4.9186036032  |
| H | 4.5398008229  | 1.2549232938  | 1.5481922683  |
| N | 4.2118907231  | 4.5871372268  | 9.1421894541  |
| N | 0.8748138981  | 4.7789151523  | 3.3586061310  |
| H | 4.9172356780  | 4.7288105301  | 9.9148519020  |
| H | 0.9363854121  | 3.9080016082  | 2.8934652612  |
| H | 3.3775994556  | 4.8101915480  | 9.6735639547  |
| H | 0.7626244073  | 5.4894011973  | 2.6631639114  |
| H | 4.2141259870  | 3.5740192047  | 9.1178623984  |
| H | 1.7504654544  | 4.9491501002  | 3.7890960673  |
| N | 5.5589298413  | -1.7937823372 | 5.3687629391  |
| H | 5.0531338475  | -2.1618658366 | 4.5967057634  |
| H | 6.5814863002  | -1.9500052722 | 5.1927086198  |
| H | 5.2729865906  | -2.3338235638 | 6.1303954694  |

#### 4500fs

92

# ORCA AIMD Position Step 9000, t=4500.00 fs, E\_Pot=-1300.54514401 Hartree, Unit is Angstrom

|   |               |               |              |
|---|---------------|---------------|--------------|
| N | 12.4046104330 | -0.0494194433 | 4.7610730595 |
|---|---------------|---------------|--------------|

|   |               |               |               |
|---|---------------|---------------|---------------|
| H | 11.8644043554 | -0.8637912623 | 5.0665268339  |
| H | 13.1952874996 | 0.0349519273  | 5.4293118903  |
| H | 11.8411619733 | 0.7078319237  | 5.1160814130  |
| N | 4.0448307992  | 8.8074111950  | 1.4085041018  |
| N | 6.9530736845  | 5.1627394032  | -1.2377177603 |
| H | 3.4942067557  | 9.0211647371  | 0.6165914101  |
| H | 7.8083550832  | 5.3461830611  | -1.8400230009 |
| H | 3.4382824538  | 9.0268653224  | 2.1515254215  |
| H | 6.1811168451  | 5.2081356907  | -1.8785933634 |
| H | 4.7888812925  | 9.4948503293  | 1.4954891238  |
| H | 6.8766967354  | 5.9880503608  | -0.6447786217 |
| N | 6.8208831397  | -2.5533497659 | 2.8569982034  |
| N | 7.1717153180  | 7.1902413740  | 1.2868316345  |
| H | 6.2836229113  | -2.8621607943 | 3.6609097392  |
| H | 7.7167606398  | 8.0539979540  | 1.3238844769  |
| H | 6.3978303411  | -3.1369119762 | 2.1386375091  |
| H | 6.2070418979  | 7.4402965721  | 1.5398256084  |
| H | 7.7006838029  | -3.0238775927 | 2.9499502959  |
| H | 7.6152919284  | 6.6436799073  | 2.0474319466  |
| N | 4.5369754745  | 5.1291266428  | 2.6294557406  |
| N | 4.2325408935  | 6.7050964583  | 6.6076312560  |
| H | 5.2721527919  | 4.8612763904  | 1.9456893223  |
| H | 3.4378841785  | 6.1954599766  | 7.0004078224  |
| H | 3.9548976854  | 4.3007755917  | 2.7041188021  |
| H | 3.9977218596  | 6.7612414821  | 5.5973363719  |
| H | 4.0004976824  | 5.8683710513  | 2.2497495475  |
| H | 5.0249371094  | 6.0847280493  | 6.6642665324  |
| N | 10.2059848019 | 8.3031533151  | 1.2011463762  |
| N | 4.9785252616  | 2.9186446111  | 5.2630768281  |
| H | 10.0236227183 | 7.4470481165  | 1.7007081759  |
| H | 5.6347308524  | 2.1556359217  | 5.0597655675  |
| H | 10.1623537533 | 8.1255128962  | 0.1770974115  |
| H | 5.2100283798  | 3.6148105273  | 4.5411073389  |
| H | 11.1581070543 | 8.5761559110  | 1.4824826055  |
| H | 5.3969071422  | 3.4117287463  | 6.1015237552  |
| N | 6.2163011547  | 2.6273772796  | 1.1659909778  |
| N | 2.1021237130  | 1.9689843930  | 5.8258407641  |
| H | 5.2779555643  | 2.3405850466  | 1.3966277818  |
| H | 2.9718531059  | 2.4657277085  | 5.6395304952  |
| H | 6.2399348859  | 3.5174690892  | 0.6517470985  |
| H | 1.3115427063  | 2.5780234264  | 5.6147089583  |
| H | 6.5218514615  | 1.9395660911  | 0.4786658799  |
| H | 2.0967997463  | 1.9494752780  | 6.8213896580  |
| N | 7.2779559139  | 7.0689825786  | 6.6180137757  |
| N | 7.9413297093  | 4.2449396253  | 3.8001301459  |
| H | 6.7092903268  | 7.6025569669  | 7.2731124254  |
| H | 7.3946585250  | 3.4146088134  | 3.7487307633  |
| H | 8.1378244726  | 7.6545570514  | 6.4689175463  |
| H | 7.6891852168  | 4.7546947510  | 4.6401578138  |
| H | 6.7906056523  | 7.1358935441  | 5.7100758736  |
| H | 7.6407758367  | 4.8096343609  | 2.9704214246  |
| N | 7.5435283194  | 0.6448077015  | 3.9435236859  |
| H | 8.2488238438  | 0.8487955988  | 3.2413917531  |
| H | 7.3535213500  | -0.3371536861 | 3.8240876858  |
| H | 6.7165000979  | 1.1320198580  | 3.6712227174  |
| N | 10.4296211766 | 5.1234556716  | 2.1325940693  |
| H | 10.2130301797 | 4.8589415426  | 1.1807046883  |
| H | 11.3921770070 | 4.8974617239  | 2.3535238053  |
| H | 9.8195842792  | 4.6098225077  | 2.7857796410  |
| N | 6.9512468189  | -1.2806232185 | 6.2526618658  |

|   |               |               |               |
|---|---------------|---------------|---------------|
| H | 7.7300156638  | -0.9410172087 | 5.7629527303  |
| H | 6.4172823927  | -0.5094907288 | 6.6087082649  |
| H | 7.2895020826  | -1.7944111190 | 7.0378568254  |
| N | 10.2728308386 | 0.6605884010  | 2.0351947590  |
| N | 10.7194190632 | 2.6095974802  | 6.0377608270  |
| H | 11.0521975709 | 0.1617493405  | 2.4775191130  |
| H | 11.0282937437 | 3.4837817794  | 5.6552742823  |
| H | 10.3097099524 | 0.4945113929  | 1.0200466730  |
| H | 9.7547763119  | 2.4986168804  | 5.6679715341  |
| H | 10.5030900143 | 1.6952888526  | 2.1573108928  |
| H | 10.6251043753 | 2.7048277724  | 7.0603500435  |
| N | 2.0128210214  | 9.0250011690  | 4.7020194338  |
| N | 2.4677321055  | 2.6548061737  | 2.5542663623  |
| H | 1.7504188187  | 8.0978801865  | 4.3443159115  |
| H | 1.5577196114  | 2.8234447914  | 2.0634856549  |
| H | 2.3250874814  | 8.9067949108  | 5.6549715297  |
| H | 2.7961980507  | 1.7758901706  | 2.1275506273  |
| H | 1.0754362193  | 9.4525558828  | 4.7430148420  |
| H | 2.1646805144  | 2.3213018357  | 3.4282900001  |
| N | 4.0962864538  | 3.0213781409  | 9.1241217818  |
| N | 1.4940341543  | 5.5212660016  | 3.8343271986  |
| H | 4.5679302180  | 3.8796736349  | 8.8941228259  |
| H | 0.9613885150  | 5.3254650528  | 4.6983468455  |
| H | 3.9028839116  | 2.8630796698  | 10.1132783174 |
| H | 1.4014010781  | 4.7193347427  | 3.2315410396  |
| H | 4.7095957460  | 2.3248839739  | 8.7122809685  |
| H | 2.4738301660  | 5.6088282496  | 4.0652584125  |
| N | 3.8656080790  | -0.4917772211 | 3.7246430373  |
| H | 4.7128464640  | -0.0267779670 | 4.1316794884  |
| H | 3.0306651034  | -0.2646948556 | 4.2476102932  |
| H | 4.0582464683  | -1.4674815458 | 3.7770233561  |

## 5000fs

92

# ORCA AIMD Position Step 10000, t=5000.00 fs, E\_Pot=-1300.52737086 Hartree, Unit is Angstrom

|   |               |               |               |
|---|---------------|---------------|---------------|
| N | 10.4699334388 | -0.3191463689 | 4.2162850089  |
| H | 9.8707032493  | 0.1853357085  | 4.8307881429  |
| H | 10.6642556207 | -1.2393713879 | 4.4515781355  |
| H | 11.3606863167 | 0.2465122196  | 4.1194763779  |
| N | 4.7523113994  | 8.1433374448  | 2.6724958754  |
| N | 6.6835327110  | 6.0559022967  | 0.6548325427  |
| H | 5.2697248295  | 8.2764971678  | 1.8174739494  |
| H | 7.1969121321  | 5.5093882546  | -0.1272341003 |
| H | 4.9604360336  | 8.9461954139  | 3.2074786615  |
| H | 5.8083595438  | 6.3362391990  | 0.1882636625  |
| H | 5.1190401074  | 7.3159001484  | 3.1645601221  |
| H | 7.2877719500  | 6.8400536265  | 0.7799921116  |
| N | 5.3982197805  | -2.8793437080 | 3.1317943662  |
| N | 8.5523149438  | 8.4319435699  | 1.7996663398  |
| H | 5.7311839243  | -3.8430248689 | 3.0491351337  |
| H | 9.5462453113  | 8.1817358608  | 1.7756350564  |
| H | 5.7322368233  | -2.5852049625 | 4.0238530683  |
| H | 8.5123553956  | 9.4376520176  | 1.9751897464  |
| H | 4.3810320664  | -2.7621603472 | 3.1464268906  |
| H | 8.2817855972  | 7.9571357346  | 2.7195936036  |
| N | 4.2918300829  | 5.1500544728  | 2.5868349810  |
| N | 4.1814145466  | 5.0237545743  | 5.6534237690  |
| H | 5.1842962959  | 5.1931882941  | 2.1845089283  |

|   |               |               |              |
|---|---------------|---------------|--------------|
| H | 4.2077676314  | 4.6898398861  | 4.7010465101 |
| H | 3.9318086151  | 4.2607558543  | 2.2017782569 |
| H | 4.6691035345  | 5.9188192446  | 5.5852162778 |
| H | 3.7363486187  | 5.8498329915  | 2.0769737140 |
| H | 4.7712162505  | 4.4142660133  | 6.1816825975 |
| N | 12.4898069319 | 9.1021311259  | 1.6380100579 |
| N | 5.2533196826  | 1.3840797006  | 4.1367037893 |
| H | 12.2301781963 | 8.1321685063  | 1.9211634477 |
| H | 5.1082305570  | 0.4571544804  | 3.8220054840 |
| H | 13.4640899027 | 9.1346180450  | 1.4484818470 |
| H | 4.4587696250  | 1.6990378279  | 4.6724394679 |
| H | 12.3134650762 | 9.6582916002  | 2.4309845792 |
| H | 5.2606798113  | 1.9845485115  | 3.3635957047 |
| N | 6.6852095532  | 2.5499978962  | 0.9099412419 |
| N | 1.9397276434  | 2.4645347375  | 5.5826172566 |
| H | 7.3749780230  | 2.0714058749  | 1.4773411882 |
| H | 2.4432737511  | 2.2807535044  | 6.4745440703 |
| H | 6.5107776590  | 3.5216615132  | 1.1154778757 |
| H | 1.6994530687  | 3.4664537908  | 5.4966763402 |
| H | 5.8766017541  | 1.9593729078  | 0.9851314612 |
| H | 1.1087461875  | 1.9014396748  | 5.6253873587 |
| N | 11.1705197918 | 8.5921902155  | 5.5918909468 |
| N | 7.5474745813  | 5.3802908849  | 3.5448714375 |
| H | 10.4346064007 | 7.9941476151  | 5.2073100334 |
| H | 7.5007189934  | 4.3848902483  | 3.8023083553 |
| H | 11.1973777092 | 9.3890622703  | 4.9122854442 |
| H | 6.7658826025  | 5.7493054780  | 4.0818388304 |
| H | 12.0781146963 | 8.1166712032  | 5.4973519732 |
| H | 7.2441382118  | 5.4319814222  | 2.5768407014 |
| N | 7.5825772023  | -0.2467058464 | 2.1057253404 |
| H | 7.0187728179  | -0.9690044157 | 2.5260022093 |
| H | 7.8221014643  | -0.6653808995 | 1.2462953635 |
| H | 8.3815648617  | -0.0249296667 | 2.6638602383 |
| N | 11.1002986056 | 6.2013707408  | 2.1928374215 |
| H | 10.4590247426 | 5.8585075689  | 1.4777094309 |
| H | 11.9826435165 | 5.7150424416  | 2.0107808851 |
| H | 10.7803682921 | 5.7627156239  | 3.0436813439 |
| N | 2.9404102666  | -3.2625532528 | 6.2058905398 |
| H | 3.6296382860  | -3.9532257443 | 6.0750280005 |
| H | 3.3625230479  | -2.4786988426 | 6.6588256551 |
| H | 2.3159711906  | -3.6634979857 | 6.8846637631 |
| N | 12.8040976717 | 2.2151548786  | 3.3745172455 |
| N | 8.2448656956  | 1.4403965252  | 5.7763893889 |
| H | 12.0941395101 | 2.4458205973  | 2.6601294039 |
| H | 8.0421252556  | 0.5689740210  | 6.1686592215 |
| H | 13.5805846551 | 2.7595362529  | 3.0810920291 |
| H | 8.8897889831  | 1.9445628293  | 6.3851307756 |
| H | 13.1458852556 | 1.2835797233  | 3.1128713345 |
| H | 7.3780679098  | 1.9461454054  | 5.6366684518 |
| N | 3.2705949493  | 8.7077534650  | 5.4344706465 |
| N | 2.2115080394  | 2.3253163584  | 2.0482950639 |
| H | 3.3682894622  | 8.6050251039  | 4.4297390226 |
| H | 1.2256277174  | 2.2439885473  | 1.7061216558 |
| H | 2.4134728460  | 8.3029024029  | 5.7088567960 |
| H | 2.5874969226  | 1.4388128573  | 1.9243896803 |
| H | 3.2127383610  | 9.7185445374  | 5.5701730492 |
| H | 2.1986350508  | 2.6247799543  | 3.0532820622 |
| N | 3.7098880390  | 3.3630659540  | 8.4879086234 |
| N | 0.9184278075  | 6.3266888406  | 4.9557316806 |
| H | 3.4113024063  | 3.5047343904  | 9.4430176866 |

|   |              |               |              |
|---|--------------|---------------|--------------|
| H | 1.7193591441 | 5.8733260723  | 5.4553098986 |
| H | 4.7176558545 | 3.1451960888  | 8.6175884617 |
| H | 0.1016978794 | 5.7469742469  | 5.1064407468 |
| H | 3.5908912631 | 4.3307444396  | 8.2006267560 |
| H | 1.1090486903 | 6.2675569721  | 3.9752505646 |
| N | 2.4757644216 | -0.9642103503 | 3.7631036375 |
| H | 2.5665365006 | -0.0049216198 | 4.2230233630 |
| H | 1.9010422070 | -0.8409301856 | 2.9794892167 |
| H | 2.0235602688 | -1.5726514627 | 4.4465942599 |

**Spin densities of (CO,H<sub>2</sub>O,HCN,CH<sub>3</sub>OH)-(NH<sub>3</sub>)<sub>n=8</sub> (no apparent electron transfer)**

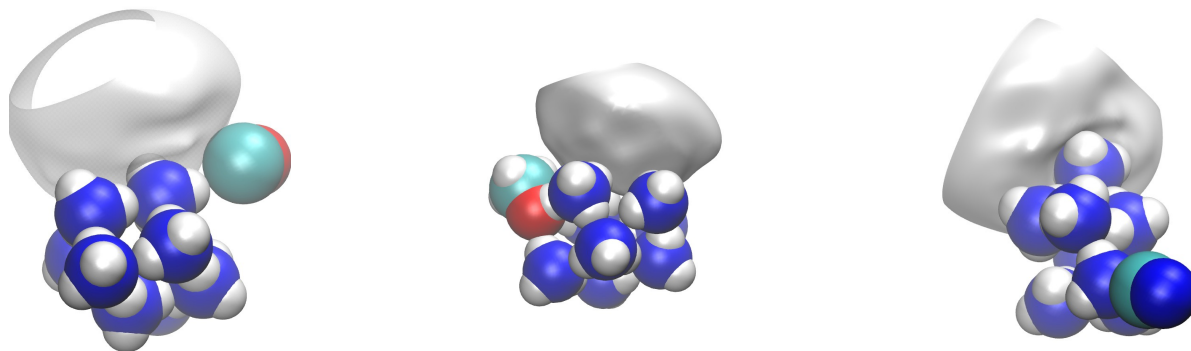

**Figure S7.** Interaction of the (NH<sub>3</sub>)<sub>8</sub><sup>+</sup> with CO (left panel), CH<sub>3</sub>OH (central panel) and HCN (right panel). No apparent electron transfer was found.



## Geometry Optimization+Freq, d-aug-cc-pVDZ

```
%MaxCore 1000
! UKS RIJCOSX PBE0 SmallPrint TightSCF Slowconv
! D4
! TightOpt
! defgrid3
! UNO
! UCO
! DIIS
```

```
%basis
GTOName "NH.bas"
end
```

```
%basis AuxC "AutoAux"
end
```

```
%basis AuxJ "AutoAux"
end
```

```
%basis
PCDTrimAuxC Coulomb
PCDThresh -1
end
```

```
%basis
PCDTrimAuxJ Coulomb
PCDThresh -1
end
```

```
%scf Maxiter=350
end
```

```
%geom Maxiter=300
end
```

```
%base "OPT"
```

```
* xyzfile -1 2 Start.xyz
```

```
$new_job
%MaxCore 2000
! UKS PBE0 RIJCOSX SmallPrint TightSCF Slowconv
! D4
! NumFreq
! defgrid3
! UNO
! UCO
! DIIS
! MOrad
```

```
%moinp "OPT.gbw"
```

```
%basis
GTOName "NH.bas"
end
```

```
%basis AuxC "AutoAux"  
end  
  
%basis AuxJ "AutoAux"  
end  
  
%basis  
PCDTrimAuxC Coulomb  
PCDThresh -1  
end  
  
%basis  
PCDTrimAuxJ Coulomb  
PCDThresh -1  
end  
  
%scf Maxiter=150  
end  
  
%base "FREQ"  
  
%freq Temp 100, 200, 300  
CentralDiff true  
Increment 0.0030  
end  
  
* xyzfile -1 2 OPT.xyz
```

## **DLPNO-CCSD(T), d-aug-cc-pV(D,T,Q)Z**

```
%MaxCore 5000
! UHF RIJCOSX DLPNO-CCSD(T) NormalPNO VeryTightSCF SCFConvForced VerySlowConv
! UNO
! defgrid3
! DIIS
! MOrad
! NoTRAH
```

```
%basis
GTOName "NH.bas"
end
```

```
%basis AuxC "AutoAux"
end
```

```
%basis AuxJ "AutoAux"
end
```

```
%basis
PCDTrimAuxC Coulomb
PCDThresh -1
end
```

```
%basis
PCDTrimAuxJ Coulomb
PCDThresh -1
end
```

```
%moinp "OPT.gbw"
```

```
%base "DLPNO"
```

```
%scf sthresh 1e-7
end
```

```
%scf Maxiter 1500
  DIISMaxEq 15
  DirectResetFreq 1
end
```

```
%scf GuessMode CMatrix
end
```

```
%mdci Maxiter 500
end
```

```
%mdci MaxDIIS 14
LShift 0.1
end
```

```
%mdci
UseFullLMP2Guess false
end
```

```
%mdci LocRandom 0
end
```

```
%mdci KCOpt KC_MO  
end
```

```
%mdci TrafoType trafo_full  
end
```

```
%mdci Triples 2  
end
```

```
* xyzfile -1 2 OPT.xyz
```

## WF Stability, d-aug-cc-pV(D,T,Q)Z

```
%MaxCore 5000
! UHF RIJCOSX SmallPrint VeryTightSCF VerySlowConv
! defgrid3
! DIIS
#! MORead
! NoTRAH
```

```
%basis
GTOName "NH.bas"
end
```

```
%basis AuxC "AutoAux"
end
```

```
%basis AuxJ "AutoAux"
end
```

```
%basis
PCDTrimAuxC Coulomb
PCDThresh -1
end
```

```
%basis
PCDTrimAuxJ Coulomb
PCDThresh -1
end
```

```
%scf Maxiter 1500
DIISMaxEq 15
DirectResetFreq 1
end
```

```
%scf
soscmaxit 12
directresetfreq 1
end
```

```
%scf sthresh 1e-7
end
```

```
%scf
HFTyp UHF
STABPerform true
end
```

```
%base "Stab"
```

```
##%moinp "DLPNO.gbw"
```

```
* xyzfile -1 2 OPT.xyz
```

## Opt. Geom. XYZ (Å) (NH<sub>3</sub>)<sub>4</sub>, d-aug-cc-pVDZ

### Tetramer neutral

16

Coordinates from ORCA-job OPT

|   |                   |                   |                  |
|---|-------------------|-------------------|------------------|
| N | -0.44577929983220 | 0.58586881379384  | 3.32248357719557 |
| N | 3.41088309239111  | -0.88450249798530 | 4.85496060866407 |
| N | 0.59028888308298  | -0.43222195896487 | 6.06403659519922 |
| H | -1.12966998732762 | 0.03815808050153  | 2.80682227840843 |
| H | 4.10377789193431  | -0.35220824970322 | 5.37472153421829 |
| H | 0.04179705884671  | -1.23110696424516 | 6.37151048376919 |
| H | -0.72860035080168 | 1.55652440737669  | 3.21557716494886 |
| H | 0.45103032437580  | 0.48193507763104  | 2.82836536076966 |
| H | 2.51647923408829  | -0.77199930994575 | 5.35154812585725 |
| H | 3.67916364105919  | -1.86031617613108 | 4.95200488297889 |
| N | 2.38266483006994  | 0.16210417741626  | 2.12136925945514 |
| H | 2.92635514443732  | 0.96996195921659  | 1.82916247921745 |
| H | 2.82387194861028  | -0.19790568978866 | 2.97859201396395 |
| H | 2.52251380423719  | -0.54225951905839 | 1.40170152753571 |
| H | 0.46091917129193  | 0.28378536359898  | 6.77411695443260 |
| H | 0.14666461353643  | -0.08093751371250 | 5.20444715338557 |

### Tetramer+e<sup>-</sup>

16

Coordinates from ORCA-job OPT

|   |                   |                   |                  |
|---|-------------------|-------------------|------------------|
| N | -0.43196082550541 | 0.56813672731486  | 3.31643956687137 |
| N | 3.41910893121013  | -0.88250628302170 | 4.85636764032646 |
| N | 0.59424345412979  | -0.43276718171875 | 6.07787573516974 |
| H | -1.11861484834381 | 0.02044932065155  | 2.80239659433355 |
| H | 4.11291866426106  | -0.34820474503654 | 5.37477694179683 |
| H | 0.04271944350465  | -1.22925705248050 | 6.38945844256083 |
| H | -0.71994330051415 | 1.53913037317914  | 3.21656367613207 |
| H | 0.46112236562192  | 0.47126730593551  | 2.81364814386665 |
| H | 2.52539859805183  | -0.77046093290831 | 5.35489619145187 |
| H | 3.68860054356282  | -1.85885332107733 | 4.95512517566427 |
| N | 2.40855889124712  | 0.17165560770264  | 2.11106413531741 |
| H | 2.94573732071174  | 0.99047172139554  | 1.83449850507289 |
| H | 2.84457215351178  | -0.19297788455353 | 2.96941544198226 |
| H | 2.56518525004177  | -0.52316386069313 | 1.38426972048937 |
| H | 0.46022999855357  | 0.29016404061202  | 6.78153636988399 |
| H | 0.15448335995508  | -0.08820383530145 | 5.21308771908007 |

## (NH<sub>3</sub>)<sub>4</sub> EA estimated by CBS

Fitting functions based on 2 sets of basis sets:

$$n^3 = E_{\text{CBS}} + (A/n^3)$$

$$n^4 = E_{\text{CBS}} + [A/(n+1/2)^4]$$

-----

Fitting functions based on 3 sets of basis sets:

$$\exp(\alpha X) = E_{\text{CBS}} + B e^{-\alpha X}$$

$$n^{46} = E_{\text{CBS}} + [A/(n+1/2)^4] + [A/(n+1/2)^6]$$

-----

|             | Neutral Cluster | EA (kcal/mol) | Radical-Anion cluster |             |
|-------------|-----------------|---------------|-----------------------|-------------|
| aug-cc-pVDZ | -225.72980995   | -11.7         | -225.71116307         | aug-cc-pVDZ |
| aug-cc-pVTZ | -225.94926789   | -5.0          | -225.94125697         | aug-cc-pVTZ |
| aug-cc-pVQZ | -226.00969775   | -1.5          | -226.00723332         | aug-cc-pVQZ |

|                               | Neutral Cluster | EA (kcal/mol) | Radical-Anion cluster |                               |
|-------------------------------|-----------------|---------------|-----------------------|-------------------------------|
| 1/n <sup>3</sup> CBS_TZ/QZ    | -226.05379522   | 1.0           | -226.05537822         | 1/n <sup>3</sup> CBS_TZ/QZ    |
| 1/n <sup>4</sup> CBS_TZ/QZ    | -226.04457566   | 0.5           | -226.04531246         | 1/n <sup>4</sup> CBS_TZ/QZ    |
| n <sup>46</sup> CBS_DZ/ITZ/QZ | -226.04842855   | 1.1           | -226.05023204         | n <sup>46</sup> CBS_DZ/ITZ/QZ |
| exp(-αX) CBS_DZ/ITZ/QZ        | -226.03266079   | 0.7           | -226.03375625         | exp(-αX) CBS_DZ/ITZ/QZ        |

|               | Neutral Cluster | EA (kcal/mol) | Radical-Anion cluster |               |
|---------------|-----------------|---------------|-----------------------|---------------|
| d-aug-cc-pVDZ | -225.73270019   | -3.3          | -225.72751155         | d-aug-cc-pVDZ |
| d-aug-cc-pVTZ | -225.95008653   | -2.9          | -225.94541119         | d-aug-cc-pVTZ |

|                             | Neutral Cluster | EA (kcal/mol) | Radical-Anion cluster |                             |
|-----------------------------|-----------------|---------------|-----------------------|-----------------------------|
| 1/n <sup>3</sup> CBS_DZ/ITZ | -226.04161762   | -2.8          | -226.03715841         | 1/n <sup>3</sup> CBS_DZ/ITZ |
| 1/n <sup>4</sup> CBS_DZ/ITZ | -226.02658792   | -2.8          | -226.02209321         | 1/n <sup>4</sup> CBS_DZ/ITZ |

**Figure S8.** Calculated EA values using different CBS fitting functions and basis sets.

Because of the diffuse nature of the radical-anion if reliable results are to be obtained, very fine grids of integration, tight conditions in the SCF and optimization procedures must be set in conjunction with wavefunction stability, T1 and S<sup>2</sup> analysis when the DLPNO-CCSD(T) method, is applied.

CBS extrapolation fitting procedures, though increasing the computational efforts, when possible should be preferred for a better estimation of the considered electronic parameters.
